# Supplementary material for: A deep neural network model for packing density predictions and its application in the study of 1.5 million organic molecules
Source: Chem Sci. 2019 Jul 9;10(36):8374–83. doi: 10.1039/c9sc02677k (PMC6855195; doi:10.1039/c9sc02677k)
Supplement: Supplementary file 2 [file SC-010-C9SC02677K-s002.xlsx]

## Sheet: Title and authors
A Deep Neural Network Model for Packing Density Predictions and its Application in the Study of 1.5 Million Organic Molecules

## Sheet: MD_screening
Sl. No.	Sl. No. Brom Bull library	SMILES	Combination_code	Density_MD (kg/m3)
1	1	C1CCC(C1)Cc1ccccc1	B1-B10-B5	953.879
2	22	Oc1cc2ccccc2c(c1)O	B3-B16-B3	1305.93
3	47	c1cnc(cn1)Cc1cocc1	B1-B12-B15	1223.1
4	63	Cc1cccnc1C1CCCC1	B1-B11-B10	1032.93
5	71	Oc1ccc(cn1)c1cocc1	B3-B11-B15	1322.5
6	105	Oc1occc1c1ccccn1	B3-B15-B11	1321.25
7	133	c1ccc(nc1)c1cccnc1	B11-B11	1193.7
8	152	Cc1cccc(c1)c1ccco1	B5-B15-B1	1113.82
9	162	Cc1occc1c1ccccc1	B5-B15-B1	1109.7
10	166	Oc1ccc(c2c1cccc2)C	B3-B16-B1	1184.13
11	173	Cc1ccc(cn1)c1ccco1	B1-B11-B15	1172.44
12	176	Cc1ccc(nc1)c1cocc1	B1-B11-B15	1175.46
13	183	Cc1cccnc1c1ccoc1	B1-B11-B15	1178.73
14	191	Cc1cncc(c1)c1ccco1	B1-B11-B15	1180.24
15	235	CCc1occc1c1ccco1	B15-B15-B1-B1	1167.51
16	256	Cc1coc(c1)c1occc1C	B15-B15-B1-B1	1151.52
17	257	Cc1coc(c1C)c1ccco1	B15-B15-B1-B1	1183.25
18	270	Cc1occ(c1)c1ccc(o1)C	B15-B15-B1-B1	1143.85
19	271	Cc1occ(c1)c1ccoc1C	B15-B15-B1-B1	1174.88
20	292	Oc1ccoc1c1cnccn1	B3-B15-B12	1397.39
21	301	Oc1occ(c1)c1cnccn1	B3-B15-B12	1392.37
22	334	C1CCC(C1)Oc1nccnc1	B3-B12-B10	1152.44
23	338	CC(c1cocc1)C1CCCC1	B1-B10-B1-B15	1003.59
24	392	COc1ccoc1c1cocc1	B3-B15-B1-B15	1293.47
25	396	COc1cocc1c1cocc1	B3-B15-B1-B15	1294.37
26	402	Cc1c(coc1C)C1CCCC1	B10-B15-B1-B1	1001.05
27	407	Cc1cc(oc1O)c1cocc1	B1-B15-B3-B15	1293.16
28	421	Cc1ccoc1c1cocc1O	B15-B15-B3-B1	1330.63
29	430	Cc1coc(c1)c1occc1O	B15-B15-B3-B1	1293.29
30	466	OC(c1ccco1)c1ccoc1	B1-B15-B3-B15	1287.95
31	513	Oc1occ(c1)Cc1ccco1	B1-B15-B3-B15	1277.76
32	544	CC1(CCCC1)c1cocc1O	B10-B15-B1-B3	1127.79
33	549	CC1(O)CCCC1c1cocc1	B1-B10-B3-B15	1118.03
34	590	CCC1CCC(C1)C1CCCC1	B1-B10-B1-B10	876.604
35	593	COC1(CCCC1)c1cocc1	B1-B3-B10-B15	1103.75
36	595	COC1CCC(C1)c1cocc1	B1-B3-B10-B15	1105.8
37	615	Cc1occ(c1)C1(O)CCCC1	B10-B15-B1-B3	1109.05
38	620	OC1(CCCC1)Cc1ccco1	B1-B10-B3-B15	1104.45
39	653	OCC1(CCCC1)c1cocc1	B1-B10-B3-B15	1126.49
40	659	OCc1ccoc1C1CCCC1	B1-B15-B3-B10	1119.14
41	668	OOc1coc(c1)c1ccco1	B3-B15-B3-B15	1389.69
42	679	Oc1cc(c(o1)c1cocc1)O	B3-B15-B3-B15	1473.38
43	680	Oc1cc(oc1C)C1CCCC1	B1-B15-B3-B10	1104.55
44	711	Oc1oc(c(c1)c1cocc1)O	B3-B15-B3-B15	1472.72
45	718	Oc1occ(c1)Oc1cocc1	B3-B15-B3-B15	1426.55
46	796	OC1(CCCC1)Oc1cocc1	B3-B10-B3-B15	1219.23
47	829	OC1CCC(C1c1cocc1)O	B3-B10-B3-B15	1246.52
48	835	OC1CCCC1Oc1ccco1	B3-B10-B3-B15	1212.46
49	842	OC1CCCC1c1occc1O	B10-B15-B3-B3	1237.72
50	844	OCC1CCC(C1)C1CCCC1	B1-B10-B3-B10	977.721
51	848	OOC1CCC(C1)c1ccco1	B3-B3-B10-B15	1193.09
52	858	Oc1c(O)coc1C1CCCC1	B3-B15-B3-B10	1237.45
53	872	c1ccc(cc1)Cc1ccccc1	B1-B5-B5	1025.34
54	877	CC1(CCCC1)N1CNCNC1	B1-B10-B9	1119.59
55	886	CN1CNC(NC1)C1CCCC1	B1-B9-B10	1104.01
56	891	Cc1ccc(cc1)c1ccncc1	B1-B5-B11	1106.86
57	911	OC1(NCNCN1)c1ccco1	B3-B9-B15	1425.03
58	913	OC1NCN(CN1)c1ccco1	B3-B9-B15	1426.11
59	923	ON1CNCNC1c1ccco1	B3-B9-B15	1407.97
60	928	Oc1ccoc1N1CNCNC1	B3-B15-B9	1439.23
61	931	Oc1cocc1C1NCNCN1	B3-B15-B9	1444.08
62	976	Cc1ccc2c(c1)cc(cc2C)C	B1-B16-B1-B1	1040.86
63	992	Cc1ccncc1c1cccnc1	B1-B11-B11	1153.67
64	1000	Cc1cnccc1c1cccnc1	B1-B11-B11	1154.3
65	1005	Cc1ncccc1c1ccccn1	B1-B11-B11	1150.36
66	1028	OOC1CCCC1C1CCCC1	B3-B3-B10-B10	1036.91
67	1034	c1ccc(cn1)Cc1cccnc1	B1-B11-B11	1136.76
68	1037	n1ccc(cc1)Cc1ccccn1	B1-B11-B11	1139.37
69	1044	Cc1cccnc1c1nccnc1	B1-B11-B12	1213.13
70	1052	Cc1cncc(n1)c1cccnc1	B1-B12-B11	1207.11
71	1067	OC1CCCC1N1CNCNC1	B9-B10-B3	1233.47
72	1071	ON1CNC(NC1)C1CCCC1	B3-B9-B10	1207.62
73	1074	Oc1ccc(cc1)c1ccccn1	B3-B5-B11	1225.75
74	1090	Oc1cnccc1c1ccccc1	B3-B11-B5	1221.75
75	1108	CCc1cc2ccccc2cc1O	B1-B1-B16-B3	1133.6
76	1109	CCc1ccc(c2c1cccc2)O	B1-B1-B16-B3	1149.96
77	1133	COc1c(C)ccc2c1cccc2	B3-B16-B1-B1	1123.21
78	1138	COc1ccc2c(c1)c(C)ccc2	B3-B16-B1-B1	1140.16
79	1217	Cc1nccnc1c1cnccn1	B1-B12-B12	1276.59
80	1219	Cc1oc(cc1C)c1ccccc1	B5-B15-B1-B1	1083.18
81	1236	OCc1ccc2c(c1)c(C)ccc2	B1-B16-B1-B3	1151.03
82	1246	Oc1cc(C)c2c(c1)c(C)ccc2	B1-B16-B1-B3	1171.37
83	1257	Oc1ccc(nc1)c1ccncc1	B3-B11-B11	1290.06
84	1273	Oc1cccnc1c1ccncc1	B3-B11-B11	1288.75
85	1287	Oc1cnccc1c1ccncc1	B3-B11-B11	1293.53
86	1297	c1ccc(cc1)Oc1cnccn1	B3-B5-B12	1245.09
87	1306	CC(c1ccco1)c1cccnc1	B1-B1-B11-B15	1132.3
88	1312	CCc1ccc(cn1)c1cocc1	B1-B1-B11-B15	1143.63
89	1331	CCc1cnccc1c1ccco1	B1-B1-B11-B15	1141.9
90	1338	CCc1cocc1c1ccncc1	B1-B15-B11-B1	1148.86
91	1339	CCc1nccc(c1)c1ccco1	B1-B1-B11-B15	1150.53
92	1350	Cc1cc(C)nc(c1)c1ccoc1	B1-B11-B1-B15	1139.59
93	1401	Cc1ccnc(c1C)c1ccco1	B1-B11-B1-B15	1148.26
94	1404	Cc1ccnc(c1c1ccoc1)C	B1-B11-B1-B15	1144.54
95	1431	Cc1cnccc1Cc1cocc1	B1-B11-B1-B15	1144.86
96	1439	Cc1coc(c1)c1cccnc1C	B1-B15-B11-B1	1136.76
97	1470	Cc1ncccc1c1occc1C	B1-B15-B11-B1	1125.17
98	1471	Cc1oc(c(c1)c1ccccn1)C	B1-B15-B11-B1	1130.66
99	1480	Cc1occ(c1)c1cccc(n1)C	B1-B11-B15-B1	1126.36
100	1487	Cc1occ(c1)c1ncccc1C	B1-B11-B15-B1	1138.58
101	1493	Cc1occ(c1c1ccncc1)C	B1-B15-B11-B1	1127.3
102	1495	Cc1occc1Cc1cccnc1	B1-B15-B11-B1	1133.49
103	1503	Oc1cnc(cn1)c1ccccn1	B3-B12-B11	1343.82
104	1512	Oc1ncccc1c1nccnc1	B3-B11-B12	1353.97
105	1542	CC1CCCC1(C)c1ccccc1	B1-B10-B5-B1	980.608
106	1579	COc1ccc2c(c1O)cccc2	B3-B16-B3-B1	1251.96
107	1595	Cc1c(O)cc2c(c1O)cccc2	B3-B16-B3-B1	1269.28
108	1602	Cc1cc(cc(c1)C)C1CCCC1	B1-B5-B10-B1	958.547
109	1619	Cc1ccc(cc1)c1ccoc1O	B5-B15-B3-B1	1207.65
110	1632	Cc1ccc(o1)c1nccnc1C	B1-B15-B12-B1	1185.88
111	1633	Cc1ccc(s1)c1ccccc1	B5-B7-B1	1159.68
112	1639	Cc1ccc2c(c1)cc(cc2)S	B2-B16-B1	1188.31
113	1645	Cc1ccc2c(c1O)cccc2O	B3-B16-B3-B1	1269.99
114	1662	Cc1cccc(c1c1ccoc1)O	B3-B5-B15-B1	1203.81
115	1697	Cc1coc(c1c1ccccc1)O	B5-B15-B3-B1	1193.66
116	1739	OCc1cc(O)cc2c1cccc2	B1-B3-B16-B3	1277.63
117	1741	OCc1ccc(c2c1cccc2)O	B1-B3-B16-B3	1282.21
118	1767	OOc1cc(C)cc2c1cccc2	B3-B16-B3-B1	1215.19
119	1769	OOc1ccc(c2c1cccc2)C	B3-B16-B3-B1	1223.42
120	1778	OOc1cccc2c1cccc2C	B3-B16-B3-B1	1235.7
121	1780	Oc1c(O)cc2c(c1C)cccc2	B3-B16-B3-B1	1280.3
122	1782	Oc1cc(C)c2c(c1)c(O)ccc2	B3-B16-B3-B1	1294.83
123	1788	Oc1cc(c(o1)c1ccccc1)C	B5-B15-B3-B1	1195.83
124	1809	Oc1ccc(o1)c1ccccc1C	B5-B15-B3-B1	1201.03
125	1816	Oc1ccc2c(c1)cc(c(c2)O)C	B3-B16-B3-B1	1262.83
126	1820	Oc1ccc2c(c1)ccc(c2O)C	B3-B16-B3-B1	1265.83
127	1842	Oc1coc(c1)Cc1ccccc1	B1-B15-B3-B5	1185.54
128	1874	CC(c1cccnc1)C1CCCC1	B1-B10-B11-B1	1003.83
129	1910	CC1CCC(C1C)c1ccccn1	B1-B10-B11-B1	994.464
130	1931	CCC1(CCCC1)c1ccccn1	B1-B10-B11-B1	1011.67
131	1937	CCC1CCCC1c1ccccn1	B1-B10-B11-B1	994.299
132	1949	CCc1ncccc1C1CCCC1	B1-B11-B10-B1	1004.18
133	1957	COc1cccc(n1)c1ccco1	B3-B11-B15-B1	1245.65
134	1960	COc1cccnc1c1ccoc1	B3-B11-B15-B1	1265.16
135	1979	COc1nccc(c1)c1cocc1	B3-B11-B15-B1	1274.13
136	1983	COc1occ(c1)c1cccnc1	B3-B15-B11-B1	1262.92
137	2027	Cc1ccc(nc1)c1ccoc1O	B3-B15-B11-B1	1265.42
138	2036	Cc1ccc(o1)Oc1ccccn1	B3-B15-B11-B1	1217.6
139	2049	Cc1cccc(n1)CC1CCCC1	B1-B10-B11-B1	983.673
140	2055	Cc1cccc(n1)c1coc(c1)O	B3-B15-B11-B1	1258.59
141	2059	Cc1ccccc1c1cncs1	B1-B5-B14	1220.78
142	2065	Cc1cccnc1Oc1ccoc1	B3-B15-B11-B1	1220.36
143	2072	Cc1ccnc(c1)Oc1ccco1	B3-B15-B11-B1	1220.3
144	2082	Cc1ccnc(c1O)c1ccco1	B3-B11-B15-B1	1277.06
145	2095	Cc1ccoc1Oc1ccccn1	B3-B15-B11-B1	1214.7
146	2100	Cc1ccsc1c1ccncc1	B1-B7-B11	1218.02
147	2108	Cc1cnc(cc1O)c1cocc1	B3-B11-B15-B1	1277.85
148	2111	Cc1cncc(c1)CC1CCCC1	B1-B10-B11-B1	994.783
149	2112	Cc1cncc(c1)Oc1ccco1	B3-B15-B11-B1	1222.53
150	2117	Cc1cncc(c1)c1cocc1O	B3-B15-B11-B1	1281.29
151	2119	Cc1cncc(c1)c1occ(c1)O	B3-B15-B11-B1	1276.29
152	2145	Cc1coc(c1O)c1cccnc1	B3-B15-B11-B1	1270.24
153	2155	Cc1csc(c1)c1ccncc1	B1-B7-B11	1225
154	2164	Cc1ncc(c(c1)O)c1ccco1	B3-B11-B15-B1	1268.72
155	2175	Cc1nccc(c1)Oc1ccco1	B3-B15-B11-B1	1218.17
156	2199	Cc1occ(c1)Oc1ccccn1	B3-B15-B11-B1	1216.7
157	2211	Cc1occ(c1O)c1ccncc1	B3-B15-B11-B1	1274.96
158	2222	Cc1scnc1c1ccccc1	B1-B14-B5	1202.23
159	2230	OCc1ccc(cn1)c1cocc1	B1-B3-B11-B15	1284.71
160	2255	OCc1cocc1c1cccnc1	B1-B15-B3-B11	1289.52
161	2285	Oc1ccc(cn1)c1occc1C	B3-B11-B15-B1	1262.43
162	2287	Oc1ccc(nc1)Cc1cocc1	B1-B11-B3-B15	1253.9
163	2293	Oc1ccc(nc1)c1occc1C	B3-B11-B15-B1	1269.5
164	2295	Oc1ccc(nc1C)c1cocc1	B3-B11-B15-B1	1268.04
165	2302	Oc1ccc(o1)c1ncccc1C	B3-B15-B11-B1	1256.31
166	2384	Oc1nccc(c1)c1occc1C	B3-B11-B15-B1	1266.22
167	2410	Oc1occc1Cc1ccncc1	B1-B15-B3-B11	1250.97
168	2420	c1ccc(nc1)COc1ccco1	B1-B3-B11-B15	1231.51
169	2436	CC1(C)CCC(C1)c1cnccn1	B1-B10-B12-B1	1052.14
170	2438	CC1(CCCC1)Cc1nccnc1	B1-B12-B10-B1	1057.75
171	2443	CC1(O)CCC(C1)c1ccccc1	B1-B10-B5-B3	1054.72
172	2452	CC1CCC(C1)Cc1cnccn1	B1-B12-B10-B1	1040.28
173	2482	COc1ccc(o1)c1cnccn1	B3-B15-B12-B1	1316.79
174	2496	Cc1c(cccc1O)C1CCCC1	B1-B5-B10-B3	1067.5
175	2500	Cc1ccc(c(c1)O)C1CCCC1	B1-B5-B10-B3	1056.59
176	2530	Cc1ccnc(c1)c1cncs1	B1-B11-B14	1289
177	2551	Cc1cnc(cn1)c1occc1O	B1-B12-B15-B3	1331.67
178	2568	Cc1cnccc1c1cscn1	B1-B11-B14	1285.72
179	2601	Cc1nccnc1c1cccs1	B1-B12-B7	1280.15
180	2613	Cc1occ(c1)c1nccnc1O	B1-B15-B12-B3	1329.33
181	2616	Cc1scc(c1)c1cnccn1	B1-B7-B12	1285.05
182	2619	Cc1scc(n1)c1ccncc1	B1-B14-B11	1280.44
183	2629	OC1C(C)CCC1c1ccccc1	B1-B10-B5-B3	1051.97
184	2636	OC1CCC(C1)c1ccccc1C	B1-B5-B10-B3	1070.89
185	2657	OCc1nccnc1c1cocc1	B1-B12-B15-B3	1354.4
186	2672	OOc1ccc2c(c1)ccc(c2)O	B3-B16-B3-B3	1341.25
187	2690	Oc1c(O)cc2c(c1O)cccc2	B3-B16-B3-B3	1418.88
188	2694	Oc1cc(O)c2c(c1)ccc(c2)O	B3-B16-B3-B3	1413.68
189	2705	Oc1ccc(c(c1)O)c1ccco1	B3-B5-B15-B3	1345.41
190	2710	Oc1ccc(cc1)CC1CCCC1	B1-B10-B5-B3	1038.85
191	2716	Oc1ccc(cc1)c1coc(c1)O	B3-B5-B15-B3	1347.77
192	2758	Oc1cccc2c1cccc2S	B2-B16-B3	1356.44
193	2844	c1ccc(cc1)Cc1nsnc1	B1-B13-B5	1274.33
194	2850	c1ccc(cc1)Sc1cocc1	B2-B5-B15	1238.81
195	2855	c1ccc(nc1)Cc1cscn1	B1-B14-B11	1268.4
196	2879	CC1(NCNCN1)c1ccccc1	B1-B9-B5	1208.84
197	2883	CC1(O)CCCC1c1ccccn1	B1-B10-B11-B3	1099.41
198	2891	CC1CCC(C1)(O)c1cccnc1	B1-B10-B11-B3	1109.5
199	2908	CC1CCC(C1c1ccccn1)O	B1-B10-B11-B3	1097.49
200	2917	CC1CCCC1c1ccc(cn1)O	B1-B10-B11-B3	1095.01
201	2922	CC1CCCC1c1ccncc1O	B1-B10-B11-B3	1107.62
202	2941	COC1CCCC1c1ccncc1	B1-B3-B10-B11	1095.51
203	2951	COc1ncccc1C1CCCC1	B1-B3-B11-B10	1093.58
204	2958	Cc1ccc(cc1)C1NCNCN1	B1-B5-B9	1206.58
205	2972	Cc1cccc(n1)c1nncs1	B1-B11-B8	1333.8
206	2985	Cc1ccncc1c1nncs1	B1-B11-B8	1345.06
207	3011	Cc1ncc(s1)c1nccnc1	B1-B14-B12	1346.75
208	3026	Cc1nsnc1c1ccccn1	B1-B13-B11	1353.42
209	3035	OC(c1ccncc1)C1CCCC1	B1-B10-B11-B3	1100.2
210	3036	OC1(CCCC1)Cc1ccccn1	B1-B10-B11-B3	1099.34
211	3051	OC1CCC(C1)(C)c1cccnc1	B1-B10-B11-B3	1123.83
212	3062	OC1CCC(C1)c1cncc(c1)C	B1-B11-B10-B3	1110.5
213	3090	OCC1CCCC1c1ccccn1	B1-B10-B11-B3	1105.29
214	3139	OOc1occc1c1cccnc1	B3-B15-B11-B3	1362.07
215	3176	Oc1ccc(nc1)c1cccs1	B3-B11-B7	1358.39
216	3188	Oc1ccc(o1)Oc1ccncc1	B3-B15-B11-B3	1367.48
217	3191	Oc1ccc(o1)c1cnccc1O	B3-B15-B11-B3	1417.69
218	3227	Oc1ccnc(c1)c1cscc1	B3-B11-B7	1369.48
219	3237	Oc1ccncc1Oc1ccoc1	B3-B15-B11-B3	1360.6
220	3239	Oc1ccncc1c1ccoc1O	B3-B11-B15-B3	1420.44
221	3244	Oc1ccoc1Oc1cccnc1	B3-B15-B11-B3	1371.36
222	3316	Oc1nccc(c1)C1(C)CCCC1	B1-B10-B11-B3	1118
223	3323	Oc1nccc(c1)c1cocc1O	B3-B15-B11-B3	1430.34
224	3331	Oc1ncccc1Oc1cocc1	B3-B15-B11-B3	1367.36
225	3370	Oc1sccc1c1ccncc1	B3-B7-B11	1366.75
226	3407	Sc1occc1c1ccccn1	B2-B15-B11	1345.78
227	3448	CC(c1cccs1)c1ccoc1	B1-B15-B7-B1	1190.29
228	3470	CC1CCCC1Oc1cnccn1	B3-B12-B10-B1	1124.72
229	3494	CCc1cocc1c1cscc1	B1-B15-B7-B1	1243.87
230	3501	CCc1occc1c1cccs1	B1-B15-B7-B1	1228.98
231	3531	Cc1ccc(o1)Cc1cscc1	B1-B15-B7-B1	1178.68
232	3534	Cc1ccc(o1)c1cscc1C	B1-B15-B7-B1	1223.15
233	3537	Cc1ccc(s1)Cc1cocc1	B1-B15-B7-B1	1174.72
234	3538	Cc1ccc(s1)c1ccoc1C	B1-B7-B15-B1	1220.99
235	3542	Cc1cccc(n1)N1CNCNC1	B9-B11-B1	1254.67
236	3550	Cc1ccoc1Cc1cscc1	B1-B15-B7-B1	1197.12
237	3581	Cc1csc(c1)c1ccoc1C	B1-B7-B15-B1	1228.34
238	3593	Cc1ncccc1C1NCNCN1	B9-B11-B1	1270.69
239	3605	Cc1occ(c1)Cc1cscc1	B1-B15-B7-B1	1179.63
240	3620	Cc1occc1c1sccc1C	B1-B7-B15-B1	1253.96
241	3622	Cc1sc(c(c1)c1cocc1)C	B1-B7-B15-B1	1234.28
242	3641	N1CNC(NC1)Cc1cccnc1	B1-B9-B11	1263.57
243	3646	OC1(CCCC1)Oc1ccccc1	B3-B5-B10-B3	1127.87
244	3650	OC1(CCCC1)c1nccnc1C	B3-B10-B12-B1	1168.95
245	3662	OC1CCC(C1)c1cccc(c1)O	B3-B10-B5-B3	1170.99
246	3689	OOc1cccc(c1)C1CCCC1	B3-B5-B10-B3	1121.1
247	3709	Oc1ccc(cc1C1CCCC1)O	B3-B5-B10-B3	1166.32
248	3710	Oc1ccc(cc1O)C1CCCC1	B3-B5-B10-B3	1167.87
249	3715	Oc1ccc(nc1)c1cscn1	B3-B11-B14	1430.95
250	3768	Oc1cnccc1c1nccs1	B3-B11-B14	1435.38
251	3788	Oc1ncc(nc1C1CCCC1)C	B3-B12-B10-B1	1143.18
252	3797	Oc1ncccc1c1cncs1	B3-B11-B14	1438.92
253	3830	SC1CCC(C1)c1ccccc1	B2-B10-B5	1113.21
254	3833	Sc1ccc(o1)c1cnccn1	B2-B15-B12	1410.21
255	3842	Sc1cocc1c1cnccn1	B2-B15-B12	1432.08
256	3845	Sc1occ(c1)c1cnccn1	B2-B15-B12	1418.91
257	3856	c1cnc(cn1)Cc1nsnc1	B1-B12-B13	1421.46
258	3871	C1CCC(C1)OOc1cccnc1	B3-B3-B10-B11	1154.09
259	3894	CCc1coc(c1)c1cncs1	B1-B15-B14-B1	1264.36
260	3944	Cc1coc(c1)c1csc(n1)C	B1-B15-B14-B1	1257.01
261	3973	Cc1nccnc1N1CNCNC1	B1-B12-B9	1312.29
262	3978	Cc1oc(c(c1)c1nccs1)C	B1-B15-B14-B1	1277.41
263	3990	Cc1occ(c1)c1scnc1C	B1-B14-B15-B1	1284.85
264	3999	Cc1occc1Cc1nccs1	B1-B15-B14-B1	1249.27
265	4001	Cc1occc1c1scnc1C	B1-B14-B15-B1	1317.41
266	4022	OC1(CCCC1)c1cccc(n1)O	B3-B10-B11-B3	1211.67
267	4049	OC1CCC(C1)c1ccncc1O	B3-B10-B11-B3	1235.98
268	4068	OC1CCCC1c1cccnc1O	B3-B10-B11-B3	1224.43
269	4083	OOC1(CCCC1)c1ccncc1	B3-B3-B10-B11	1183.62
270	4095	OOc1ccncc1C1CCCC1	B3-B11-B10-B3	1175.83
271	4104	Oc1cc(cc(n1)O)C1CCCC1	B3-B11-B10-B3	1214.54
272	4146	Oc1cncc(c1)c1nsnc1	B3-B11-B13	1538.68
273	4156	Oc1nc(ccc1O)C1CCCC1	B3-B11-B10-B3	1215.29
274	4165	Oc1ncccc1C1(O)CCCC1	B3-B10-B11-B3	1229.52
275	4169	Oc1nccnc1c1cncs1	B3-B12-B14	1516.28
276	4173	Oc1nnc(s1)c1ccccn1	B3-B8-B11	1485.44
277	4179	Oc1scc(n1)c1nccnc1	B3-B14-B12	1511.56
278	4199	Sc1ncccc1C1CCCC1	B2-B11-B10	1186.33
279	4215	C1CCC(C1)CCc1cccs1	B1-B10-B1-B7	1043.11
280	4268	CCC1CCC(C1)c1cscc1	B1-B10-B1-B7	1052.76
281	4270	CCC1CCCC1c1cscc1	B1-B10-B1-B7	1050.57
282	4276	CCc1ccsc1C1CCCC1	B1-B7-B10-B1	1067.36
283	4278	CCc1coc(c1)c1nsnc1	B1-B15-B13-B1	1332.45
284	4283	CCc1nnc(s1)c1ccco1	B1-B8-B1-B15	1306.21
285	4294	COc1ccc(o1)c1cscc1	B3-B15-B1-B7	1321.1
286	4313	COc1scc(c1)c1ccco1	B3-B7-B1-B15	1336.01
287	4386	Cc1ccsc1Oc1cocc1	B3-B7-B1-B15	1305.59
288	4414	Cc1coc(c1c1cocc1)S	B1-B15-B2-B15	1377.28
289	4427	Cc1csc(c1)CC1CCCC1	B1-B10-B7-B1	1042.41
290	4433	Cc1csc(c1)c1occc1O	B1-B7-B15-B3	1347.65
291	4450	Cc1oc(c(c1)c1ccco1)S	B1-B15-B2-B15	1327.27
292	4457	Cc1oc(cc1C)c1scnn1	B1-B15-B8-B1	1322.22
293	4469	Cc1occ(c1)c1csc(c1)O	B1-B15-B7-B3	1339.85
294	4471	Cc1occ(c1)c1nnc(s1)C	B1-B8-B15-B1	1300.17
295	4483	Cc1occ(c1c1cnsn1)C	B1-B15-B13-B1	1387.78
296	4498	Cc1sc(cc1C)C1CCCC1	B1-B7-B10-B1	1043.05
297	4502	Cc1scc(c1)Oc1ccco1	B3-B7-B1-B15	1285.84
298	4522	OC(c1ccsc1)c1ccoc1	B1-B15-B7-B3	1331.56
299	4537	OC1CCC(C1)c1cncc(n1)O	B3-B10-B12-B3	1283.26
300	4549	OC1NCNC(N1)c1cccnc1	B3-B9-B11	1386.53
301	4556	OCc1ccc(s1)c1ccco1	B1-B7-B15-B3	1341.61
302	4557	OCc1ccc(s1)c1cocc1	B1-B7-B15-B3	1350.53
303	4584	ON1CNCNC1c1ccccn1	B3-B9-B11	1364.94
304	4590	OOc1cncc(n1)C1CCCC1	B3-B12-B10-B3	1223.8
305	4593	Oc1cc(c(o1)c1cccs1)C	B1-B15-B7-B3	1353.83
306	4596	Oc1cc(c(s1)c1cocc1)C	B1-B7-B15-B3	1367.93
307	4607	Oc1ccc(o1)c1ccc(s1)C	B1-B7-B15-B3	1322.73
308	4610	Oc1ccc(o1)c1cscc1C	B1-B7-B15-B3	1366.18
309	4618	Oc1cccc(n1)N1CNCNC1	B9-B11-B3	1390.51
310	4620	Oc1cccnc1N1CNCNC1	B9-B11-B3	1393.46
311	4633	Oc1cnc(cn1)c1cnsn1	B3-B12-B13	1616.07
312	4652	Oc1coc(c1c1cscc1)C	B1-B15-B7-B3	1390.99
313	4663	Oc1csc(c1C)c1cocc1	B1-B7-B15-B3	1378
314	4675	Oc1nccnc1C1(O)CCCC1	B3-B10-B12-B3	1282.45
315	4685	Oc1occ(c1)c1ccc(s1)C	B1-B7-B15-B3	1324.33
316	4699	Oc1scc(c1)Cc1ccco1	B1-B15-B7-B3	1319.05
317	4701	Oc1scc(c1)c1ccoc1C	B1-B15-B7-B3	1376.04
318	4708	Oc1sccc1Cc1ccoc1	B1-B15-B7-B3	1325.01
319	4717	SCc1ccc(o1)c1cocc1	B1-B15-B2-B15	1334.17
320	4720	SCc1coc(c1)c1ccco1	B1-B15-B2-B15	1321.59
321	4743	Sc1coc(c1)Cc1cocc1	B1-B15-B2-B15	1301.32
322	4758	Sc1occ(c1)Cc1ccco1	B1-B15-B2-B15	1296.81
323	4776	o1ccc(c1)CCc1cnsn1	B1-B13-B1-B15	1330.2
324	4816	CC1(CCCC1)c1ncc(s1)C	B1-B10-B14-B1	1096.67
325	4817	CC1(CCCC1)c1ncsc1C	B1-B10-B14-B1	1126.72
326	4866	CC1NCN(C(N1)c1ccco1)C	B1-B9-B15-B1	1234.9
327	4881	CC1NCNC(N1)c1ccoc1C	B1-B9-B15-B1	1223.87
328	4911	CCC1NCNCN1c1cocc1	B1-B9-B15-B1	1234.9
329	4965	CN1CNCN(C1)c1occc1C	B1-B9-B15-B1	1237.43
330	5043	Cc1cnc(s1)c1ccoc1O	B3-B15-B14-B1	1406.48
331	5061	Cc1coc(c1c1cncs1)O	B3-B15-B14-B1	1452.35
332	5079	Cc1nc(c(s1)c1ccco1)O	B3-B14-B15-B1	1411.37
333	5096	Cc1oc(c(c1)c1nccs1)O	B3-B15-B14-B1	1411.73
334	5109	Cc1occ(c1)c1ncc(s1)O	B3-B14-B15-B1	1397.28
335	5115	Cc1occ(c1O)c1cscn1	B3-B15-B14-B1	1420.56
336	5124	Cc1sc(c(n1)c1cocc1)O	B3-B14-B15-B1	1413.84
337	5150	OCc1ccc(o1)c1cncs1	B1-B15-B14-B3	1415.71
338	5152	OCc1ccc(o1)c1nccs1	B1-B15-B14-B3	1419.04
339	5204	Oc1cnc(s1)c1ccoc1C	B3-B14-B15-B1	1427.91
340	5228	Oc1cocc1c1scnc1C	B3-B15-B14-B1	1457.37
341	5229	Oc1csc(n1)Cc1ccco1	B1-B15-B14-B3	1382.76
342	5242	Oc1ncc(s1)Cc1ccco1	B1-B15-B14-B3	1377.54
343	5254	Oc1oc(c(c1)c1nccs1)C	B3-B15-B14-B1	1426.35
344	5260	Oc1occ(c1)c1ncc(s1)C	B3-B15-B14-B1	1391.64
345	5270	Oc1sc(c(n1)c1ccco1)C	B3-B14-B15-B1	1422.28
346	5346	CC1CCC(C1)(S)c1ccco1	B1-B10-B2-B15	1154.86
347	5350	CC1CCC(C1)Oc1cccs1	B1-B10-B3-B7	1121.78
348	5354	CC1CCC(C1)c1ccc(o1)S	B10-B15-B2-B1	1137.75
349	5375	CC1CCC(C1c1ccsc1)O	B1-B10-B3-B7	1164.53
350	5385	CC1CCCC1Cc1nsnc1	B1-B10-B1-B13	1157.93
351	5407	CCC1CCC(C1)c1nsnc1	B1-B10-B1-B13	1161.95
352	5422	COc1ccc(o1)c1nsnc1	B3-B15-B1-B13	1478.23
353	5446	CSC1CCC(C1)c1cocc1	B2-B10-B1-B15	1137.56
354	5452	CSc1cocc1C1CCCC1	B2-B15-B1-B10	1145.65
355	5464	Cc1cc(oc1C1CCCC1)S	B1-B15-B2-B10	1139.21
356	5477	Cc1ccc(o1)Oc1nncs1	B1-B15-B3-B8	1411.88
357	5488	Cc1ccccc1c1ccccc1C	B1-B5-B5-B1	1009.21
358	5495	Cc1ccsc1OC1CCCC1	B3-B7-B1-B10	1122.37
359	5499	Cc1coc(c1)c1nsnc1O	B3-B13-B15-B1	1490.92
360	5500	Cc1coc(c1C1CCCC1)S	B1-B15-B2-B10	1151.36
361	5513	Cc1nnc(s1)Oc1ccco1	B3-B8-B1-B15	1407.72
362	5530	Cc1occ(c1)c1nsnc1O	B3-B13-B15-B1	1502.14
363	5554	OC1CC(CC1C)c1cccs1	B1-B10-B3-B7	1154.97
364	5562	OC1CCC(C1)c1csc(c1)C	B7-B10-B3-B1	1164.63
365	5566	OC1CCC(C1C)c1cccs1	B1-B10-B3-B7	1163.73
366	5577	OC1CCCC1c1sccc1C	B7-B10-B3-B1	1167.99
367	5585	OCc1ccc(o1)c1nsnc1	B1-B15-B3-B13	1504.48
368	5603	OCc1occc1c1nsnc1	B1-B15-B3-B13	1539.94
369	5646	Oc1cc(c(o1)c1cocc1)S	B3-B15-B2-B15	1504.4
370	5662	Oc1ccc(o1)Oc1cscc1	B3-B15-B3-B7	1444.98
371	5669	Oc1ccc(o1)c1coc(c1)S	B15-B15-B2-B3	1470.09
372	5686	Oc1ccoc1Sc1ccco1	B3-B15-B2-B15	1455.33
373	5692	Oc1ccoc1c1occc1S	B15-B15-B2-B3	1501.85
374	5708	Oc1coc(c1)c1cocc1S	B15-B15-B2-B3	1497.31
375	5713	Oc1coc(c1)c1occc1S	B15-B15-B2-B3	1497.11
376	5720	Oc1coc(c1S)c1ccco1	B3-B15-B2-B15	1510.51
377	5740	Oc1csc(c1)c1ccoc1O	B3-B7-B15-B3	1509.6
378	5744	Oc1csc(c1O)c1ccco1	B3-B7-B3-B15	1523.32
379	5745	Oc1csc(c1O)c1cocc1	B3-B7-B3-B15	1522.74
380	5754	Oc1nsnc1Cc1ccco1	B3-B13-B1-B15	1477.22
381	5773	Oc1occ(c1)c1ccsc1O	B3-B15-B7-B3	1517.03
382	5800	Oc1occc1c1cocc1S	B15-B15-B2-B3	1531.08
383	5829	SC1(CCCC1)Cc1cocc1	B1-B10-B2-B15	1160.37
384	5830	SC1(CCCC1)c1ccc(o1)C	B10-B15-B2-B1	1146.56
385	5844	SC1CCC(C1)c1coc(c1)C	B10-B15-B2-B1	1144.85
386	5859	SC1CCCC1c1occc1C	B10-B15-B2-B1	1150.52
387	5872	SOc1ccc(o1)c1ccco1	B2-B3-B15-B15	1436.67
388	5877	SOc1coc(c1)c1cocc1	B2-B3-B15-B15	1453.8
389	5881	SOc1occ(c1)c1cocc1	B2-B3-B15-B15	1453.47
390	5894	Sc1ccc(o1)Oc1cocc1	B3-B15-B2-B15	1429.33
391	5903	Sc1ccoc1c1ccoc1O	B15-B15-B2-B3	1521.33
392	5926	Sc1occ(c1)c1ccoc1O	B15-B15-B2-B3	1483.09
393	5933	Sc1occc1Oc1ccco1	B3-B15-B2-B15	1433.51
394	5957	C1CCC(C1)OCc1ncsc1	B1-B3-B10-B14	1192.53
395	5962	C1NCN(CN1)Cc1cccs1	B1-B9-B7	1324.2
396	5963	C1NCN(CN1)Cc1cscc1	B1-B9-B7	1333.52
397	5965	C1NCN(CN1)OCc1cocc1	B1-B15-B3-B9	1324.39
398	5975	CC1(C)NCN(CN1)C1CCCC1	B1-B9-B10-B1	1074.33
399	5984	CC1(CCCC1)c1cnc(s1)O	B3-B14-B10-B1	1222.24
400	6007	CC1(O)NCNC(N1)c1ccco1	B3-B9-B15-B1	1357.91
401	6008	CC1(O)NCNC(N1)c1cocc1	B3-B9-B15-B1	1364.44
402	6040	CC1CCC(C1)c1ncsc1O	B3-B14-B10-B1	1212.75
403	6043	CC1CCC(C1C)C1NCNCN1	B1-B10-B9-B1	1098.91
404	6120	CC1NCNCN1c1coc(c1)O	B3-B15-B9-B1	1369.19
405	6128	CCC1CCC(C1)N1CNCNC1	B1-B10-B9-B1	1082.88
406	6130	CCC1CCCC1N1CNCNC1	B1-B10-B9-B1	1093.75
407	6140	CCc1ccc(cn1)c1ccccc1	B1-B11-B5-B1	1079.41
408	6146	CCc1ccccc1c1ccccn1	B1-B5-B11-B1	1067.87
409	6149	CCc1cccnc1c1ccccc1	B1-B11-B5-B1	1065.52
410	6170	CN1CNC(N(C1)c1cocc1)O	B3-B9-B15-B1	1357.9
411	6173	CN1CNC(NC1)(O)c1cocc1	B3-B9-B15-B1	1367.82
412	6193	CN1CNCN(C1)CC1CCCC1	B1-B10-B9-B1	1076.72
413	6201	CN1CNCN(C1)c1cscc1	B1-B9-B7	1331.5
414	6206	CN1CNCN(C1O)c1ccco1	B3-B9-B15-B1	1351.84
415	6211	CN1CNCNC1(O)c1ccco1	B3-B9-B15-B1	1366.61
416	6216	CN1CNCNC1Oc1ccco1	B3-B15-B9-B1	1338.18
417	6219	CN1CNCNC1c1cccs1	B1-B9-B7	1328.57
418	6220	CN1CNCNC1c1ccoc1O	B3-B15-B9-B1	1381.06
419	6252	COc1ccoc1N1CNCNC1	B3-B15-B9-B1	1367.62
420	6253	COc1cnc(s1)C1CCCC1	B3-B14-B10-B1	1197.83
421	6274	Cc1c(coc1O)N1CNCNC1	B3-B15-B9-B1	1377.61
422	6275	Cc1cc(C)cc(c1)c1ccccn1	B1-B5-B11-B1	1082.18
423	6295	Cc1ccc(cc1)c1ccc(nc1)C	B1-B5-B11-B1	1083.72
424	6314	Cc1ccc(o1)OC1NCNCN1	B3-B15-B9-B1	1336.54
425	6321	Cc1cccc(c1)c1cccc(n1)C	B1-B5-B11-B1	1075.24
426	6325	Cc1cccc(c1)c1cncc(c1)C	B1-B5-B11-B1	1087.2
427	6332	Cc1cccc(n1)c1ccccc1C	B1-B11-B5-B1	1069.81
428	6343	Cc1ccnc(c1C)c1ccccc1	B1-B11-B5-B1	1082.36
429	6431	OC1CCC(C1)(C)c1cncs1	B10-B14-B3-B1	1235.22
430	6442	OC1CCC(C1)c1scnc1C	B10-B14-B3-B1	1231.38
431	6465	OC1NCN(CN1)c1cocc1C	B3-B9-B15-B1	1371.77
432	6485	OCC1(CCCC1)c1nccs1	B1-B10-B14-B3	1233.25
433	6486	OCC1(CCCC1)c1ncsc1	B1-B10-B14-B3	1232.24
434	6488	OCC1(NCNCN1)c1ccco1	B1-B9-B15-B3	1386.92
435	6495	OCC1CCCC1c1nccs1	B1-B10-B14-B3	1217.75
436	6516	OCc1cocc1N1CNCNC1	B1-B15-B9-B3	1395.06
437	6521	OCc1occ(c1)N1CNCNC1	B1-B15-B9-B3	1392.12
438	6526	ON1C(C)NCNC1c1ccco1	B3-B9-B15-B1	1335.07
439	6561	ON1CNCNC1c1ccoc1C	B3-B9-B15-B1	1357.66
440	6568	OOc1ccc(o1)c1nccs1	B3-B15-B14-B3	1504.27
441	6582	OOc1ncc(s1)c1ccco1	B3-B14-B15-B3	1501.71
442	6602	Oc1cc(c(o1)c1nccs1)O	B3-B15-B14-B3	1585.77
443	6626	Oc1cnc(s1)c1ccoc1O	B3-B14-B15-B3	1583.3
444	6634	Oc1coc(c1)Oc1nccs1	B3-B15-B14-B3	1525.07
445	6679	Oc1oc(cc1O)c1ncsc1	B3-B15-B14-B3	1575.53
446	6684	Oc1occ(c1)Oc1cncs1	B3-B15-B14-B3	1538.88
447	6691	Oc1occ(c1)c1scc(n1)O	B3-B14-B15-B3	1568.65
448	6711	Oc1scc(n1)CC1CCCC1	B1-B10-B14-B3	1204.34
449	6720	Oc1scnc1Oc1cocc1	B3-B15-B14-B3	1534.62
450	6722	c1ccc(cc1)CCc1ccccn1	B1-B1-B5-B11	1053.35
451	6750	CC1(CCCC1)C1(S)CCCC1	B10-B10-B2-B1	1050.9
452	6753	CC1(CCCC1)SC1CCCC1	B1-B10-B2-B10	1004.29
453	6766	CC1C(CCC1O)c1nncs1	B1-B10-B3-B8	1267.28
454	6802	CC1NCNC(N1)c1cncs1	B1-B9-B14	1385.02
455	6822	CCc1cccnc1c1ccncc1	B1-B11-B11-B1	1129.85
456	6892	Cc1ccc(cc1)c1ccccc1O	B3-B5-B5-B1	1128.15
457	6913	Cc1ccc(nc1)c1ccc(cn1)C	B1-B11-B11-B1	1120.73
458	6958	Cc1ccnc(c1)c1cnccc1C	B1-B11-B11-B1	1124.95
459	6963	Cc1ccnc(c1c1ccccn1)C	B1-B11-B11-B1	1115.38
460	6981	Cc1cnc(cc1C)c1ccncc1	B1-B11-B11-B1	1141.7
461	6991	Cc1cncc(c1)c1ccncc1C	B1-B11-B11-B1	1128.82
462	7007	Cc1cnccc1c1cnccc1C	B1-B11-B11-B1	1117.74
463	7018	Cc1ncc(c(c1)c1cccnc1)C	B1-B11-B11-B1	1129.11
464	7026	Cc1nccc(c1)Cc1ccccn1	B1-B11-B11-B1	1122.55
465	7040	Cc1ncccc1c1ccncc1C	B1-B11-B11-B1	1118.06
466	7044	Cc1ncsc1C1NCNCN1	B9-B14-B1	1401.77
467	7055	N1CNCN(C1)Cc1ncsc1	B1-B9-B14	1387.81
468	7058	OC(c1cnsn1)C1CCCC1	B1-B13-B3-B10	1285.27
469	7091	OC1CC(CC1O)c1cscc1	B3-B10-B3-B7	1288.13
470	7117	OC1CCC(C1)c1sccc1O	B7-B10-B3-B3	1290.45
471	7131	OC1CCCC1(S)c1cocc1	B2-B10-B3-B15	1285.1
472	7143	OC1CCCC1c1cocc1S	B10-B15-B2-B3	1273.9
473	7145	OC1CCCC1c1cscc1O	B7-B10-B3-B3	1288.08
474	7154	OCC1CCC(C1)c1nncs1	B1-B10-B3-B8	1272.94
475	7155	OCC1CCC(C1)c1nsnc1	B1-B10-B3-B13	1293.4
476	7164	OOC1(CCCC1)c1cscc1	B3-B3-B10-B7	1238.89
477	7175	OOc1coc(c1)c1nncs1	B3-B15-B3-B8	1576.61
478	7177	OOc1cocc1c1nncs1	B3-B15-B3-B8	1594.8
479	7181	OOc1nnc(s1)c1ccco1	B3-B8-B3-B15	1570.41
480	7183	OOc1nsnc1c1ccco1	B3-B13-B3-B15	1613.86
481	7186	OOc1occ(c1)c1nsnc1	B3-B15-B3-B13	1607.53
482	7247	Oc1csc(c1)OC1CCCC1	B3-B7-B3-B10	1248.53
483	7252	Oc1nnc(s1)c1ccoc1O	B3-B8-B15-B3	1647.17
484	7270	Oc1occ(c1O)c1nncs1	B3-B15-B3-B8	1657.52
485	7308	SC1CCC(C1)c1coc(c1)O	B10-B15-B2-B3	1275.75
486	7309	SC1CCC(C1)c1cocc1O	B10-B15-B2-B3	1278.2
487	7349	Sc1ccoc1OC1CCCC1	B3-B15-B2-B10	1228.06
488	7377	C1NCN(CN1)Oc1cscc1	B3-B9-B7	1420.42
489	7380	CC(c1cnccn1)c1ccccn1	B1-B12-B11-B1	1173.82
490	7389	CC1(O)CCC(C1)C1NCNCN1	B1-B10-B9-B3	1189.68
491	7404	CC1CCC(C1)N1CNCN(C1)O	B1-B10-B9-B3	1169.03
492	7418	CC1NC(O)NC(N1)C1CCCC1	B1-B9-B10-B3	1176.49
493	7434	CC1NCNCN1OC1CCCC1	B3-B9-B10-B1	1143.09
494	7442	CCc1ccncc1c1cnccn1	B1-B11-B12-B1	1180.01
495	7482	COC1(CCCC1)C1NCNCN1	B9-B10-B3-B1	1205.02
496	7484	COC1(NCNCN1)C1CCCC1	B3-B9-B10-B1	1184.38
497	7504	COc1ccccc1c1ccccn1	B3-B5-B11-B1	1172.71
498	7506	COc1ccccc1c1ccncc1	B3-B5-B11-B1	1180.15
499	7628	Cc1cncc(c1)Cc1nccnc1	B1-B12-B11-B1	1174.84
500	7657	Cc1ncc(nc1)c1cncc(c1)C	B1-B12-B11-B1	1181.25
501	7659	Cc1ncc(nc1C)c1ccccn1	B1-B12-B11-B1	1169.86
502	7664	Cc1nccc(c1)c1cncc(n1)C	B1-B12-B11-B1	1174.6
503	7690	OC(N1CNCNC1)C1CCCC1	B1-B10-B9-B3	1199.02
504	7703	OC1(CCCC1)c1ncsc1O	B10-B14-B3-B3	1351.69
505	7763	OC1CCC(C1O)c1nccs1	B10-B14-B3-B3	1351.2
506	7766	OC1CCC(C1c1scnc1)O	B10-B14-B3-B3	1356.42
507	7776	OC1CCCC1Oc1cncs1	B3-B14-B10-B3	1322.06
508	7837	OCC1(NCNCN1)C1CCCC1	B1-B9-B10-B3	1213.25
509	7854	OCc1cccc(c1)c1cccnc1	B1-B5-B11-B3	1201.19
510	7860	OCc1cccnc1c1ccccc1	B1-B11-B5-B3	1192.24
511	7867	ON1C(C)NCNC1C1CCCC1	B1-B9-B10-B3	1155.62
512	7883	ON1CNC(NC1)(O)c1cocc1	B3-B9-B15-B3	1491.26
513	7929	ON1CNCNC1c1ccoc1O	B3-B9-B15-B3	1504.77
514	7930	ON1CNCNC1c1coc(c1)O	B3-B9-B15-B3	1511.74
515	7936	OOC1(CCCC1)c1ncsc1	B10-B14-B3-B3	1300.78
516	7949	OOC1NCNC(N1)c1cocc1	B3-B9-B15-B3	1469.11
517	7956	OON1CNCNC1c1ccco1	B3-B9-B15-B3	1434.35
518	7997	Oc1ccc(cc1)Cc1ccncc1	B1-B11-B5-B3	1172.23
519	8017	Oc1ccc(o1)OC1NCNCN1	B3-B15-B9-B3	1491.72
520	8044	Oc1ccnc(c1c1ccccc1)C	B1-B11-B5-B3	1173.71
521	8060	Oc1coc(c1)OC1NCNCN1	B3-B15-B9-B3	1496.75
522	8072	Oc1ncc(cc1C)c1ccccc1	B1-B11-B5-B3	1196.08
523	8073	Oc1ncc(s1)OC1CCCC1	B3-B14-B10-B3	1311.15
524	8087	Oc1occc1OC1NCNCN1	B3-B15-B9-B3	1494.23
525	8092	Oc1scc(c1)N1CNCNC1	B3-B7-B9	1478.96
526	8103	SC1NCNCN1c1ccco1	B2-B9-B15	1448.43
527	8118	Sc1cocc1N1CNCNC1	B2-B15-B9	1473.26
528	8150	CN1CNCN(C1)C1NCNCN1	B1-B9-B9	1344.55
529	8172	COc1ccncc1c1ccccn1	B1-B3-B11-B11	1232.88
530	8189	COc1nccnc1c1ccccc1	B3-B12-B1-B5	1230.38
531	8198	Cc1cc(O)nc(c1)c1ccncc1	B1-B11-B3-B11	1247.97
532	8219	Cc1ccc(cn1)c1ccncc1O	B3-B11-B11-B1	1243.99
533	8251	Cc1ccccc1Oc1cnccn1	B3-B5-B1-B12	1204.11
534	8275	Cc1ccncc1Oc1ccccn1	B1-B11-B3-B11	1195.97
535	8278	Cc1ccncc1c1cccnc1O	B3-B11-B11-B1	1231.24
536	8287	Cc1cnc(c(n1)C)c1cnccn1	B1-B12-B1-B12	1231.78
537	8333	Cc1ncc(cc1O)c1cccnc1	B1-B11-B3-B11	1255.12
538	8356	N1CNC(NC1)CC1NCNCN1	B1-B9-B9	1369.91
539	8388	OC1CC(C(C1)C1CCCC1)S	B2-B10-B3-B10	1126.47
540	8402	OC1CCC(C1)c1nnc(s1)O	B8-B10-B3-B3	1399.17
541	8414	OC1CCCC1Oc1nsnc1	B3-B10-B3-B13	1407.1
542	8440	OCc1cccnc1c1cccnc1	B1-B3-B11-B11	1253.79
543	8492	Oc1cc(C)nc(c1)c1ccccn1	B1-B11-B3-B11	1233.28
544	8569	Oc1ccnc(c1)c1cccnc1C	B3-B11-B11-B1	1234.68
545	8575	Oc1ccnc(c1C)c1cccnc1	B1-B11-B3-B11	1249.21
546	8612	Oc1cncc(c1C)c1ccncc1	B1-B11-B3-B11	1256.67
547	8633	Oc1nccc(c1)Cc1ccccn1	B1-B11-B3-B11	1226.09
548	8634	Oc1nccc(c1)Cc1cccnc1	B1-B11-B3-B11	1230.48
549	8638	Oc1nccc(c1)c1ccncc1C	B3-B11-B11-B1	1242
550	8644	Oc1ncccc1Cc1ccncc1	B1-B11-B3-B11	1234.52
551	8659	SC1CC(CC1O)C1CCCC1	B2-B10-B3-B10	1121.69
552	8661	SC1CCC(C1)C1(O)CCCC1	B10-B10-B2-B3	1123.46
553	8665	SC1CCCC1(O)C1CCCC1	B2-B10-B3-B10	1132.3
554	8674	c1ccc(cc1)COc1cnccn1	B3-B12-B1-B5	1208.5
555	8686	n1ccc(cc1)OCc1ccncc1	B1-B3-B11-B11	1220.71
556	8692	COc1cccc(n1)c1cnccn1	B3-B11-B12-B1	1280.68
557	8738	Cc1cnc(c(n1)O)c1cccnc1	B1-B12-B3-B11	1299
558	8750	Cc1cnc(cn1)c1ccncc1O	B3-B11-B12-B1	1299.72
559	8765	Cc1cncc(n1)c1ncccc1O	B3-B11-B12-B1	1292.65
560	8779	Cc1ncccc1c1nccnc1O	B3-B12-B11-B1	1288.75
561	8780	Cc1nccnc1Oc1ccccn1	B1-B12-B3-B11	1257.26
562	8811	OC1CCC(C1)C1(O)NCNCN1	B3-B9-B10-B3	1320.76
563	8823	OC1CCCC1(O)N1CNCNC1	B9-B10-B3-B3	1317.04
564	8844	OC1NCNCN1C1(O)CCCC1	B9-B10-B3-B3	1303.81
565	8863	OCc1ncccc1c1nccnc1	B1-B11-B12-B3	1311.04
566	8879	ON1CNC(NC1O)C1CCCC1	B3-B9-B3-B10	1283.74
567	8884	ON1CNCN(C1)c1nsnc1	B9-B13-B3	1606.97
568	8904	OON1CNCN(C1)C1CCCC1	B3-B9-B3-B10	1236.58
569	8906	OOc1ccc(cc1)c1ccccn1	B3-B5-B3-B11	1264.99
570	8915	OOc1ccccc1c1ccccn1	B3-B5-B3-B11	1254.76
571	8917	OOc1ccccc1c1ccncc1	B3-B5-B3-B11	1265.95
572	8919	OOc1ccnc(c1)c1ccccc1	B3-B11-B5-B3	1262.02
573	8939	Oc1ccc(c(c1)c1ccccn1)O	B3-B5-B3-B11	1311.31
574	8942	Oc1ccc(c(n1)C)c1cnccn1	B3-B11-B12-B1	1307.35
575	9015	Oc1ccncc1Cc1cnccn1	B1-B12-B11-B3	1296.72
576	9023	Oc1cnc(c(n1)C)c1ccccn1	B1-B12-B3-B11	1292.77
577	9030	Oc1cnc(cc1O)c1ccccc1	B3-B11-B5-B3	1314.81
578	9049	Oc1cncc(n1)Cc1cccnc1	B1-B12-B3-B11	1281.64
579	9061	Oc1ncc(c(c1)C)c1cnccn1	B3-B11-B12-B1	1304.26
580	9072	Oc1nccc(c1)c1nccnc1C	B3-B11-B12-B1	1303.16
581	9074	Oc1ncccc1Cc1nccnc1	B1-B12-B11-B3	1292.51
582	9103	Sc1cccc(c1)c1cccnc1	B2-B5-B11	1258.85
583	9139	CC(c1nncs1)c1cnccn1	B1-B12-B1-B8	1350.35
584	9176	CC1NC(C)NC(N1)c1cccnc1	B1-B9-B11-B1	1193.62
585	9185	CC1NCN(CN1)Cc1cccnc1	B1-B9-B11-B1	1214.65
586	9216	CC1NCNC(N1c1cccnc1)C	B1-B9-B11-B1	1196.65
587	9218	CC1NCNCN1Cc1ccccn1	B1-B9-B11-B1	1212.99
588	9235	CCC1NCNC(N1)c1cccnc1	B1-B9-B11-B1	1206.99
589	9273	CCc1nccnc1c1nncs1	B1-B12-B1-B8	1347.95
590	9279	CN1CN(C)CN(C1)c1ccccn1	B1-B9-B11-B1	1211.04
591	9291	CN1CNC(NC1)(C)c1cccnc1	B1-B9-B11-B1	1210.83
592	9296	CN1CNC(NC1)c1ccc(cn1)C	B1-B9-B11-B1	1216.4
593	9297	CN1CNC(NC1)c1ccc(nc1)C	B1-B9-B11-B1	1218.79
594	9310	CN1CNCN(C1)Cc1cccnc1	B1-B9-B11-B1	1205.16
595	9318	CN1CNCN(C1)c1cncc(c1)C	B1-B9-B11-B1	1220.45
596	9320	CN1CNCN(C1)c1nccc(c1)C	B1-B9-B11-B1	1214.68
597	9329	CN1CNCNC1(C)c1ccncc1	B1-B9-B11-B1	1225.14
598	9334	CN1CNCNC1c1ccc(nc1)C	B1-B9-B11-B1	1216.23
599	9367	COc1ccncc1c1nccs1	B1-B3-B11-B14	1364.05
600	9378	COc1cncc(n1)c1cscc1	B3-B12-B1-B7	1361.67
601	9410	COc1scnc1c1ccncc1	B3-B14-B11-B1	1359.43
602	9421	CSc1cncc(n1)c1ccco1	B2-B12-B1-B15	1337.49
603	9438	Cc1cc(C)ncc1C1NCNCN1	B9-B11-B1-B1	1218.73
604	9459	Cc1ccc(c(n1)O)c1cncs1	B1-B11-B3-B14	1376.54
605	9470	Cc1ccc(cc1C1CCCC1)S	B1-B5-B10-B2	1108.13
606	9478	Cc1ccc(cn1)Oc1cscn1	B1-B11-B3-B14	1320.65
607	9498	Cc1ccc(nc1)c1scnc1O	B3-B14-B11-B1	1368.05
608	9510	Cc1cccc(c1)Oc1nsnc1	B3-B5-B1-B13	1341.72
609	9545	Cc1ccnc(c1)Oc1cncs1	B1-B11-B3-B14	1322.91
610	9561	Cc1ccnc(c1c1ncsc1)O	B1-B11-B3-B14	1365.03
611	9585	Cc1cnc(c(n1)c1ccco1)S	B1-B12-B15-B2	1357.49
612	9593	Cc1cnc(cc1O)c1cncs1	B1-B11-B3-B14	1380.99
613	9614	Cc1cnc(s1)Oc1ccncc1	B3-B14-B11-B1	1313.61
614	9632	Cc1cncc(c1C1NCNCN1)C	B9-B11-B1-B1	1224.59
615	9652	Cc1cncc(n1)c1csc(c1)O	B3-B7-B12-B1	1369.15
616	9659	Cc1cnccc1CC1NCNCN1	B1-B9-B11-B1	1233.02
617	9675	Cc1csc(c1)c1cncc(n1)O	B3-B12-B7-B1	1369
618	9706	Cc1ncc(c(c1)c1scnc1)O	B1-B11-B3-B14	1375.8
619	9733	Cc1nccc(c1)Oc1cscn1	B1-B11-B3-B14	1324.26
620	9743	Cc1ncccc1CC1NCNCN1	B1-B9-B11-B1	1233.25
621	9748	Cc1ncccc1c1ncsc1O	B3-B14-B11-B1	1363.15
622	9785	Cc1scc(n1)Oc1cccnc1	B3-B14-B11-B1	1322.21
623	9787	Cc1scc(n1)c1cccc(n1)O	B3-B11-B14-B1	1361.18
624	9798	N1CNC(NC1)CCc1ccncc1	B1-B1-B11-B9	1217.26
625	9800	OC(c1cncs1)c1ccccn1	B1-B3-B11-B14	1364.41
626	9802	OC(c1cncs1)c1ccncc1	B1-B3-B11-B14	1366.89
627	9816	OCc1ccc(cn1)c1nccs1	B1-B3-B11-B14	1383.95
628	9828	OCc1cccnc1c1cncs1	B1-B3-B11-B14	1387.27
629	9846	OCc1cncc(n1)c1cccs1	B1-B12-B3-B7	1381.29
630	9894	OOc1ccc2c(c1S)cccc2	B3-B16-B3-B2	1392.09
631	9930	OSc1ccccc1c1ccoc1	B2-B3-B5-B15	1349.3
632	9935	OSc1occc1c1ccccc1	B2-B3-B15-B5	1329.1
633	9950	Oc1cc(S)cc(c1)c1ccco1	B3-B5-B15-B2	1379.21
634	9955	Oc1cc(oc1S)c1ccccc1	B5-B15-B3-B2	1367.46
635	9958	Oc1cc2cccc(c2c(c1)O)S	B3-B16-B3-B2	1450.34
636	10006	Oc1ccc(cn1)Cc1nccs1	B1-B11-B3-B14	1344.62
637	10015	Oc1ccc(nc1)Cc1nccs1	B1-B11-B3-B14	1348.98
638	10026	Oc1ccc(o1)c1ccccc1S	B5-B15-B3-B2	1358.35
639	10061	Oc1cccc(c1)c1occc1S	B3-B5-B15-B2	1362.14
640	10076	Oc1cccc(n1)Cc1nccs1	B1-B11-B3-B14	1345.83
641	10090	Oc1ccccc1c1ccsc1O	B5-B7-B3-B3	1372.08
642	10106	Oc1ccnc(c1)c1ncc(s1)C	B3-B11-B14-B1	1364.06
643	10127	Oc1cnc(c(c1)c1cncs1)C	B1-B11-B3-B14	1378.05
644	10132	Oc1cnc(c(n1)c1cccs1)C	B1-B12-B3-B7	1364.58
645	10136	Oc1cnc(cc1C)c1nccs1	B1-B11-B3-B14	1373.05
646	10157	Oc1cncc(c1)c1ncsc1C	B3-B11-B14-B1	1363.14
647	10184	Oc1csc(c1)c1cncc(n1)C	B3-B7-B12-B1	1367.83
648	10204	Oc1nc(sc1C)c1ccncc1	B3-B14-B11-B1	1375.87
649	10219	Oc1ncc(s1)c1cccnc1C	B3-B14-B11-B1	1364.18
650	10262	Oc1scc(c1)Cc1cnccn1	B3-B7-B1-B12	1350.36
651	10292	SC1CCC(C1)Cc1ccccc1	B1-B10-B5-B2	1081
652	10339	SOc1cccc2c1cccc2O	B3-B16-B3-B2	1414.69
653	10343	SOc1coc(c1)c1ccccc1	B5-B15-B3-B2	1349.94
654	10355	Sc1cc(oc1O)c1ccccc1	B5-B15-B3-B2	1369.96
655	10363	Sc1ccc(c(c1)O)c1cocc1	B3-B5-B15-B2	1374.77
656	10365	Sc1ccc(c(c1)c1ccoc1)O	B3-B5-B15-B2	1380.74
657	10414	Sc1cccc2c1c(S)ccc2	B2-B16-B2	1400.13
658	10473	Sc1occ(c1)c1nccnc1C	B1-B12-B15-B2	1362.76
659	10496	c1ccc(cn1)OCc1cscn1	B1-B3-B11-B14	1339.52
660	10513	c1cnc(cn1)SCc1cocc1	B2-B12-B1-B15	1333.83
661	10522	C1CCC(C1)CSc1ccncc1	B1-B10-B2-B11	1116.67
662	10547	CC1(O)NCNCN1c1ccccc1	B1-B9-B5-B3	1264.87
663	10594	CC1CCCC1c1ncccc1S	B1-B10-B11-B2	1150.97
664	10596	CC1N(O)CNCN1c1ccccc1	B1-B9-B5-B3	1250.77
665	10599	CC1NCN(C(N1)C)c1cnccn1	B1-B9-B12-B1	1252.15
666	10622	CC1NCNC(N1O)c1ccccc1	B1-B9-B5-B3	1243.84
667	10636	CCN1CNCN(C1)c1cnccn1	B1-B9-B12-B1	1266.12
668	10640	CCc1ncc(nc1)C1NCNCN1	B1-B12-B1-B9	1272.96
669	10646	CN1CN(CNC1C)c1cnccn1	B1-B9-B12-B1	1265.51
670	10652	CN1CNC(NC1)(O)c1ccccc1	B1-B9-B5-B3	1271.77
671	10654	CN1CNC(NC1)Oc1ccccc1	B3-B5-B9-B1	1250.03
672	10669	CN1CNCN(C1)c1cnc(cn1)C	B1-B9-B12-B1	1259.98
673	10695	COc1ccc(nc1)c1nncs1	B1-B3-B11-B8	1419.93
674	10696	COc1ccc(nc1)c1nsnc1	B1-B3-B11-B13	1447.46
675	10704	COc1cccnc1c1nsnc1	B1-B3-B11-B13	1445.56
676	10712	COc1cnc(s1)c1cnccn1	B3-B14-B12-B1	1423.84
677	10731	COc1nnc(s1)c1ccccn1	B3-B8-B1-B11	1404.44
678	10733	COc1nnc(s1)c1ccncc1	B3-B8-B1-B11	1415.08
679	10741	CSC1CCC(C1)c1ccccn1	B2-B10-B1-B11	1121.02
680	10781	Cc1ccc(cc1O)N1CNCNC1	B1-B5-B9-B3	1286.32
681	10810	Cc1ccccc1ON1CNCNC1	B3-B5-B1-B9	1227.7
682	10833	Cc1cnc(c(c1)c1nncs1)O	B1-B11-B8-B3	1427.86
683	10866	Cc1cncc(n1)CC1NCNCN1	B1-B12-B1-B9	1265.35
684	10924	Cc1nccnc1CN1CNCNC1	B1-B12-B1-B9	1273.96
685	10925	Cc1nccnc1Oc1cncs1	B1-B12-B3-B14	1389.35
686	10927	Cc1nccnc1Oc1ncsc1	B1-B12-B3-B14	1390.17
687	10969	OC1NCN(CN1)c1cccc(c1)C	B1-B5-B9-B3	1273
688	10980	OCC1(NCNCN1)c1ccccc1	B1-B9-B5-B3	1299.39
689	10981	OCC1NCN(CN1)c1ccccc1	B1-B9-B5-B3	1286.65
690	10983	OCC1NCNCN1c1ccccc1	B1-B9-B5-B3	1285.27
691	10996	OCc1cccc(n1)c1nsnc1	B1-B11-B13-B3	1459.55
692	11019	OCc1nccc(c1)c1nncs1	B1-B11-B8-B3	1445.08
693	11027	OCc1nnc(s1)c1ccccn1	B1-B8-B11-B3	1423.8
694	11033	OCc1scnc1c1nccnc1	B1-B14-B12-B3	1445.56
695	11054	OOc1ccc(cn1)c1cccs1	B3-B11-B7-B3	1398.74
696	11065	OOc1cccc(n1)c1cscc1	B3-B11-B7-B3	1396.15
697	11081	OOc1cnccc1c1cccs1	B3-B11-B7-B3	1392.26
698	11115	OSc1ccnc(c1)c1ccco1	B2-B3-B11-B15	1401.48
699	11134	OSc1ncccc1c1ccco1	B2-B3-B11-B15	1401.96
700	11143	Oc1c(cccc1C)C1NCNCN1	B1-B5-B9-B3	1298.72
701	11158	Oc1cc(c(s1)c1ccncc1)O	B3-B7-B11-B3	1454.02
702	11163	Oc1ccc(c(c1)C)N1CNCNC1	B1-B5-B9-B3	1276.16
703	11175	Oc1ccc(c(n1)S)c1cocc1	B2-B11-B3-B15	1444.54
704	11185	Oc1ccc(cc1)Oc1nccs1	B3-B5-B14-B3	1395.14
705	11197	Oc1ccc(cc1N1CNCNC1)C	B1-B5-B9-B3	1279.45
706	11220	Oc1ccc(nc1)Cc1nncs1	B1-B8-B11-B3	1405.6
707	11223	Oc1ccc(nc1)Oc1cscc1	B3-B7-B11-B3	1402.25
708	11226	Oc1ccc(nc1)c1ccc(o1)S	B3-B11-B15-B2	1432.73
709	11231	Oc1ccc(nc1)c1cocc1S	B3-B11-B15-B2	1443.39
710	11263	Oc1cccc(c1)N1CNCNC1C	B1-B9-B5-B3	1276.09
711	11288	Oc1cccc(n1)c1ccsc1O	B3-B11-B7-B3	1447.03
712	11318	Oc1ccnc(c1)Cc1nsnc1	B1-B13-B11-B3	1438.24
713	11342	Oc1ccnc(c1c1cccs1)O	B3-B11-B7-B3	1447.77
714	11353	Oc1ccncc1c1ccoc1S	B3-B11-B15-B2	1436.97
715	11363	Oc1ccsc1Oc1ccccn1	B3-B7-B11-B3	1398.79
716	11367	Oc1cnc(c(c1)C)c1nsnc1	B1-B11-B13-B3	1456.64
717	11369	Oc1cnc(c(c1)O)c1cscc1	B3-B11-B7-B3	1449.26
718	11371	Oc1cnc(c(c1)S)c1cocc1	B2-B11-B3-B15	1450.71
719	11402	Oc1cnc(s1)c1nccnc1C	B1-B12-B14-B3	1434.41
720	11403	Oc1cncc(c1)Cc1nncs1	B1-B8-B11-B3	1409.54
721	11412	Oc1cncc(c1)c1ccsc1O	B3-B11-B7-B3	1453.75
722	11414	Oc1cncc(c1)c1cscc1O	B3-B11-B7-B3	1461.31
723	11416	Oc1cncc(c1)c1nsnc1C	B1-B13-B11-B3	1445.29
724	11421	Oc1cncc(c1C)c1nncs1	B1-B11-B8-B3	1432.17
725	11434	Oc1cncc(n1)c1cnc(s1)C	B1-B14-B12-B3	1425.79
726	11463	Oc1coc(c1S)c1ccncc1	B3-B15-B11-B2	1446.95
727	11474	Oc1csc(c1)c1cccnc1O	B3-B7-B11-B3	1452.67
728	11481	Oc1csc(n1)Cc1cnccn1	B1-B12-B14-B3	1417.85
729	11484	Oc1csc(n1)c1nccnc1C	B1-B12-B14-B3	1432.29
730	11495	Oc1ncc(c(c1)C)c1nncs1	B1-B11-B8-B3	1424.51
731	11529	Oc1nccc(c1)c1ccsc1O	B3-B11-B7-B3	1455
732	11574	Oc1oc(c(c1)c1ccccn1)S	B3-B15-B11-B2	1441.99
733	11579	Oc1occ(c1)Sc1ccncc1	B2-B11-B15-B3	1397.6
734	11589	Oc1occ(c1S)c1ccncc1	B3-B15-B11-B2	1447.7
735	11625	Oc1sccc1Oc1cccnc1	B3-B7-B11-B3	1399.59
736	11639	SC1C(C)CCC1c1ccncc1	B1-B10-B11-B2	1146.49
737	11644	SC1CC(CC1C)c1ccncc1	B1-B10-B11-B2	1136.9
738	11650	SC1CCC(C1)Cc1cccnc1	B1-B10-B11-B2	1137.58
739	11678	SC1CCCC1c1nccc(c1)C	B1-B11-B10-B2	1135.58
740	11679	SC1CCCC1c1ncccc1C	B1-B11-B10-B2	1157.4
741	11695	SCc1cncc(c1)C1CCCC1	B1-B11-B10-B2	1145.02
742	11700	SOc1ccc(cn1)c1cocc1	B2-B3-B11-B15	1421.6
743	11704	SOc1ccc(o1)c1cccnc1	B3-B15-B11-B2	1411.86
744	11714	SOc1ccoc1c1ccccn1	B3-B15-B11-B2	1416.28
745	11722	SOc1coc(c1)c1cccnc1	B3-B15-B11-B2	1427.82
746	11726	SOc1cocc1c1ccncc1	B3-B15-B11-B2	1423.86
747	11760	Sc1ccc(cn1)Oc1ccco1	B2-B11-B3-B15	1385.45
748	11783	Sc1ccc(nc1O)c1cocc1	B2-B11-B3-B15	1443.82
749	11833	Sc1ccnc(c1c1ccoc1)O	B2-B11-B3-B15	1443.2
750	11835	Sc1ccncc1Oc1ccco1	B2-B11-B3-B15	1389.95
751	11842	Sc1ccoc1Oc1ccccn1	B3-B15-B11-B2	1380.1
752	11843	Sc1ccoc1Oc1cccnc1	B3-B15-B11-B2	1389.29
753	11871	Sc1cnccc1CC1CCCC1	B1-B10-B11-B2	1145.88
754	11884	Sc1coc(c1)c1cccnc1O	B3-B11-B15-B2	1441.15
755	11894	Sc1cocc1Oc1ccccn1	B3-B15-B11-B2	1388.7
756	11913	Sc1ncc(cc1O)c1cocc1	B2-B11-B3-B15	1456.63
757	11914	Sc1ncc(s1)c1ccccc1	B2-B14-B5	1377.33
758	11944	Sc1occ(c1)c1ccnc(c1)O	B3-B11-B15-B2	1448.49
759	11992	c1ccc(nc1)Sc1cccs1	B2-B7-B11	1333.96
760	12019	C1NCN(CN1)OCc1cccnc1	B1-B3-B11-B9	1296.73
761	12055	CC1CCCC1(S)c1cnccn1	B1-B10-B12-B2	1206.6
762	12072	CC1NCN(CN1)Oc1ccncc1	B3-B9-B11-B1	1289.89
763	12106	CC1NCNCN1Oc1ccncc1	B3-B9-B11-B1	1283.33
764	12109	CC1NCNCN1c1cccnc1O	B1-B9-B11-B3	1333.17
765	12120	CCc1cscc1c1cccs1	B7-B7-B1-B1	1284.77
766	12124	CCc1sccc1c1cccs1	B7-B7-B1-B1	1282.82
767	12126	CN1C(O)NCNC1c1ccccn1	B1-B9-B11-B3	1332.22
768	12145	CN1CNC(NC1)c1ccc(cn1)O	B1-B9-B11-B3	1345.77
769	12151	CN1CNC(NC1)c1cncc(c1)O	B1-B9-B11-B3	1352.81
770	12157	CN1CNC(NC1O)c1ccncc1	B1-B9-B11-B3	1333.26
771	12163	CN1CNCN(C1)c1cccc(n1)O	B1-B9-B11-B3	1333.12
772	12177	CN1CNCNC1(O)c1cccnc1	B1-B9-B11-B3	1343.91
773	12180	CN1CNCNC1Oc1cccnc1	B3-B9-B11-B1	1309.89
774	12195	COC1NCN(CN1)c1ccccn1	B3-B9-B11-B1	1318.94
775	12198	COC1NCNC(N1)c1ccccn1	B3-B9-B11-B1	1306.61
776	12223	COc1ccncc1C1NCNCN1	B1-B3-B11-B9	1347.89
777	12268	Cc1ccc(nc1C1NCNCN1)O	B1-B11-B3-B9	1346.13
778	12281	Cc1ccnc(c1)N1CNCNC1O	B9-B11-B1-B3	1327.82
779	12292	Cc1cnc(c(c1)O)C1NCNCN1	B1-B11-B3-B9	1347.87
780	12294	Cc1cnc(c(n1)O)c1nncs1	B1-B12-B3-B8	1489.3
781	12303	Cc1cnc(cn1)c1nnc(s1)O	B1-B12-B8-B3	1482.1
782	12324	Cc1csc(c1)c1scc(c1)C	B7-B7-B1-B1	1247.3
783	12337	Cc1nc(cnc1S)C1CCCC1	B1-B12-B10-B2	1183.74
784	12346	Cc1nccc(c1)C1(O)NCNCN1	B9-B11-B1-B3	1333.77
785	12356	Cc1nnc(s1)c1nccnc1O	B1-B8-B12-B3	1483.47
786	12364	Cc1scc(c1)c1ccc(s1)C	B7-B7-B1-B1	1246.11
787	12369	Cc1scc(c1)c1sccc1C	B7-B7-B1-B1	1273.78
788	12375	Cc1sccc1Cc1ccsc1	B1-B7-B7-B1	1241.18
789	12386	N1CNCN(C1)OCc1ccncc1	B1-B3-B11-B9	1288.5
790	12389	OC(c1cccnc1)C1NCNCN1	B1-B3-B11-B9	1349.85
791	12403	OC1(NCNCN1)c1nccc(c1)C	B9-B11-B1-B3	1327.94
792	12409	OC1CCC(C1)Sc1ccccc1	B2-B10-B3-B5	1170.14
793	12494	OCc1cccnc1C1NCNCN1	B1-B3-B11-B9	1360.1
794	12502	OCc1cncc(c1)C1NCNCN1	B1-B3-B11-B9	1356.86
795	12503	OCc1cncc(c1)N1CNCNC1	B1-B3-B11-B9	1361.72
796	12508	OCc1nccc(c1)C1NCNCN1	B1-B3-B11-B9	1361.47
797	12519	ON1CN(CNC1C)c1cccnc1	B1-B9-B11-B3	1312.27
798	12523	ON1CNC(N(C1)C)c1ccncc1	B1-B9-B11-B3	1325.31
799	12530	ON1CNC(NC1)Cc1cccnc1	B1-B9-B11-B3	1328.94
800	12543	ON1CNC(NC1C)c1cccnc1	B1-B9-B11-B3	1312.72
801	12552	ON1CNCN(C1)c1ccnc(c1)C	B9-B11-B1-B3	1314.35
802	12553	ON1CNCN(C1)c1ccncc1C	B9-B11-B1-B3	1312.14
803	12560	ON1CNCNC1(C)c1ccccn1	B1-B9-B11-B3	1310.24
804	12566	ON1CNCNC1c1ccc(cn1)C	B9-B11-B1-B3	1313.95
805	12577	OOc1ccc(cc1)c1nsnc1	B3-B5-B3-B13	1485.38
806	12652	OSc1cnc(cn1)c1ccco1	B2-B3-B12-B15	1476.58
807	12662	Oc1c(C)ccnc1C1NCNCN1	B1-B11-B3-B9	1349.25
808	12667	Oc1c(ccnc1C)N1CNCNC1	B1-B11-B3-B9	1335.85
809	12686	Oc1ccc(c(c1)O)c1nsnc1	B3-B5-B3-B13	1539.79
810	12693	Oc1ccc(c(n1)c1cncs1)O	B3-B11-B14-B3	1528.19
811	12698	Oc1ccc(cc1)SC1CCCC1	B3-B5-B2-B10	1163.64
812	12715	Oc1ccc(cn1)c1scc(n1)O	B3-B11-B14-B3	1520.42
813	12763	Oc1ccccc1SC1CCCC1	B3-B5-B2-B10	1165.27
814	12790	Oc1ccnc(c1c1nccs1)O	B3-B11-B14-B3	1509.77
815	12791	Oc1ccnc(c1c1ncsc1)O	B3-B11-B14-B3	1518.84
816	12816	Oc1cnc(c(n1)c1ccco1)S	B3-B12-B15-B2	1510.96
817	12825	Oc1cnc(cc1O)c1cscn1	B3-B11-B14-B3	1531.28
818	12834	Oc1cnc(cn1)c1ccoc1S	B3-B12-B15-B2	1505.17
819	12838	Oc1cnc(cn1)c1nsnc1C	B1-B13-B12-B3	1508.67
820	12839	Oc1cnc(cn1)c1occc1S	B3-B12-B15-B2	1502.26
821	12847	Oc1cncc(c1)C1(C)NCNCN1	B1-B9-B11-B3	1354.43
822	12905	Oc1csc(n1)c1cccnc1O	B3-B14-B11-B3	1519.57
823	12909	Oc1cscc1Oc1cnccn1	B3-B7-B3-B12	1470.15
824	12919	Oc1ncc(c(c1)O)c1cncs1	B3-B11-B14-B3	1525.47
825	12929	Oc1ncc(cc1O)c1cncs1	B3-B11-B14-B3	1544.17
826	13013	Oc1scc(n1)Oc1ccccn1	B3-B14-B11-B3	1456.97
827	13023	Oc1scnc1Oc1cccnc1	B3-B14-B11-B3	1474.13
828	13039	SC1CCC(C1)Oc1ccccc1	B3-B5-B10-B2	1166.73
829	13046	SC1CCCC1(C)c1cnccn1	B1-B10-B12-B2	1208.51
830	13047	SC1CCCC1(O)c1ccccc1	B3-B10-B5-B2	1205.35
831	13055	SC1CCCC1c1nccnc1C	B1-B12-B10-B2	1201.61
832	13078	SOc1occ(c1)c1cnccn1	B3-B15-B12-B2	1487.78
833	13081	Sc1cc(c(o1)c1cnccn1)O	B3-B15-B12-B2	1500.87
834	13093	Sc1ccc(nc1)c1cscn1	B2-B11-B14	1454.48
835	13104	Sc1cccc(n1)c1nccs1	B2-B11-B14	1446.39
836	13109	Sc1cccnc1c1cncs1	B2-B11-B14	1460.52
837	13111	Sc1cccnc1c1nccs1	B2-B11-B14	1449.5
838	13119	Sc1ccsc1c1cnccn1	B2-B7-B12	1447.35
839	13121	Sc1cnc(c(n1)O)c1ccco1	B3-B12-B15-B2	1507.63
840	13124	Sc1cnc(c(n1)c1cocc1)O	B3-B12-B15-B2	1509.37
841	13135	Sc1cnc(s1)c1cccnc1	B2-B14-B11	1446.63
842	13144	Sc1cncc(n1)c1cccs1	B2-B12-B7	1444.74
843	13145	Sc1cncc(n1)c1ccoc1O	B3-B15-B12-B2	1511.19
844	13186	Sc1nccnc1c1occc1O	B3-B15-B12-B2	1502.91
845	13189	Sc1ncsc1c1ccncc1	B2-B14-B11	1457.72
846	13204	Sc1scnc1c1ccncc1	B2-B14-B11	1451.7
847	13244	n1ccc(cc1)Sc1nccs1	B2-B14-B11	1411.57
848	13261	CC1(NCNCN1)c1ncc(nc1)O	B1-B9-B12-B3	1402.86
849	13268	CC1NC(O)NC(N1)c1nccnc1	B1-B9-B12-B3	1378.75
850	13284	CC1NCNCN1c1cncc(n1)O	B1-B9-B12-B3	1392.4
851	13290	CCc1ccsc1c1cscn1	B7-B14-B1-B1	1327.44
852	13352	Cc1cc(c(s1)c1cncs1)C	B7-B14-B1-B1	1336.88
853	13381	Cc1csc(c1)c1scnc1C	B7-B14-B1-B1	1333.88
854	13395	Cc1cscc1c1scnc1C	B7-B14-B1-B1	1358.23
855	13434	Cc1scc(c1C)c1cncs1	B7-B14-B1-B1	1350.63
856	13443	Cc1scc(n1)c1ccsc1C	B7-B14-B1-B1	1327.84
857	13451	Cc1scnc1Cc1cscc1	B1-B14-B7-B1	1293.77
858	13456	N1CNC(NC1)OOc1ccccc1	B3-B5-B3-B9	1343.32
859	13469	OC1(CCCC1)c1nccc(c1)S	B2-B11-B10-B3	1245.22
860	13482	OC1(S)CCCC1c1ccccn1	B2-B10-B3-B11	1255.21
861	13489	OC1CCC(C1)(S)c1ccccn1	B2-B10-B3-B11	1262.41
862	13492	OC1CCC(C1)Sc1ccccn1	B2-B10-B3-B11	1222.26
863	13494	OC1CCC(C1)Sc1ccncc1	B2-B10-B3-B11	1226.65
864	13499	OC1CCC(C1)c1ccnc(c1)S	B2-B11-B10-B3	1254.17
865	13535	OC1NCN(CN1)c1ccccc1O	B3-B9-B5-B3	1395.35
866	13541	OC1NCNC(N1)(O)c1ccccc1	B3-B9-B3-B5	1396.17
867	13551	OC1NCNC(N1c1ccccc1)O	B3-B9-B3-B5	1385.41
868	13555	OC1NCNCN1c1cnc(cn1)C	B1-B12-B9-B3	1378.58
869	13556	OC1NCNCN1c1cncc(n1)C	B1-B12-B9-B3	1383.5
870	13562	OCN1CNC(NC1)c1nccnc1	B1-B9-B12-B3	1408.02
871	13563	OCN1CNCN(C1)c1cnccn1	B1-B9-B12-B3	1401.88
872	13573	ON1CN(CNC1O)c1ccccc1	B3-B9-B3-B5	1382.13
873	13576	ON1CNC(NC1)(C)c1nccnc1	B1-B9-B12-B3	1366.03
874	13596	ON1CNCN(C1c1ccccc1)O	B3-B9-B3-B5	1368.3
875	13609	OOC1NCNC(N1)c1ccccc1	B3-B9-B3-B5	1354.03
876	13654	OOc1nnc(s1)c1ccccn1	B3-B8-B3-B11	1513.62
877	13664	OSC1CCC(C1)c1ccccn1	B2-B3-B10-B11	1215.83
878	13666	OSC1CCC(C1)c1ccncc1	B2-B3-B10-B11	1225.75
879	13678	OSc1nccc(c1)C1CCCC1	B2-B3-B11-B10	1225.95
880	13681	Oc1c(S)ccnc1C1CCCC1	B2-B11-B3-B10	1251.64
881	13683	Oc1c(ccnc1S)C1CCCC1	B2-B11-B3-B10	1252.98
882	13686	Oc1cc(O)nc(c1)c1scnn1	B3-B11-B8-B3	1584.23
883	13714	Oc1ccc(nc1)SC1CCCC1	B2-B11-B3-B10	1210.98
884	13730	Oc1cccc(n1)c1nsnc1O	B3-B11-B13-B3	1604.39
885	13758	Oc1cnc(c(n1)O)c1cncs1	B3-B12-B14-B3	1599.08
886	13767	Oc1cnc(cn1)Oc1cncs1	B3-B12-B14-B3	1542.08
887	13816	Oc1ncc(cc1O)c1nsnc1	B3-B11-B13-B3	1622.56
888	13880	SC1CC(CC1O)c1ccccn1	B2-B10-B3-B11	1247.84
889	13883	SC1CC(CC1c1ccncc1)O	B2-B10-B3-B11	1263.32
890	13902	SC1CCCC1(O)c1ccccn1	B2-B10-B3-B11	1251.92
891	13917	SC1CCCC1c1ncccc1O	B2-B10-B11-B3	1252.99
892	13931	SOC1CCCC1c1cccnc1	B2-B3-B10-B11	1231.62
893	13945	Sc1c(cncc1O)C1CCCC1	B2-B11-B3-B10	1264.42
894	13966	Sc1ccccc1N1CNCNC1	B2-B5-B9	1350.25
895	13973	Sc1ccnc(c1)c1nsnc1	B2-B11-B13	1539.33
896	14000	Sc1ncc(s1)c1nccnc1	B2-B14-B12	1524.81
897	14010	Sc1nccnc1c1ncsc1	B2-B12-B14	1522.82
898	14011	Sc1ncsc1c1cnccn1	B2-B14-B12	1532.8
899	14013	Sc1nnc(s1)c1cccnc1	B2-B8-B11	1509.63
900	14022	c1ccc(cn1)Sc1nncs1	B2-B11-B8	1471.77
901	14044	C1CCC(C1)OSc1nccnc1	B2-B3-B12-B10	1241.25
902	14056	CC(c1nccs1)c1ncsc1	B1-B14-B14-B1	1356.12
903	14103	COc1cscc1c1cccs1	B3-B7-B1-B7	1387.23
904	14105	COc1scc(c1)c1cccs1	B3-B7-B1-B7	1368.04
905	14124	CSc1cscc1c1cocc1	B2-B7-B1-B15	1399.07
906	14125	CSc1occ(c1)c1cccs1	B2-B15-B1-B7	1353.53
907	14143	Cc1cc(sc1)Cc1nncs1	B1-B8-B7-B1	1334.09
908	14163	Cc1ccc(s1)c1ccsc1O	B7-B7-B3-B1	1390.84
909	14172	Cc1ccoc1Sc1cscc1	B1-B15-B2-B7	1337.35
910	14174	Cc1ccoc1c1cscc1S	B1-B15-B7-B2	1409.02
911	14180	Cc1ccsc1Sc1ccco1	B2-B7-B1-B15	1338.96
912	14184	Cc1ccsc1c1cocc1S	B1-B7-B15-B2	1414.13
913	14203	Cc1coc(c1c1cscc1)S	B1-B15-B7-B2	1420.61
914	14226	Cc1csc(c1O)c1cccs1	B3-B7-B1-B7	1397.84
915	14230	Cc1csc(c1c1ccco1)S	B1-B7-B15-B2	1408.97
916	14237	Cc1csc(n1)c1cnc(s1)C	B1-B14-B14-B1	1343.04
917	14240	Cc1csc(n1)c1scc(n1)C	B1-B14-B14-B1	1352.73
918	14243	Cc1cscc1Cc1nsnc1	B1-B13-B7-B1	1372.86
919	14244	Cc1cscc1Oc1cccs1	B3-B7-B1-B7	1324.84
920	14248	Cc1cscc1c1cscc1O	B7-B7-B3-B1	1435.84
921	14259	Cc1ncc(s1)c1cnc(s1)C	B1-B14-B14-B1	1355.01
922	14284	Cc1occ(c1)c1sccc1S	B1-B15-B7-B2	1386.9
923	14303	Cc1sc(nc1C)c1ncsc1	B1-B14-B14-B1	1375.94
924	14305	Cc1scc(c1)Cc1nncs1	B1-B8-B7-B1	1339.79
925	14312	Cc1scc(c1)c1ccsc1O	B7-B7-B3-B1	1395.34
926	14351	Cc1scnc1c1ncsc1C	B1-B14-B14-B1	1406.57
927	14365	OC1(CCCC1)c1ncc(nc1)S	B3-B10-B12-B2	1298.42
928	14387	OC1CC(CC1c1cnccn1)S	B3-B10-B12-B2	1312.63
929	14415	OC1NCN(CN1)c1cccc(n1)O	B3-B9-B11-B3	1469.58
930	14422	OC1NCN(CN1)c1ncccc1O	B3-B9-B11-B3	1462.62
931	14438	OC1NCNC(N1)c1nccc(c1)O	B3-B9-B11-B3	1468.65
932	14478	ON1CNC(N(C1)c1cccnc1)O	B3-B9-B3-B11	1445.2
933	14494	ON1CNC(NC1)c1ncccc1O	B3-B9-B11-B3	1457.08
934	14502	ON1CNCN(C1)c1ccc(nc1)O	B3-B9-B11-B3	1447.79
935	14544	OON1CNC(NC1)c1ccccn1	B3-B9-B3-B11	1400.94
936	14554	OOc1ccc(cn1)N1CNCNC1	B9-B11-B3-B3	1426.75
937	14557	OOc1cccc(n1)C1NCNCN1	B9-B11-B3-B3	1429.26
938	14559	OOc1cccnc1C1NCNCN1	B9-B11-B3-B3	1424.64
939	14577	OOc1nccnc1c1nncs1	B3-B12-B8-B3	1598.96
940	14587	Oc1c(O)ccnc1C1NCNCN1	B9-B11-B3-B3	1487.96
941	14594	Oc1cc(O)nc(c1)N1CNCNC1	B9-B11-B3-B3	1473.11
942	14597	Oc1cc(c(s1)c1cccs1)C	B3-B7-B1-B7	1403.34
943	14599	Oc1cc(cc(n1)O)C1NCNCN1	B9-B11-B3-B3	1464.77
944	14603	Oc1cc(sc1C)c1cccs1	B3-B7-B1-B7	1379.87
945	14610	Oc1ccc(nc1)OC1NCNCN1	B3-B9-B11-B3	1442.39
946	14623	Oc1cccnc1OC1NCNCN1	B3-B9-B11-B3	1440.79
947	14630	Oc1ccncc1OC1NCNCN1	B3-B9-B11-B3	1443.97
948	14649	Oc1cncc(c1)ON1CNCNC1	B3-B9-B11-B3	1421.35
949	14656	Oc1cncc(n1)c1nsnc1O	B3-B12-B13-B3	1689.53
950	14678	Oc1ncc(cc1N1CNCNC1)O	B9-B11-B3-B3	1473.25
951	14704	Oc1scc(c1)c1cscc1C	B7-B7-B3-B1	1420.89
952	14705	Oc1scc(c1)c1scc(c1)C	B7-B7-B3-B1	1385.96
953	14708	Oc1scc(c1C)c1cscc1	B3-B7-B1-B7	1425.6
954	14715	SC(c1cccs1)c1ccoc1	B1-B15-B7-B2	1349.46
955	14726	SC1CCC(C1)Oc1cnccn1	B3-B12-B10-B2	1285.6
956	14732	SC1CCCC1c1cnc(cn1)O	B3-B12-B10-B2	1302.97
957	14765	SCc1scc(c1)c1cocc1	B1-B7-B15-B2	1383.38
958	14783	Sc1cc(c(o1)c1cccs1)C	B1-B15-B7-B2	1374.35
959	14785	Sc1cc(c(s1)c1ccco1)C	B1-B7-B15-B2	1370.16
960	14816	Sc1ccoc1Cc1cscc1	B1-B15-B7-B2	1345.83
961	14861	Sc1nccc(c1)C1NCNCN1	B2-B11-B9	1429.54
962	14869	Sc1nsnc1c1cnccn1	B2-B13-B12	1611.43
963	14871	Sc1oc(c(c1)c1cscc1)C	B1-B15-B7-B2	1395.36
964	14877	Sc1occ(c1)c1cscc1C	B1-B7-B15-B2	1400.77
965	14889	Sc1scc(c1)Cc1cocc1	B1-B15-B7-B2	1338.38
966	14912	o1ccc(c1)CSc1ccsc1	B2-B7-B1-B15	1343.52
967	14945	CCc1cccc(c1)c1cscc1	B5-B7-B1-B1	1142.34
968	14946	CCc1cccc2c1c(S)ccc2	B2-B16-B1-B1	1204.19
969	14975	CSc1cccc2c1cccc2C	B2-B16-B1-B1	1180.6
970	14988	Cc1cc2c(cc1C)cccc2S	B2-B16-B1-B1	1196.84
971	14991	Cc1ccc(c(c1)C)c1cscc1	B5-B7-B1-B1	1133.86
972	14996	Cc1ccc(cc1)Cc1cscc1	B1-B7-B5-B1	1115.6
973	15012	Cc1ccc2c(c1)cc(c(c2)C)S	B2-B16-B1-B1	1179.29
974	15026	Cc1cccc(c1)c1cscc1C	B5-B7-B1-B1	1121.3
975	15047	Cc1cncc(n1)c1nccnc1O	B3-B12-B12-B1	1351.71
976	15049	Cc1csc(c1)c1ccccc1C	B5-B7-B1-B1	1125.68
977	15076	OCc1cncc(n1)c1cnccn1	B1-B12-B3-B12	1362.91
978	15089	OOc1ccc(nc1)c1cccnc1	B3-B11-B11-B3	1329.4
979	15095	OOc1ccccc1c1cnccn1	B3-B5-B3-B12	1323.76
980	15108	OOc1cncc(n1)c1ccccc1	B3-B12-B5-B3	1319.78
981	15114	OOc1nccc(c1)c1cccnc1	B3-B11-B11-B3	1334.98
982	15118	OOc1ncccc1c1ccncc1	B3-B11-B11-B3	1326.79
983	15142	Oc1ccc(cn1)Oc1cccnc1	B3-B11-B11-B3	1330.72
984	15158	Oc1ccc(nc1)c1cccc(n1)O	B3-B11-B11-B3	1364.14
985	15183	Oc1ccccc1c1nccnc1O	B3-B5-B12-B3	1363.43
986	15274	Oc1nccc(c1)c1cncc(c1)O	B3-B11-B11-B3	1391.01
987	15308	Sc1ccc(c2c1cccc2C)C	B2-B16-B1-B1	1230.4
988	15321	Sc1ccc2c(c1)ccc(c2C)C	B2-B16-B1-B1	1197.78
989	15332	Sc1ccnc(c1)c1ccccn1	B2-B11-B11	1303.16
990	15380	CCc1ccc(cc1)c1cscn1	B1-B1-B5-B14	1189.84
991	15386	CCc1ccc(s1)c1ccccn1	B1-B7-B11-B1	1173.92
992	15451	Cc1ccc(cc1)Cc1ncsc1	B1-B5-B1-B14	1168.24
993	15454	Cc1ccc(cc1)c1csc(n1)C	B1-B5-B14-B1	1179.26
994	15458	Cc1ccc(cc1)c1scnc1C	B1-B5-B14-B1	1176.87
995	15470	Cc1ccc(nc1)Cc1cccs1	B1-B7-B11-B1	1157.93
996	15484	Cc1ccc(s1)c1ccncc1C	B1-B7-B11-B1	1184.14
997	15507	Cc1cccc(n1)c1sccc1C	B1-B11-B7-B1	1171.16
998	15510	Cc1ccccc1Cc1nccs1	B1-B5-B1-B14	1179.72
999	15531	Cc1ccncc1c1ccsc1C	B1-B11-B7-B1	1170.69
1000	15552	Cc1cncc(c1C)c1cccs1	B1-B11-B7-B1	1194.54
1001	15554	Cc1cncc(c1c1cccs1)C	B1-B11-B7-B1	1179.28
1002	15573	Cc1csc(n1)c1ccccc1C	B1-B5-B14-B1	1172.72
1003	15576	Cc1cscc1Cc1ccncc1	B1-B7-B11-B1	1177.43
1004	15584	Cc1ncc(cc1C)c1cccs1	B1-B11-B7-B1	1200.88
1005	15589	Cc1nccc(c1)Cc1cscc1	B1-B7-B11-B1	1170.93
1006	15590	Cc1nccc(c1)c1ccc(s1)C	B1-B7-B11-B1	1185.89
1007	15625	Cc1scc(c1c1ccccn1)C	B1-B7-B11-B1	1167.35
1008	15628	Cc1scc(n1)Cc1ccccc1	B1-B14-B5-B1	1163.74
1009	15670	Oc1cccnc1Oc1nccnc1	B3-B12-B11-B3	1393.63
1010	15673	Oc1ccnc(c1)c1cncc(n1)O	B3-B11-B12-B3	1433.19
1011	15691	Oc1cnc(cn1)c1ccncc1O	B3-B12-B11-B3	1442.88
1012	15700	Oc1cncc(n1)Oc1ccncc1	B3-B12-B11-B3	1394.4
1013	15734	Sc1cnc(cn1)c1cccnc1	B2-B12-B11	1379.35
1014	15737	Sc1cncc(n1)c1ccccn1	B2-B12-B11	1366.75
1015	15740	Sc1cnccc1c1cnccn1	B2-B11-B12	1381.36
1016	15748	c1ccc(cc1)CCc1nccs1	B1-B1-B5-B14	1165.37
1017	15763	CC(c1cncs1)c1cccnc1	B1-B14-B11-B1	1234.04
1018	15765	CC(c1cscc1)c1cnccn1	B1-B12-B1-B7	1233.36
1019	15786	CCc1cccc(n1)c1cscn1	B1-B11-B14-B1	1233.79
1020	15794	CCc1ccnc(c1)c1cscn1	B1-B11-B14-B1	1247.65
1021	15824	CCc1ncccc1c1cncs1	B1-B11-B14-B1	1243.44
1022	15850	COc1ccc(cc1)c1cscc1	B3-B5-B1-B7	1250.71
1023	15881	CSc1ccc2c(c1)cc(cc2)O	B2-B16-B1-B3	1268.96
1024	15922	Cc1ccc(c(c1)C)c1nsnc1	B1-B5-B13-B1	1252.87
1025	15931	Cc1ccc(c(c1)c1nncs1)C	B1-B5-B8-B1	1227.05
1026	15948	Cc1ccc(cc1)c1ccc(s1)O	B5-B7-B1-B3	1245.58
1027	15953	Cc1ccc(cc1)c1csc(c1)O	B5-B7-B1-B3	1249.76
1028	15955	Cc1ccc(cc1)c1nnc(s1)C	B1-B5-B8-B1	1229.97
1029	15970	Cc1ccc(cn1)c1cnc(s1)C	B1-B11-B14-B1	1240.85
1030	15974	Cc1ccc(cn1)c1scc(n1)C	B1-B11-B14-B1	1233.92
1031	15989	Cc1ccc(o1)c1ccccc1S	B5-B15-B2-B1	1221.99
1032	16007	Cc1ccc2c(c1O)cccc2S	B2-B16-B1-B3	1308.78
1033	16011	Cc1cccc(c1)Cc1nsnc1	B1-B13-B5-B1	1240.93
1034	16039	Cc1cccc(c1c1nsnc1)C	B1-B5-B13-B1	1247.13
1035	16046	Cc1cccc(n1)c1scc(n1)C	B1-B11-B14-B1	1224.35
1036	16052	Cc1ccccc1Sc1ccco1	B2-B5-B1-B15	1205
1037	16088	Cc1ccsc1Oc1ccccc1	B3-B7-B1-B5	1200.49
1038	16109	Cc1cnc(s1)c1cnccc1C	B1-B11-B14-B1	1231.28
1039	16118	Cc1cncc(c1)c1scc(n1)C	B1-B11-B14-B1	1242.15
1040	16124	Cc1cncc(c1c1nccs1)C	B1-B11-B14-B1	1238.97
1041	16153	Cc1csc(n1)c1cccnc1C	B1-B14-B11-B1	1228.07
1042	16154	Cc1csc(n1)c1ccncc1C	B1-B11-B14-B1	1237.62
1043	16206	Cc1nccnc1Cc1cscc1	B1-B12-B1-B7	1239.09
1044	16217	Cc1occ(c1)Sc1ccccc1	B1-B15-B2-B5	1203.53
1045	16222	Cc1sc(c(c1)c1ccccc1)O	B5-B7-B1-B3	1237.43
1046	16242	Cc1scc(n1)Cc1ccncc1	B1-B14-B11-B1	1226.81
1047	16246	Cc1scc(n1)c1cnccc1C	B1-B11-B14-B1	1234.95
1048	16276	OCc1cccc2c1ccc(c2)S	B2-B16-B1-B3	1309.55
1049	16284	OCc1sccc1c1ccccc1	B5-B7-B1-B3	1253.34
1050	16299	OSc1ccc2c(c1C)cccc2	B2-B16-B1-B3	1285.59
1051	16310	Oc1cc(c(s1)c1ccccc1)C	B5-B7-B1-B3	1237.59
1052	16311	Oc1cc(sc1C)c1ccccc1	B5-B7-B1-B3	1261.43
1053	16320	Oc1ccc(c2c1cccc2C)S	B2-B16-B1-B3	1332.27
1054	16324	Oc1ccc(cc1)c1ccc(s1)C	B5-B7-B1-B3	1246.36
1055	16380	Oc1nccnc1Oc1cnccn1	B3-B12-B12-B3	1461.55
1056	16394	SCc1cc(O)cc2c1cccc2	B1-B2-B16-B3	1310.03
1057	16397	SCc1ccc(cc1)c1ccco1	B1-B5-B2-B15	1246.95
1058	16429	SOc1ccc2c(c1C)cccc2	B2-B3-B16-B1	1281.55
1059	16468	Sc1ccc2c(c1)c(C)ccc2O	B2-B16-B1-B3	1308.25
1060	16532	n1ccnc(c1)OOc1nccnc1	B3-B12-B3-B12	1427.75
1061	16535	CC(c1ccccc1)C1NCNCN1	B1-B9-B5-B1	1169.21
1062	16568	CC1NCNCN1c1ccccc1C	B1-B9-B5-B1	1151.25
1063	16600	CCc1cncc(n1)c1cncs1	B1-B12-B14-B1	1294.6
1064	16615	CCc1ncsc1c1cnccn1	B1-B14-B12-B1	1293.68
1065	16618	CCc1nnc(s1)c1ccncc1	B1-B8-B11-B1	1289.54
1066	16640	CN1CNCNC1c1cccc(c1)C	B1-B9-B5-B1	1170.48
1067	16665	COc1ccncc1c1ccsc1	B3-B11-B7-B1	1313.63
1068	16674	COc1csc(c1)c1ccccn1	B3-B7-B11-B1	1299.58
1069	16685	COc1ncccc1c1cscc1	B3-B11-B7-B1	1299.04
1070	16731	CSc1occc1c1cccnc1	B2-B15-B11-B1	1289.18
1071	16735	Cc1cc(C)nc(c1)c1cnsn1	B1-B11-B13-B1	1310.07
1072	16736	Cc1cc(C)nc(c1)c1scnn1	B1-B11-B8-B1	1285.04
1073	16739	Cc1cc(O)cc(c1)c1scnc1	B3-B5-B14-B1	1324.35
1074	16747	Cc1cc(c(s1)c1ccccn1)O	B3-B7-B11-B1	1290.67
1075	16774	Cc1ccc(c(n1)c1ccoc1)S	B2-B11-B15-B1	1296.27
1076	16776	Cc1ccc(c(n1)c1nncs1)C	B1-B11-B8-B1	1283.44
1077	16788	Cc1ccc(cc1)c1scc(n1)O	B3-B14-B5-B1	1305.66
1078	16789	Cc1ccc(cc1)c1scnc1O	B3-B14-B5-B1	1305.4
1079	16830	Cc1ccc(nc1)c1nsnc1C	B1-B11-B13-B1	1299.77
1080	16851	Cc1ccc(s1)c1cccnc1O	B3-B11-B7-B1	1298.14
1081	16872	Cc1cccc(c1O)c1nccs1	B3-B5-B14-B1	1306.63
1082	16880	Cc1cccc(n1)Sc1ccco1	B2-B11-B15-B1	1261
1083	16881	Cc1cccc(n1)Sc1cocc1	B2-B11-B15-B1	1258.46
1084	16885	Cc1cccc(n1)c1ccsc1O	B3-B7-B11-B1	1298.11
1085	16888	Cc1cccc(n1)c1csc(c1)O	B3-B7-B11-B1	1308.28
1086	16894	Cc1ccccc1C1(C)NCNCN1	B1-B9-B5-B1	1179.51
1087	16954	Cc1ccncc1c1cscc1O	B3-B7-B11-B1	1304.14
1088	16957	Cc1ccncc1c1sccc1O	B3-B7-B11-B1	1302
1089	16958	Cc1ccoc1Sc1ccccn1	B2-B11-B15-B1	1258.86
1090	16967	Cc1cnc(c(c1)O)c1cscc1	B3-B11-B7-B1	1308.25
1091	16970	Cc1cnc(c(c1)c1ccco1)S	B2-B11-B15-B1	1298.75
1092	16975	Cc1cnc(c(c1)c1nsnc1)C	B1-B11-B13-B1	1303.91
1093	16987	Cc1cnc(cc1S)c1cocc1	B2-B11-B15-B1	1312.77
1094	16990	Cc1cnc(cn1)Cc1nccs1	B1-B12-B14-B1	1278.57
1095	16993	Cc1cnc(s1)c1ccccc1O	B3-B5-B14-B1	1295.56
1096	17017	Cc1cncc(c1S)c1ccco1	B2-B11-B15-B1	1311.56
1097	17070	Cc1csc(c1)c1ccncc1O	B3-B11-B7-B1	1308.7
1098	17089	Cc1nc(O)cc(c1)c1ccsc1	B3-B11-B7-B1	1322.33
1099	17090	Cc1nc(S)cc(c1)c1ccco1	B2-B11-B15-B1	1302.61
1100	17119	Cc1ncc(nc1C)c1cncs1	B1-B12-B14-B1	1306.56
1101	17137	Cc1nccc(c1)c1cscc1O	B3-B7-B11-B1	1313.56
1102	17140	Cc1nccc(c1)c1occ(c1)S	B2-B15-B11-B1	1297.42
1103	17146	Cc1nccc(c1O)c1cccs1	B3-B11-B7-B1	1312.22
1104	17161	Cc1ncccc1c1occc1S	B2-B15-B11-B1	1279.32
1105	17171	Cc1nnc(s1)Cc1cccnc1	B1-B8-B11-B1	1263.09
1106	17176	Cc1nnc(s1)c1ncccc1C	B1-B11-B8-B1	1277.95
1107	17204	Cc1sc(nc1C)c1nccnc1	B1-B14-B12-B1	1296.88
1108	17224	Cc1sccc1Oc1cccnc1	B3-B7-B11-B1	1261.37
1109	17229	OC(c1cccs1)c1ccccn1	B1-B3-B7-B11	1299.26
1110	17241	OCc1ccc(cn1)c1cccs1	B1-B3-B11-B7	1330.01
1111	17279	OCc1nccc(c1)c1cscc1	B1-B3-B11-B7	1333.48
1112	17288	OCc1sccc1c1cccnc1	B1-B3-B7-B11	1317.57
1113	17297	Oc1cc(sc1C)c1cccnc1	B3-B7-B11-B1	1316.61
1114	17318	Oc1ccc(cc1C)c1cncs1	B3-B5-B14-B1	1326.96
1115	17336	Oc1ccc(nc1C)c1cccs1	B3-B11-B7-B1	1304.98
1116	17359	Oc1cccc(n1)c1ccc(s1)C	B3-B11-B7-B1	1295.43
1117	17365	Oc1ccccc1Cc1cscn1	B3-B5-B1-B14	1291.15
1118	17422	Oc1csc(c1)c1cnccc1C	B3-B7-B11-B1	1306.87
1119	17423	Oc1csc(c1)c1ncccc1C	B3-B7-B11-B1	1305.67
1120	17456	Oc1ncccc1c1ccsc1C	B3-B11-B7-B1	1291.95
1121	17457	Oc1ncccc1c1cscc1C	B3-B11-B7-B1	1295.44
1122	17466	Oc1scc(c1)Cc1ccncc1	B3-B7-B1-B11	1291.36
1123	17472	Oc1scc(c1)c1nccc(c1)C	B3-B7-B11-B1	1312.28
1124	17476	Oc1scc(c1C)c1ccncc1	B3-B7-B11-B1	1304.89
1125	17484	SC(c1ccco1)c1cccnc1	B1-B15-B2-B11	1292.11
1126	17523	SCc1occ(c1)c1ccncc1	B1-B15-B2-B11	1313.75
1127	17527	Sc1cc(C)nc(c1)c1ccco1	B2-B11-B15-B1	1295.48
1128	17548	Sc1ccc(nc1)c1ccc(o1)C	B2-B11-B15-B1	1286.41
1129	17570	Sc1cccnc1Cc1ccco1	B1-B15-B11-B2	1292.81
1130	17582	Sc1ccnc(c1C)c1ccco1	B2-B11-B15-B1	1308.99
1131	17590	Sc1ccncc1c1occc1C	B2-B11-B15-B1	1283.12
1132	17593	Sc1ccoc1Cc1ccncc1	B1-B15-B2-B11	1283.16
1133	17623	Sc1coc(c1C)c1ccccn1	B2-B15-B11-B1	1290.74
1134	17668	Sc1occc1Cc1ccccn1	B1-B15-B2-B11	1272.32
1135	17681	c1ccc(cn1)CSc1ccco1	B2-B15-B1-B11	1271.02
1136	17684	c1ccc(cn1)OCc1cscc1	B1-B3-B7-B11	1284.41
1137	17710	C1CSC(CS1)c1ccccn1	B6-B11	1329.51
1138	17714	C1NCN(CN1)OOc1cnccn1	B3-B9-B3-B12	1438.52
1139	17721	CC(c1nsnc1)c1nccs1	B1-B13-B1-B14	1433.76
1140	17728	CC1(C)NCNC(N1)c1cscc1	B1-B9-B7-B1	1263.63
1141	17730	CC1(C)NCNCN1c1cscc1	B1-B9-B7-B1	1275.01
1142	17736	CC1(NCNCN1)c1scc(c1)C	B1-B9-B7-B1	1279.61
1143	17744	CC1NCN(CN1)Cc1cscc1	B1-B9-B7-B1	1281.79
1144	17763	CC1NCNCN1Cc1cccs1	B1-B9-B7-B1	1273.34
1145	17765	CC1NCNCN1c1ccc(s1)C	B1-B9-B7-B1	1262.82
1146	17797	CCc1ncc(s1)c1nsnc1	B1-B14-B13-B1	1441.84
1147	17813	CCc1scnc1c1nsnc1	B1-B14-B13-B1	1474.26
1148	17819	CN1CN(CNC1C)c1cscc1	B1-B9-B7-B1	1274.84
1149	17842	CN1CNCN(C1)c1scc(c1)C	B1-B9-B7-B1	1273.07
1150	17843	CN1CNCN(C1)c1sccc1C	B1-B9-B7-B1	1281.94
1151	17857	CN1CNCNC1c1sccc1C	B1-B9-B7-B1	1291.68
1152	17916	CSc1scnc1c1ccco1	B2-B14-B1-B15	1437.94
1153	17929	Cc1cc(oc1S)c1cscn1	B1-B15-B14-B2	1420.81
1154	17931	Cc1cc(sc1C1NCNCN1)C	B1-B7-B9-B1	1275.24
1155	17935	Cc1cc(sc1O)c1nccs1	B3-B7-B1-B14	1446.62
1156	17944	Cc1ccc(s1)CC1NCNCN1	B1-B9-B7-B1	1270.13
1157	17996	Cc1coc(c1c1nccs1)S	B1-B15-B14-B2	1464.18
1158	18001	Cc1cocc1c1scnc1S	B1-B15-B14-B2	1489.92
1159	18033	Cc1csc(n1)c1cscc1O	B7-B14-B3-B1	1452.78
1160	18049	Cc1nc(c(s1)c1nncs1)C	B1-B14-B8-B1	1439.68
1161	18055	Cc1nc(sc1S)c1cocc1	B2-B14-B1-B15	1425.83
1162	18077	Cc1ncsc1c1ccoc1S	B1-B14-B15-B2	1489.7
1163	18082	Cc1nnc(s1)Cc1nccs1	B1-B8-B1-B14	1386.33
1164	18087	Cc1nsnc1Cc1nccs1	B1-B13-B1-B14	1432.82
1165	18095	Cc1occ(c1)c1csc(n1)S	B1-B15-B14-B2	1422.44
1166	18117	Cc1sc(cc1C1NCNCN1)C	B1-B7-B9-B1	1270.51
1167	18128	Cc1scc(c1)c1ncsc1O	B7-B14-B3-B1	1460.26
1168	18154	Cc1scnc1Cc1nncs1	B1-B8-B14-B1	1409.92
1169	18198	OCc1ccc(s1)c1cscn1	B1-B3-B7-B14	1455.73
1170	18203	OCc1cnc(s1)c1cccs1	B7-B14-B1-B3	1446.45
1171	18216	OCc1ncsc1c1cscc1	B7-B14-B1-B3	1498.34
1172	18229	ON1CN(CNC1O)c1cnccn1	B3-B9-B3-B12	1505.62
1173	18248	OOC1(NCNCN1)c1nccnc1	B3-B9-B3-B12	1488.67
1174	18265	Oc1cc(sc1C)c1cscn1	B3-B7-B1-B14	1447.99
1175	18305	Oc1csc(n1)c1ccc(s1)C	B7-B14-B3-B1	1429.27
1176	18318	Oc1nc(c(s1)c1cscc1)C	B7-B14-B3-B1	1479.19
1177	18326	Oc1ncc(nc1N1CNCNC1)O	B3-B12-B9-B3	1534.42
1178	18339	Oc1sc(c(c1)c1cscn1)C	B3-B7-B1-B14	1478.71
1179	18354	Oc1scc(n1)c1ccsc1C	B7-B14-B3-B1	1477.32
1180	18358	Oc1sccc1Cc1cscn1	B3-B7-B1-B14	1429.94
1181	18370	SC1(NCNCN1)c1nccnc1	B2-B9-B12	1493.91
1182	18373	SC1NCNCN1c1cnccn1	B2-B9-B12	1481.55
1183	18380	SCc1cnc(s1)c1ccco1	B1-B14-B2-B15	1426.65
1184	18400	SCc1scc(n1)c1ccco1	B1-B14-B2-B15	1431.81
1185	18401	SCc1scc(n1)c1cocc1	B1-B14-B2-B15	1437.4
1186	18427	Sc1cnc(s1)Cc1cocc1	B2-B14-B1-B15	1407.93
1187	18450	Sc1cocc1Cc1nccs1	B1-B15-B14-B2	1407.55
1188	18456	Sc1csc(n1)c1ccoc1C	B1-B15-B14-B2	1448.16
1189	18476	Sc1oc(c(c1)c1cncs1)C	B1-B15-B14-B2	1454.16
1190	18482	Sc1occ(c1)c1cnc(s1)C	B1-B14-B15-B2	1418.69
1191	18494	Sc1sc(c(n1)c1ccco1)C	B2-B14-B1-B15	1437.4
1192	18540	CC(c1nccs1)C1NCNCN1	B1-B9-B14-B1	1345.67
1193	18545	CC(c1scnc1)C1NCNCN1	B1-B9-B14-B1	1346.91
1194	18547	CC(c1scnn1)c1scnn1	B1-B8-B1-B8	1465.88
1195	18566	CC1(NCNCN1)c1cnc(s1)C	B1-B9-B14-B1	1337.5
1196	18569	CC1(NCNCN1)c1ncsc1C	B1-B9-B14-B1	1352.88
1197	18583	CC1CCC(C1)c1ccsc1S	B2-B7-B10-B1	1194.55
1198	18602	CC1N(CNCN1C)c1cncs1	B1-B9-B14-B1	1330.82
1199	18617	CC1NCN(CN1)c1ncsc1C	B1-B9-B14-B1	1333.82
1200	18622	CC1NCNC(N1)(C)c1cncs1	B1-B9-B14-B1	1339.85
1201	18634	CC1NCNC(N1c1nccs1)C	B1-B9-B14-B1	1325.78
1202	18644	CC1NCNCN1c1scc(n1)C	B1-B9-B14-B1	1318.78
1203	18649	CCC1NC(NCN1)c1cncs1	B1-B9-B14-B1	1330.1
1204	18656	CCC1NCNCN1c1cscn1	B1-B9-B14-B1	1327.14
1205	18690	CN1CN(CNC1C)c1cscn1	B1-B9-B14-B1	1326.59
1206	18755	COc1ncsc1c1cncs1	B3-B14-B14-B1	1517.23
1207	18785	CSc1coc(c1)c1nsnc1	B2-B15-B1-B13	1511.6
1208	18805	Cc1cc(c(s1)c1nsnc1)O	B3-B7-B1-B13	1537.33
1209	18828	Cc1ccsc1Oc1scnn1	B3-B7-B1-B8	1461.42
1210	18831	Cc1cnc(s1)CC1NCNCN1	B1-B9-B14-B1	1332.23
1211	18849	Cc1cocc1c1nsnc1S	B2-B13-B15-B1	1562.53
1212	18865	Cc1csc(n1)c1ncc(s1)O	B1-B14-B14-B3	1494.33
1213	18876	Cc1nc(cs1)Oc1cscn1	B3-B14-B14-B1	1465.66
1214	18888	Cc1ncc(s1)c1csc(n1)O	B1-B14-B14-B3	1509.12
1215	18889	Cc1ncc(s1)c1ncc(s1)O	B1-B14-B14-B3	1507.06
1216	18901	Cc1nnc(s1)Oc1cccs1	B3-B8-B1-B7	1443.16
1217	18953	Cc1scc(n1)Oc1nccs1	B3-B14-B14-B1	1456.78
1218	18954	Cc1scc(n1)c1csc(n1)O	B1-B14-B14-B3	1498.9
1219	18970	N1CNCN(C1)CCc1ncsc1	B1-B9-B1-B14	1343.82
1220	19006	OCc1scc(c1)c1nncs1	B1-B3-B7-B8	1517.07
1221	19026	OOc1sccc1c1cccs1	B3-B7-B3-B7	1495.75
1222	19033	OSc1ccoc1c1cscc1	B2-B3-B15-B7	1523
1223	19042	OSc1cscc1c1ccco1	B2-B3-B7-B15	1506.86
1224	19050	OSc1sccc1c1ccco1	B2-B3-B7-B15	1508.98
1225	19064	Oc1cc(sc1C)c1nsnc1	B3-B7-B1-B13	1536.83
1226	19075	Oc1ccc(s1)Cc1nsnc1	B3-B7-B1-B13	1505.63
1227	19077	Oc1ccc(s1)Oc1cscc1	B3-B7-B3-B7	1463.13
1228	19095	Oc1ccsc1Cc1scnn1	B3-B7-B1-B8	1495.52
1229	19109	Oc1cnc(s1)c1ncsc1C	B1-B14-B14-B3	1529.7
1230	19112	Oc1coc(c1)Sc1cscc1	B3-B15-B2-B7	1478.48
1231	19132	Oc1csc(c1)c1ccc(s1)O	B7-B7-B3-B3	1530.84
1232	19135	Oc1csc(c1)c1cocc1S	B2-B15-B7-B3	1538.07
1233	19136	Oc1csc(c1)c1cscc1O	B7-B7-B3-B3	1558.13
1234	19137	Oc1csc(c1)c1nnc(s1)C	B1-B8-B7-B3	1494.65
1235	19149	Oc1csc(c1c1cocc1)S	B2-B7-B3-B15	1564.04
1236	19150	Oc1csc(c1c1nncs1)C	B3-B7-B1-B8	1548.75
1237	19152	Oc1csc(n1)Cc1cncs1	B1-B14-B14-B3	1494.17
1238	19162	Oc1cscc1Oc1ccsc1	B3-B7-B3-B7	1477.44
1239	19220	Oc1sc(cc1O)c1cccs1	B3-B7-B3-B7	1523.21
1240	19235	Oc1scc(c1)c1occ(c1)S	B2-B15-B7-B3	1525.81
1241	19259	Oc1sccc1c1cocc1S	B2-B15-B7-B3	1569.09
1242	19260	Oc1sccc1c1cscc1O	B7-B7-B3-B3	1577.4
1243	19269	SC(c1nsnc1)c1ccco1	B1-B13-B2-B15	1508.59
1244	19275	SC1(CCCC1)c1cscc1C	B2-B10-B7-B1	1223.35
1245	19306	SCC1CCC(C1)c1cscc1	B1-B10-B2-B7	1200.14
1246	19334	SOc1ccc(s1)c1cocc1	B2-B3-B7-B15	1483.58
1247	19360	SSc1coc(c1)c1cocc1	B2-B15-B2-B15	1477.2
1248	19388	Sc1ccc(o1)Oc1cccs1	B3-B15-B2-B7	1445.11
1249	19408	Sc1ccc(s1)c1occc1O	B2-B7-B15-B3	1514.63
1250	19412	Sc1ccoc1Oc1cscc1	B3-B15-B2-B7	1464.45
1251	19417	Sc1ccoc1c1nsnc1C	B2-B15-B13-B1	1548.66
1252	19429	Sc1coc(c1)Sc1cocc1	B2-B15-B2-B15	1463.51
1253	19454	Sc1cocc1Oc1cccs1	B3-B15-B2-B7	1457.46
1254	19457	Sc1cocc1Sc1ccoc1	B2-B15-B2-B15	1466.64
1255	19462	Sc1csc(c1)Oc1ccco1	B2-B7-B3-B15	1461.79
1256	19530	Sc1occc1c1occc1S	B15-B15-B2-B2	1536.94
1257	19546	Sc1sccc1Oc1ccoc1	B2-B7-B3-B15	1464.25
1258	19548	c1coc(c1)CSc1nncs1	B2-B8-B1-B15	1464.81
1259	19560	c1csc(n1)OCc1nccs1	B3-B14-B1-B14	1475.4
1260	19609	CC1(C)NCN(CN1)c1scnn1	B8-B9-B1-B1	1373.92
1261	19629	CC1(NCNCN1)c1ccc(o1)S	B1-B9-B15-B2	1396.06
1262	19638	CC1(NCNCN1)c1scc(c1)O	B1-B9-B7-B3	1418.2
1263	19646	CC1(S)CCC(C1)c1cscn1	B1-B10-B14-B2	1251.08
1264	19667	CC1CCC(C1)Sc1cncs1	B1-B10-B2-B14	1228.06
1265	19673	CC1CCC(C1)c1ncsc1S	B1-B10-B14-B2	1245.39
1266	19678	CC1CCC(C1S)c1nccs1	B1-B10-B14-B2	1247.23
1267	19731	CC1NCN(CN1)c1sccc1O	B1-B9-B7-B3	1406.16
1268	19751	CC1NCNC(N1)c1cocc1S	B1-B9-B15-B2	1386.7
1269	19768	CC1NCNCN1Oc1cccs1	B3-B9-B7-B1	1348.61
1270	19771	CC1NCNCN1Sc1cocc1	B2-B9-B1-B15	1356.55
1271	19802	CN1C(NCNC1C)c1cnsn1	B9-B13-B1-B1	1401.88
1272	19815	CN1CN(CNC1S)c1cocc1	B2-B9-B1-B15	1389.44
1273	19817	CN1CN(O)CN(C1)c1ccsc1	B1-B9-B7-B3	1379.25
1274	19830	CN1CNC(NC1)(C)c1cnsn1	B9-B13-B1-B1	1395.76
1275	19835	CN1CNC(NC1)(S)c1cocc1	B2-B9-B1-B15	1398.09
1276	19895	CN1CNCNC1(C)c1nsnc1	B9-B13-B1-B1	1412.71
1277	19906	CN1CNCNC1c1ccc(o1)S	B1-B9-B15-B2	1390
1278	19908	CN1CNCNC1c1ccoc1S	B1-B9-B15-B2	1405.58
1279	19927	COC1NCNCN1c1cscc1	B3-B9-B7-B1	1392.81
1280	19954	COc1nsnc1c1cscn1	B3-B13-B1-B14	1601.15
1281	19991	CSc1cnc(s1)C1CCCC1	B2-B14-B1-B10	1233.96
1282	20002	CSc1occc1N1CNCNC1	B2-B15-B1-B9	1388.2
1283	20011	Cc1c(csc1O)C1NCNCN1	B3-B7-B1-B9	1419.79
1284	20036	Cc1coc(c1)N1CNCNC1S	B1-B15-B9-B2	1384.39
1285	20065	Cc1ncc(s1)c1nnc(s1)O	B1-B14-B8-B3	1565.7
1286	20069	Cc1ncsc1SC1CCCC1	B2-B14-B1-B10	1229.27
1287	20120	N1CNCN(C1)CCc1scnn1	B1-B8-B1-B9	1391.06
1288	20123	OC(c1cscc1)C1NCNCN1	B1-B3-B7-B9	1423.46
1289	20157	OC1NCNC(N1)c1scc(c1)C	B1-B7-B9-B3	1391.06
1290	20158	OC1NCNC(N1)c1sccc1C	B1-B7-B9-B3	1402.3
1291	20182	OCc1ccsc1C1NCNCN1	B1-B3-B7-B9	1437.75
1292	20198	OCc1nnc(s1)c1nccs1	B1-B8-B3-B14	1582.16
1293	20199	OCc1nsnc1c1cncs1	B1-B13-B3-B14	1653.68
1294	20215	ON1CNC(N(C1)C)c1cscc1	B1-B9-B7-B3	1397.81
1295	20224	ON1CNC(NC1)c1csc(c1)C	B1-B7-B9-B3	1385
1296	20241	ON1CNCNC1(C)c1cscc1	B1-B9-B7-B3	1379.94
1297	20247	ON1CNCNC1c1cscc1C	B1-B7-B9-B3	1400.71
1298	20263	OOc1cscc1c1cncs1	B3-B7-B3-B14	1571.37
1299	20272	OOc1scc(c1)c1nccs1	B3-B7-B3-B14	1545.8
1300	20290	OSc1coc(c1)c1nccs1	B2-B3-B15-B14	1556.91
1301	20296	OSc1ncc(s1)c1ccco1	B2-B3-B14-B15	1555.6
1302	20302	OSc1occ(c1)c1nccs1	B2-B3-B15-B14	1558.72
1303	20305	OSc1occc1c1nccs1	B2-B3-B15-B14	1584.97
1304	20340	Oc1ccc(s1)c1cnc(s1)O	B7-B14-B3-B3	1589.13
1305	20372	Oc1coc(c1)Sc1nccs1	B3-B15-B2-B14	1552.19
1306	20376	Oc1coc(c1)c1ncsc1S	B3-B15-B14-B2	1607.02
1307	20378	Oc1coc(c1)c1scnc1S	B3-B15-B14-B2	1613
1308	20383	Oc1coc(c1c1cscn1)S	B3-B15-B14-B2	1632.13
1309	20400	Oc1csc(c1)c1scc(n1)O	B7-B14-B3-B3	1606.57
1310	20409	Oc1csc(n1)Oc1cccs1	B3-B7-B14-B3	1544.06
1311	20471	Oc1nsnc1Cc1nccs1	B3-B13-B1-B14	1582.4
1312	20496	Oc1sc(c(n1)c1cscc1)O	B7-B14-B3-B3	1623.91
1313	20520	Oc1scc(c1O)c1nccs1	B3-B7-B3-B14	1617.92
1314	20529	Oc1scc(n1)c1ccc(s1)O	B7-B14-B3-B3	1600.72
1315	20533	Oc1scc(n1)c1cscc1O	B7-B14-B3-B3	1629.57
1316	20553	SC(c1ccco1)N1CNCNC1	B1-B9-B2-B15	1404.78
1317	20582	SC1CCC(C1)Cc1cscn1	B1-B10-B14-B2	1243.67
1318	20585	SC1CCC(C1)c1csc(n1)C	B1-B14-B10-B2	1237.82
1319	20587	SC1CCC(C1)c1ncsc1C	B1-B14-B10-B2	1260.34
1320	20590	SC1CCC(C1C)c1nccs1	B1-B10-B14-B2	1246.1
1321	20626	SC1NCNCN1Cc1cocc1	B2-B9-B1-B15	1400.07
1322	20629	SC1NCNCN1c1coc(c1)C	B1-B15-B9-B2	1386.86
1323	20639	SCC1CCC(C1)c1nccs1	B1-B10-B14-B2	1247.33
1324	20641	SCC1CCCC1c1cscn1	B1-B10-B14-B2	1250
1325	20648	SCC1NCNCN1c1cocc1	B1-B9-B2-B15	1406.51
1326	20660	SCc1coc(c1)C1NCNCN1	B1-B15-B9-B2	1414.86
1327	20661	SCc1coc(c1)N1CNCNC1	B1-B15-B9-B2	1410.16
1328	20673	SN1C(C)NCNC1c1ccco1	B2-B9-B1-B15	1376.81
1329	20698	SN1CNCN(C1)c1cocc1C	B1-B15-B9-B2	1376.78
1330	20708	SN1CNCNC1c1ccoc1C	B1-B15-B9-B2	1386.17
1331	20712	SN1CNCNC1c1occc1C	B1-B15-B9-B2	1371.49
1332	20719	SOc1cnc(s1)c1ccco1	B2-B3-B14-B15	1561.13
1333	20752	Sc1cc(oc1C1NCNCN1)C	B1-B15-B9-B2	1383.78
1334	20780	Sc1cnc(s1)c1occc1O	B3-B15-B14-B2	1579.4
1335	20803	Sc1cocc1Oc1cncs1	B3-B15-B14-B2	1550.75
1336	20816	Sc1nc(c(s1)c1ccco1)O	B2-B14-B3-B15	1594.52
1337	20835	Sc1oc(cc1C1NCNCN1)C	B1-B15-B9-B2	1388.5
1338	20845	Sc1occ(c1)c1ncc(s1)O	B3-B14-B15-B2	1575.78
1339	20846	Sc1occ(c1)c1ncsc1O	B3-B14-B15-B2	1596.65
1340	20882	c1occ(c1)OSc1nccs1	B2-B3-B14-B15	1501.09
1341	20885	c1occ(c1)SOc1nccs1	B2-B3-B14-B15	1497.76
1342	20886	c1scc(n1)COc1nncs1	B3-B8-B1-B14	1544.24
1343	20890	n1csc(c1)COc1scnn1	B3-B8-B1-B14	1540.74
1344	20891	n1csc(c1)OCc1scnn1	B1-B8-B3-B14	1541.15
1345	20895	s1ccc(c1)OOc1scnc1	B3-B7-B3-B14	1509.54
1346	20899	C1CCC(C1)CSc1cnsn1	B2-B13-B1-B10	1297.79
1347	20902	C1CCC(C1)OSc1cscc1	B2-B3-B7-B10	1253.09
1348	20935	CC1(NCNCN1)c1cnc(s1)O	B3-B14-B9-B1	1475.58
1349	20963	CC1CCC(C1)Sc1nsnc1	B1-B10-B2-B13	1288.01
1350	20988	CC1NC(O)NC(N1)c1nccs1	B3-B9-B14-B1	1454.42
1351	20996	CC1NCN(C(N1)O)c1cscn1	B3-B9-B14-B1	1451.21
1352	21018	CC1NCNC(N1)(C)C1NCNCN1	B1-B9-B9-B1	1304.06
1353	21022	CC1NCNC(N1)(O)c1nccs1	B3-B9-B14-B1	1461.48
1354	21029	CC1NCNC(N1)Oc1cncs1	B3-B9-B14-B1	1432.71
1355	21042	CC1NCNC(N1O)c1cncs1	B3-B9-B14-B1	1441.92
1356	21059	CC1NCNCN1c1scnc1O	B3-B14-B9-B1	1471.53
1357	21061	CC1SCCSC1c1cocc1	B1-B6-B15	1319.28
1358	21069	CCC1NCNCN1N1CNCNC1	B1-B9-B9-B1	1267.51
1359	21079	CN1CN(C(NC1)O)c1cncs1	B3-B9-B14-B1	1463.42
1360	21093	CN1CNC(N(C1)N1CNCNC1)C	B1-B9-B9-B1	1262.83
1361	21102	CN1CNC(NC1)(O)c1scnc1	B3-B9-B14-B1	1468.68
1362	21128	CN1CNCN(C1)C1(C)NCNCN1	B1-B9-B9-B1	1287.37
1363	21184	CON1CN(CNC1)c1cncs1	B3-B9-B14-B1	1424.92
1364	21188	CON1CNC(NC1)c1scnc1	B3-B9-B14-B1	1431.48
1365	21212	CSC1CCC(C1)c1nsnc1	B2-B10-B1-B13	1303.96
1366	21214	CSC1CCCC1c1nsnc1	B2-B10-B1-B13	1302.29
1367	21221	Cc1cc(S)cc(c1)c1ccccc1	B2-B5-B1-B5	1172.35
1368	21224	Cc1ccc(c(c1)c1ccccc1)S	B2-B5-B1-B5	1160.78
1369	21255	Cc1nsnc1Oc1cnsn1	B3-B13-B1-B13	1644.66
1370	21267	N1CNC(NC1)CCC1NCNCN1	B1-B9-B1-B9	1320.91
1371	21287	OC(c1scnn1)c1scnn1	B1-B8-B3-B8	1628.39
1372	21291	OC1(CCCC1)c1ccsc1S	B2-B7-B10-B3	1322.17
1373	21293	OC1(CCCC1)c1scc(c1)S	B2-B7-B10-B3	1307.76
1374	21308	OC1CC(C(C1)c1cscc1)S	B2-B10-B3-B7	1325.56
1375	21319	OC1CCC(C1S)c1cccs1	B2-B10-B3-B7	1315.67
1376	21324	OC1CCCC1(S)c1cscc1	B2-B10-B3-B7	1327.66
1377	21325	OC1CCCC1Sc1cccs1	B2-B10-B3-B7	1282.54
1378	21346	OC1NCNC(N1)(C)c1cncs1	B3-B9-B14-B1	1476.96
1379	21347	OC1NCNC(N1)(C)c1cscn1	B3-B9-B14-B1	1475.61
1380	21393	OCc1ncc(s1)N1CNCNC1	B9-B14-B1-B3	1483.34
1381	21426	ON1CNC(NC1C)c1nccs1	B3-B9-B14-B1	1448.31
1382	21432	ON1CNCN(C1)c1ncc(s1)C	B3-B9-B14-B1	1430.57
1383	21444	ON1CNCNC1c1csc(n1)C	B3-B9-B14-B1	1447.31
1384	21451	OOc1ccsc1c1nncs1	B3-B7-B3-B8	1613.72
1385	21469	OOc1nnc(s1)c1cccs1	B3-B8-B3-B7	1586.28
1386	21472	OOc1nsnc1c1cscc1	B3-B13-B3-B7	1657.12
1387	21478	OOc1sccc1c1nncs1	B3-B7-B3-B8	1627.05
1388	21505	OSc1occ(c1)c1nncs1	B2-B3-B15-B8	1621.9
1389	21507	OSc1occc1c1nncs1	B2-B3-B15-B8	1648.51
1390	21509	OSc1scc(c1)C1CCCC1	B2-B3-B7-B10	1288.88
1391	21545	Oc1cnc(s1)c1ncsc1O	B3-B14-B14-B3	1694.94
1392	21597	Oc1ncsc1Oc1cscn1	B3-B14-B14-B3	1638.83
1393	21600	Oc1ncsc1c1scnc1O	B3-B14-B14-B3	1723.05
1394	21602	Oc1nnc(s1)Cc1nsnc1	B3-B8-B1-B13	1639.12
1395	21616	Oc1nsnc1Oc1cccs1	B3-B13-B3-B7	1640.66
1396	21630	Oc1occc1Sc1nncs1	B3-B15-B2-B8	1617.43
1397	21638	Oc1sc(cc1O)c1cnsn1	B3-B7-B3-B13	1706.32
1398	21645	Oc1scc(c1)C1(S)CCCC1	B2-B10-B7-B3	1327.65
1399	21657	Oc1scc(n1)Oc1cncs1	B3-B14-B14-B3	1639.2
1400	21661	Oc1scc(n1)c1ncc(s1)O	B3-B14-B14-B3	1679.2
1401	21668	Oc1sccc1c1nsnc1O	B3-B13-B7-B3	1736.03
1402	21675	Oc1scnc1c1scnc1O	B3-B14-B14-B3	1720.63
1403	21683	SC1(CCCC1)Sc1ccco1	B2-B10-B2-B15	1280.76
1404	21687	SC1(CCCC1)c1ccoc1S	B10-B15-B2-B2	1313.47
1405	21710	SC1CCC(C1)(C)c1nsnc1	B1-B10-B2-B13	1329.02
1406	21733	SC1CCC(C1)c1scc(c1)O	B2-B10-B7-B3	1306.91
1407	21758	SC1CCCC1c1cocc1S	B10-B15-B2-B2	1307.04
1408	21765	SC1CCCC1c1scc(c1)O	B2-B10-B7-B3	1312.48
1409	21802	SOc1occc1c1nncs1	B2-B3-B15-B8	1637.91
1410	21808	SSC1CCC(C1)c1ccco1	B2-B10-B2-B15	1271.26
1411	21821	Sc1c(coc1S)C1CCCC1	B2-B15-B2-B10	1292.56
1412	21823	Sc1cc(c(o1)c1nncs1)O	B3-B15-B2-B8	1654.75
1413	21842	Sc1ccc(s1)OC1CCCC1	B2-B7-B3-B10	1268.19
1414	21867	Sc1csc(c1C1CCCC1)O	B2-B7-B3-B10	1326.7
1415	21871	Sc1nnc(s1)Oc1cocc1	B2-B8-B3-B15	1603.93
1416	21895	Sc1sc(cc1C1CCCC1)O	B2-B7-B3-B10	1314.63
1417	21942	C1NCN(CN1)CSC1CCCC1	B1-B9-B2-B10	1215.95
1418	22033	CC1NCNCN1SC1CCCC1	B2-B9-B1-B10	1188.55
1419	22058	CN1CNC(NC1)Oc1scnn1	B3-B8-B9-B1	1493.58
1420	22078	CN1CNCN(C1c1cnsn1)O	B9-B13-B3-B1	1529.48
1421	22087	CN1CNCNC1SC1CCCC1	B2-B9-B1-B10	1212.64
1422	22099	CON1CN(CNC1)c1nncs1	B8-B9-B3-B1	1474.82
1423	22101	CON1CNC(NC1)c1scnn1	B8-B9-B3-B1	1483.94
1424	22105	COc1nnc(s1)N1CNCNC1	B3-B8-B1-B9	1505.74
1425	22111	CSC1CCC(C1)C1NCNCN1	B2-B10-B1-B9	1215.17
1426	22121	CSc1ccc(cc1)c1ccccn1	B2-B5-B1-B11	1214.54
1427	22122	CSc1ccc(cc1)c1cccnc1	B2-B5-B1-B11	1212.74
1428	22142	Cc1c(S)cccc1c1ccncc1	B1-B5-B11-B2	1223.87
1429	22146	Cc1cc(S)cc(c1)c1ccncc1	B1-B5-B11-B2	1228.32
1430	22148	Cc1ccc(c(c1)S)c1ccccn1	B1-B5-B11-B2	1214.78
1431	22150	Cc1ccc(c(c1)S)c1ccncc1	B1-B5-B11-B2	1216.43
1432	22167	Cc1ccc(cc1)c1nccc(c1)S	B1-B5-B11-B2	1218.87
1433	22179	Cc1cccc(c1)Sc1cccnc1	B2-B5-B1-B11	1182.51
1434	22180	Cc1cccc(c1)Sc1ccncc1	B2-B5-B1-B11	1186.93
1435	22189	Cc1cccc(c1)c1ncccc1S	B1-B5-B11-B2	1210.42
1436	22198	Cc1ccccc1c1cccnc1S	B1-B5-B11-B2	1199.68
1437	22204	Cc1ccnc(c1)c1cccc(c1)S	B1-B11-B5-B2	1220.61
1438	22223	Cc1nccc(c1)c1ccccc1S	B1-B11-B5-B2	1213.99
1439	22233	N1CNC(NC1)OCc1scnn1	B1-B8-B3-B9	1508.08
1440	22237	N1CNC(NC1)OSc1cocc1	B2-B3-B9-B15	1489.73
1441	22255	OC1(CCCC1)c1csc(n1)S	B10-B14-B3-B2	1364.88
1442	22281	OC1(O)NCNCN1c1cscc1	B3-B9-B3-B7	1533.46
1443	22308	OC1CCC(C1)c1csc(n1)S	B10-B14-B3-B2	1368.8
1444	22320	OC1CCCC1(S)c1cscn1	B10-B14-B3-B2	1388.84
1445	22340	OC1NCN(C(N1)S)c1cocc1	B2-B9-B3-B15	1535.47
1446	22392	OC1NCNC(N1c1cccs1)O	B3-B9-B3-B7	1540.24
1447	22408	OC1NCNCN1c1cscc1O	B3-B9-B7-B3	1551.24
1448	22421	OCN1CN(CNC1)c1cnsn1	B9-B13-B1-B3	1551.2
1449	22427	OCc1nnc(s1)C1NCNCN1	B1-B8-B3-B9	1538.87
1450	22444	ON1CN(S)CN(C1)c1ccoc1	B2-B9-B3-B15	1493.41
1451	22453	ON1CNC(N(C1)c1cocc1)S	B2-B9-B3-B15	1515.99
1452	22456	ON1CNC(NC1)(C)c1scnn1	B8-B9-B3-B1	1487.81
1453	22483	ON1CNC(NC1O)c1cccs1	B3-B9-B3-B7	1526.19
1454	22490	ON1CNCN(C1)Oc1cscc1	B3-B9-B3-B7	1469.53
1455	22548	OOC1NCNCN1c1cscc1	B3-B9-B3-B7	1503.07
1456	22614	OSc1coc(c1)N1CNCNC1	B2-B3-B15-B9	1519.67
1457	22619	OSc1ncsc1C1CCCC1	B2-B3-B14-B10	1349.58
1458	22631	Oc1c(coc1S)N1CNCNC1	B3-B15-B9-B2	1542.45
1459	22657	Oc1coc(c1)SN1CNCNC1	B3-B15-B2-B9	1507.73
1460	22666	Oc1csc(n1)Oc1nsnc1	B3-B13-B14-B3	1736.56
1461	22679	Oc1ncc(s1)SC1CCCC1	B2-B14-B3-B10	1349.28
1462	22687	Oc1nnc(s1)CN1CNCNC1	B3-B8-B1-B9	1520.85
1463	22702	Oc1occ(c1)SN1CNCNC1	B3-B15-B2-B9	1486.32
1464	22719	Oc1scc(n1)Oc1nncs1	B3-B8-B14-B3	1701.92
1465	22725	Oc1scnc1Oc1nncs1	B3-B8-B14-B3	1708.53
1466	22745	SC1(CCCC1)c1scnc1O	B3-B14-B10-B2	1386.95
1467	22769	SC1CCC(C1)C1NCNC(N1)C	B1-B9-B10-B2	1215.75
1468	22798	SC1CCCC1Oc1cscn1	B3-B14-B10-B2	1347.07
1469	22822	SC1NCN(CN1)c1cscc1	B2-B9-B7	1495.82
1470	22845	SC1NCNCN1c1ccc(o1)O	B3-B15-B9-B2	1530.97
1471	22870	SCc1cccc(c1)c1ccccn1	B1-B5-B11-B2	1228.47
1472	22883	SCc1ncccc1c1ccccc1	B1-B11-B5-B2	1217.27
1473	22888	SN1CN(CNC1O)c1ccco1	B2-B9-B3-B15	1505.81
1474	22890	SN1CNC(N(C1)C)C1CCCC1	B2-B9-B1-B10	1211.54
1475	22895	SN1CNC(N(C1)c1cocc1)O	B2-B9-B3-B15	1517
1476	22910	SN1CNC(NC1)c1cscc1	B2-B9-B7	1473.69
1477	22919	SN1CNCN(C1)Oc1ccco1	B2-B9-B3-B15	1453.4
1478	22922	SN1CNCN(C1)c1cccs1	B2-B9-B7	1467.81
1479	22939	SN1CNCNC1Oc1cocc1	B2-B9-B3-B15	1487.71
1480	22960	SOC1NCN(CN1)c1cocc1	B2-B3-B9-B15	1508.56
1481	22999	Sc1cc(oc1N1CNCNC1)O	B3-B15-B9-B2	1545.63
1482	23010	Sc1ccc(cc1)Cc1ccccn1	B1-B11-B5-B2	1199.63
1483	23012	Sc1ccc(cc1)Cc1ccncc1	B1-B11-B5-B2	1207.32
1484	23031	Sc1ccc(nc1C)c1ccccc1	B1-B11-B5-B2	1218.4
1485	23035	Sc1ccc(s1)N1CNCNC1	B2-B7-B9	1478.16
1486	23038	Sc1cccc(c1)Cc1ccncc1	B1-B11-B5-B2	1204.44
1487	23054	Sc1ccccc1c1ncccc1C	B1-B11-B5-B2	1198.69
1488	23058	Sc1ccnc(c1C)c1ccccc1	B1-B11-B5-B2	1219.86
1489	23069	Sc1cnc(s1)OC1CCCC1	B2-B14-B3-B10	1324.53
1490	23087	Sc1nc(sc1O)C1CCCC1	B2-B14-B3-B10	1358.13
1491	23111	c1ccc(cc1)CSc1cccnc1	B1-B5-B2-B11	1188.4
1492	23141	C1CCC(C1)c1occc1c1ccco1	B10-B15-B15	1195.62
1493	23143	C1CSC(CS1)CC1CCCC1	B1-B6-B10	1157.75
1494	23156	CC1(O)NCNC(N1)N1CNCNC1	B1-B9-B9-B3	1393.76
1495	23167	CC1NCN(C(N1)N1CNCNC1)O	B1-B9-B9-B3	1377.9
1496	23207	CN1CNC(NC1)C1NCNC(N1)O	B1-B9-B9-B3	1412.3
1497	23239	CON1CNC(NC1)C1NCNCN1	B3-B9-B9-B1	1383.73
1498	23251	CSc1ccc(nc1)c1ccncc1	B2-B11-B11-B1	1264.45
1499	23268	CSc1cncc(c1)c1ccncc1	B2-B11-B11-B1	1268.99
1500	23292	Cc1ccc(c(n1)S)c1ccccn1	B1-B11-B11-B2	1264.33
1501	23320	Cc1ccc(nc1)c1ccncc1S	B1-B11-B11-B2	1273.79
1502	23334	Cc1cccc(n1)Sc1ccccn1	B2-B11-B11-B1	1225.76
1503	23370	Cc1ccncc1c1ccncc1S	B1-B11-B11-B2	1266.2
1504	23376	Cc1cnc(c(c1)c1cccnc1)S	B1-B11-B11-B2	1270.77
1505	23395	Cc1cncc(c1S)c1ccccn1	B1-B11-B11-B2	1284.85
1506	23415	Cc1ncc(c(c1)c1ccncc1)S	B1-B11-B11-B2	1274.61
1507	23435	N1CNC(NC1)CON1CNCNC1	B3-B9-B1-B9	1386.47
1508	23443	N1CNC(NC1)Sc1scnc1	B2-B14-B9	1547.52
1509	23465	OC1(NCNCN1)c1ncc(s1)O	B3-B9-B14-B3	1617.2
1510	23469	OC1(O)NCN(CN1)c1nccs1	B3-B9-B3-B14	1595.79
1511	23470	OC1(O)NCN(CN1)c1ncsc1	B3-B9-B3-B14	1608.63
1512	23484	OC1CC(C(C1)S)c1cnsn1	B2-B10-B3-B13	1463.92
1513	23488	OC1CCC(C1)(S)c1nncs1	B2-B10-B3-B8	1440.22
1514	23495	OC1CCC(C1S)c1nncs1	B2-B10-B3-B8	1433.18
1515	23498	OC1CCCC1(S)c1nncs1	B2-B10-B3-B8	1439.63
1516	23501	OC1CCCC1Sc1nsnc1	B2-B10-B3-B13	1431.19
1517	23504	OC1CSC(CS1)c1ccco1	B3-B6-B15	1434.59
1518	23510	OC1N(CNCN1O)c1cncs1	B3-B9-B3-B14	1589.24
1519	23547	OC1NCNC(N1)C1(C)NCNCN1	B1-B9-B9-B3	1415.01
1520	23560	OC1NCNC(N1)c1scnc1O	B3-B9-B14-B3	1619.24
1521	23594	OCN1CNCNC1N1CNCNC1	B1-B9-B9-B3	1417.02
1522	23609	ON1CNC(N(C1)O)c1cncs1	B3-B9-B3-B14	1589.11
1523	23612	ON1CNC(N(C1)c1nccs1)O	B3-B9-B3-B14	1583.78
1524	23670	ON1CNCNC1N1CNCNC1C	B1-B9-B9-B3	1389.54
1525	23673	ON1CNCNC1Oc1nccs1	B3-B9-B3-B14	1560.75
1526	23678	ON1CNCNC1c1scc(n1)O	B3-B9-B14-B3	1604.43
1527	23695	OON1CNC(NC1)c1ncsc1	B3-B9-B3-B14	1554.42
1528	23711	OOc1nsnc1c1nncs1	B3-B13-B3-B8	1797.55
1529	23718	OSC1(CCCC1)c1scnn1	B2-B3-B10-B8	1398.01
1530	23727	OSc1nsnc1C1CCCC1	B2-B3-B13-B10	1421.18
1531	23732	Oc1ccc(c(c1)c1ccccc1)S	B3-B5-B2-B5	1270.19
1532	23761	Oc1nsnc1Oc1cnsn1	B3-B13-B3-B13	1840.76
1533	23764	Oc1nsnc1c1nsnc1O	B3-B13-B13-B3	1921.67
1534	23778	SC(c1cccnc1)c1cccnc1	B1-B11-B11-B2	1274.13
1535	23786	SC1(CCCC1)c1nnc(s1)O	B3-B8-B10-B2	1424.43
1536	23798	SC1CCC(C1)(O)c1nsnc1	B2-B10-B3-B13	1461.65
1537	23805	SC1CCC(C1)SC1CCCC1	B2-B10-B2-B10	1122.71
1538	23822	SC1NCN(CN1)c1scnc1	B2-B9-B14	1564.43
1539	23858	SCc1nccc(c1)c1ccccn1	B1-B11-B11-B2	1278.93
1540	23896	Sc1cc(C)nc(c1)c1ccncc1	B1-B11-B11-B2	1269.84
1541	23901	Sc1ccc(c(n1)C)c1ccccn1	B1-B11-B11-B2	1268.21
1542	23904	Sc1ccc(c(n1)c1ccccn1)C	B1-B11-B11-B2	1265.21
1543	23924	Sc1ccc(cn1)c1ncccc1C	B1-B11-B11-B2	1271.06
1544	23934	Sc1ccc(nc1)c1nccc(c1)C	B1-B11-B11-B2	1263.54
1545	23944	Sc1cccc(c1)c1nccnc1C	B1-B12-B5-B2	1268.91
1546	23961	Sc1cccnc1c1ncccc1C	B1-B11-B11-B2	1254.91
1547	23964	Sc1ccnc(c1)Cc1ccncc1	B1-B11-B11-B2	1261.43
1548	23972	Sc1ccnc(c1)c1ncccc1C	B1-B11-B11-B2	1266.85
1549	24032	Sc1nccc(c1)Cc1cccnc1	B1-B11-B11-B2	1261.96
1550	24037	Sc1nccc(c1)c1cncc(c1)C	B1-B11-B11-B2	1290.17
1551	24049	Sc1nnc(s1)OC1CCCC1	B2-B8-B3-B10	1379.7
1552	24079	CSc1cccc(n1)c1cnccn1	B2-B11-B12-B1	1304.31
1553	24124	Cc1cnc(c(n1)S)c1ccccn1	B1-B12-B2-B11	1322.78
1554	24158	Cc1ncc(c(c1)c1cnccn1)S	B1-B11-B12-B2	1329.51
1555	24160	Cc1ncc(nc1S)c1ccccn1	B1-B12-B2-B11	1321.11
1556	24172	N1CNC(NC1)OSC1CCCC1	B2-B3-B9-B10	1294.35
1557	24176	N1CNCN(C1)OOc1cnsn1	B3-B9-B3-B13	1602.29
1558	24177	N1CNCN(C1)OOc1scnn1	B3-B9-B3-B8	1574.88
1559	24183	OC1(NCNCN1)Oc1cnsn1	B3-B9-B3-B13	1673.33
1560	24198	OC1(S)NCN(CN1)C1CCCC1	B2-B9-B3-B10	1320.24
1561	24229	OC1NCN(C(N1)O)c1nncs1	B3-B9-B3-B8	1669.28
1562	24238	OC1NCN(CN1)c1nsnc1O	B9-B13-B3-B3	1719.55
1563	24243	OC1NCNC(N1)(S)C1CCCC1	B2-B9-B3-B10	1342.96
1564	24247	OC1NCNC(N1)Oc1nsnc1	B3-B9-B3-B13	1669.87
1565	24252	OC1NCNC(N1c1cnsn1)O	B3-B9-B3-B13	1703.04
1566	24258	OC1NCNCN1c1nnc(s1)O	B8-B9-B3-B3	1670.03
1567	24261	ON1C(NCNC1O)c1nncs1	B3-B9-B3-B8	1653.6
1568	24262	ON1C(S)NCNC1C1CCCC1	B2-B9-B3-B10	1309.47
1569	24284	ON1CNC(NC1O)c1nncs1	B3-B9-B3-B8	1658.62
1570	24289	ON1CNCN(C1)C1(S)CCCC1	B3-B9-B10-B2	1333.29
1571	24296	ON1CNCN(C1C1CCCC1)S	B2-B9-B3-B10	1302.21
1572	24306	ON1CNCNC1Oc1nsnc1	B3-B9-B3-B13	1651.32
1573	24312	OOC1NC(NCN1)c1cnsn1	B3-B9-B3-B13	1655.32
1574	24327	OOc1nsnc1N1CNCNC1	B3-B13-B3-B9	1657.95
1575	24347	OSc1cccc(c1)c1cccnc1	B2-B3-B5-B11	1321.17
1576	24354	OSc1ccnc(c1)c1ccccc1	B2-B3-B11-B5	1313.48
1577	24383	Oc1ccc(cc1)c1ccnc(c1)S	B3-B5-B11-B2	1340.84
1578	24388	Oc1ccc(cc1)c1ncccc1S	B3-B5-B11-B2	1337.13
1579	24392	Oc1ccc(cn1)Sc1ccccc1	B2-B11-B3-B5	1284.7
1580	24415	Oc1ccccc1Sc1ccccn1	B3-B5-B2-B11	1293.61
1581	24428	Oc1ccncc1Sc1ccccc1	B2-B11-B3-B5	1291.32
1582	24429	Oc1ccncc1c1ccccc1S	B3-B11-B5-B2	1331.19
1583	24434	Oc1cncc(c1)c1ccccc1S	B3-B11-B5-B2	1338.77
1584	24444	Oc1ncccc1Sc1ccccc1	B2-B11-B3-B5	1297.01
1585	24464	SC1CCC(C1)C1(O)NCNCN1	B3-B9-B10-B2	1346.99
1586	24472	SC1CCC(C1O)C1NCNCN1	B2-B10-B3-B9	1362.13
1587	24477	SC1CCCC1N1CNCNC1O	B3-B9-B10-B2	1346.08
1588	24493	SC1NCNCN1C1(O)CCCC1	B9-B10-B3-B2	1337.84
1589	24494	SC1NCNCN1OC1CCCC1	B2-B9-B3-B10	1293.08
1590	24500	SCc1cccnc1c1nccnc1	B1-B11-B12-B2	1335.8
1591	24598	Sc1ccc(cc1)c1ccncc1O	B3-B11-B5-B2	1339.82
1592	24600	Sc1ccc(cc1)c1cnccc1O	B3-B11-B5-B2	1334.76
1593	24601	Sc1ccc(cc1)c1nccc(c1)O	B3-B11-B5-B2	1339.39
1594	24622	Sc1cccc(c1)Oc1cccnc1	B3-B5-B2-B11	1289.74
1595	24629	Sc1cccc(c1)c1cncc(c1)O	B3-B11-B5-B2	1351.15
1596	24640	Sc1ccccc1c1cccnc1O	B3-B11-B5-B2	1331.74
1597	24643	Sc1cccnc1Cc1nccnc1	B1-B12-B11-B2	1328.16
1598	24670	Sc1cnc(cn1)Cc1ccccn1	B1-B12-B2-B11	1308.41
1599	24692	Sc1cncc(n1)c1cnccc1C	B1-B11-B12-B2	1323.58
1600	24722	c1ccc(cc1)OSc1cccnc1	B2-B3-B11-B5	1277.16
1601	24739	C1CCC(C1)c1ccc(o1)C1CCCC1	B10-B15-B10	1038.59
1602	24741	C1CCC(C1)c1occ(c1)C1CCCC1	B10-B15-B10	1048.92
1603	24743	C1CSC(CS1)OC1CCCC1	B3-B6-B10	1223.27
1604	24759	N1CNC(NC1)OOC1NCNCN1	B3-B9-B3-B9	1516.07
1605	24769	OC1(O)NCN(CN1)C1NCNCN1	B3-B9-B3-B9	1536.34
1606	24794	OC1NCNC(N1)(O)C1NCNCN1	B3-B9-B3-B9	1562.03
1607	24808	OC1NCNCN1OC1NCNCN1	B3-B9-B3-B9	1507.14
1608	24823	ON1CNC(NC1)C1NCNC(N1)O	B3-B9-B9-B3	1533.39
1609	24826	ON1CNC(NC1)N1CNCN(C1)O	B3-B9-B9-B3	1501.64
1610	24847	ON1CNCNC1OC1NCNCN1	B3-B9-B3-B9	1520.67
1611	24862	OON1CNCNC1N1CNCNC1	B3-B9-B3-B9	1492.48
1612	24875	OSc1cccnc1c1ccccn1	B2-B3-B11-B11	1359.11
1613	24897	OSc1ncccc1c1ccncc1	B2-B3-B11-B11	1366.95
1614	24950	Oc1cccc(c1S)c1cnccn1	B3-B5-B2-B12	1402.41
1615	24962	Oc1cccnc1Sc1ccccn1	B2-B11-B3-B11	1349.13
1616	25011	Oc1cncc(c1)c1cnccc1S	B3-B11-B11-B2	1404.37
1617	25072	SOc1ccc(cn1)c1ccccn1	B2-B3-B11-B11	1374.28
1618	25100	SOc1nccc(c1)c1ccccn1	B2-B3-B11-B11	1380.95
1619	25109	Sc1c(O)nccc1c1ccccn1	B2-B11-B3-B11	1401.88
1620	25113	Sc1cc(O)nc(c1)c1cccnc1	B2-B11-B3-B11	1403.68
1621	25115	Sc1ccc(c(c1)O)c1cnccn1	B3-B5-B2-B12	1397.12
1622	25125	Sc1ccc(cc1)c1cncc(n1)O	B3-B12-B5-B2	1394.98
1623	25128	Sc1ccc(cn1)Oc1cccnc1	B2-B11-B3-B11	1353.74
1624	25135	Sc1ccc(cn1)c1cnccc1O	B3-B11-B11-B2	1396.76
1625	25145	Sc1ccc(nc1)c1cnccc1O	B3-B11-B11-B2	1393.85
1626	25152	Sc1cccc(c1)c1cnc(cn1)O	B3-B12-B5-B2	1402.24
1627	25159	Sc1cccc(n1)c1cccnc1O	B3-B11-B11-B2	1391.79
1628	25195	Sc1cnc(c(c1)O)c1ccncc1	B2-B11-B3-B11	1397.32
1629	25198	Sc1cnc(c(c1)c1ccncc1)O	B2-B11-B3-B11	1403.97
1630	25221	Sc1cncc(c1O)c1ccncc1	B2-B11-B3-B11	1413.03
1631	25287	OSc1cnccc1c1cnccn1	B2-B3-B11-B12	1431.35
1632	25294	Oc1c(S)ccnc1c1nccnc1	B2-B11-B3-B12	1461.81
1633	25296	Oc1cc(S)nc(c1)c1nccnc1	B2-B11-B3-B12	1452.74
1634	25309	Oc1cccc(n1)c1cncc(n1)S	B3-B11-B12-B2	1448.94
1635	25311	Oc1cccnc1Sc1nccnc1	B2-B11-B3-B12	1415.18
1636	25312	Oc1cccnc1c1nccnc1S	B3-B11-B12-B2	1453.05
1637	25325	Oc1cnc(c(n1)c1ccccn1)S	B3-B12-B2-B11	1456.74
1638	25348	Oc1cncc(n1)c1ccncc1S	B3-B12-B11-B2	1466.57
1639	25371	SOc1cccnc1c1nccnc1	B2-B3-B11-B12	1435.92
1640	25390	Sc1ccc(c(n1)O)c1cnccn1	B2-B11-B3-B12	1462.02
1641	25408	Sc1ccnc(c1)c1cncc(n1)O	B3-B12-B11-B2	1454.5
1642	25423	Sc1cnc(cn1)Oc1cccnc1	B3-B12-B2-B11	1415.14
1643	25428	Sc1cnc(cn1)c1ccncc1O	B3-B11-B12-B2	1460.49
1644	25451	Sc1nccc(c1)Oc1cnccn1	B2-B11-B3-B12	1422.78
1645	25457	Sc1nccnc1Oc1cccnc1	B3-B12-B2-B11	1419.49
1646	25474	CSSc1ccc2c(c1)cccc2	B2-B16-B2-B1	1259.78
1647	25476	CSc1c(S)ccc2c1cccc2	B2-B16-B2-B1	1311.41
1648	25493	CSc1cccc2c1ccc(c2)S	B2-B16-B2-B1	1314.43
1649	25509	Cc1ccc(c(c1)S)c1cccs1	B2-B5-B1-B7	1272.14
1650	25528	Cc1ccc2c(c1)c(S)cc(c2)S	B2-B16-B2-B1	1335.52
1651	25530	Cc1ccc2c(c1)cc(c(c2)S)S	B2-B16-B2-B1	1326.87
1652	25539	Cc1cccc(c1)c1cscc1S	B5-B7-B2-B1	1273.5
1653	25561	Cc1scc(c1)c1ccccc1S	B5-B7-B2-B1	1255.36
1654	25562	Cc1scc(c1S)c1ccccc1	B2-B7-B1-B5	1269.19
1655	25586	SCc1cc(S)cc2c1cccc2	B1-B2-B16-B2	1338.38
1656	25591	SCc1ccc(s1)c1ccccc1	B1-B7-B2-B5	1280.34
1657	25592	SCc1ccc2c(c1)c(S)ccc2	B2-B16-B1-B2	1337.54
1658	25617	SSc1cc(C)cc2c1cccc2	B2-B16-B2-B1	1298.58
1659	25625	SSc1cccc2c1c(C)ccc2	B2-B16-B2-B1	1312.94
1660	25697	Sc1csc(c1)Cc1ccccc1	B2-B7-B1-B5	1247.22
1661	25702	Sc1ncc(nc1O)c1cnccn1	B3-B12-B2-B12	1521.1
1662	25721	CSc1ccc(cn1)c1cccs1	B2-B11-B7-B1	1320.55
1663	25723	CSc1ccc(nc1)c1cccs1	B2-B11-B7-B1	1320.94
1664	25730	CSc1cccc(c1)c1nccs1	B2-B5-B1-B14	1325.83
1665	25733	CSc1ccccc1c1cncs1	B2-B5-B1-B14	1324.78
1666	25743	CSc1ccsc1c1cccnc1	B2-B7-B1-B11	1329.02
1667	25753	CSc1csc(n1)c1ccccc1	B2-B14-B1-B5	1316.18
1668	25780	Cc1cc(sc1S)c1cccnc1	B2-B7-B1-B11	1346.34
1669	25844	Cc1cccc(n1)Sc1cscc1	B2-B7-B11-B1	1292.77
1670	25873	Cc1ccncc1c1ccsc1S	B1-B11-B7-B2	1313.67
1671	25880	Cc1cnc(c(c1)S)c1cscc1	B1-B11-B7-B2	1325.82
1672	25900	Cc1cnccc1c1ccsc1S	B1-B11-B7-B2	1319.15
1673	25905	Cc1csc(c1)Sc1ccncc1	B2-B7-B1-B11	1285.26
1674	25935	Cc1nccc(c1)Sc1cccs1	B2-B7-B11-B1	1292.64
1675	25940	Cc1nccc(c1)c1scc(c1)S	B1-B11-B7-B2	1337.87
1676	25969	Cc1sccc1Sc1ccccn1	B2-B7-B1-B11	1300.18
1677	25980	SC(c1cscn1)c1ccccc1	B1-B14-B2-B5	1336.01
1678	25984	SCc1ccc(cc1)c1nccs1	B1-B5-B2-B14	1342.95
1679	25990	SCc1ccc(s1)c1cccnc1	B1-B7-B2-B11	1345.01
1680	26010	SCc1cncc(c1)c1cccs1	B1-B11-B7-B2	1353.41
1681	26019	SCc1cscc1c1cccnc1	B1-B7-B2-B11	1343.17
1682	26032	SCc1sccc1c1cccnc1	B1-B7-B2-B11	1338.62
1683	26039	Sc1cc(c(s1)c1ccncc1)C	B2-B7-B1-B11	1326.92
1684	26069	Sc1ccc(cn1)c1csc(c1)C	B1-B7-B11-B2	1339.35
1685	26078	Sc1ccc(nc1)c1scc(c1)C	B1-B7-B11-B2	1327.43
1686	26088	Sc1ccc(s1)c1ncccc1C	B1-B11-B7-B2	1323.25
1687	26091	Sc1cccc(c1)Cc1nccs1	B2-B5-B1-B14	1318.55
1688	26094	Sc1cccc(c1)c1ncc(s1)C	B1-B14-B5-B2	1327.08
1689	26098	Sc1cccc(c1C)c1cncs1	B2-B5-B1-B14	1345.77
1690	26111	Sc1ccccc1c1ncsc1C	B1-B14-B5-B2	1315.25
1691	26121	Sc1ccnc(c1)c1ccsc1C	B1-B7-B11-B2	1323.58
1692	26123	Sc1ccnc(c1)c1scc(c1)C	B1-B7-B11-B2	1326.1
1693	26125	Sc1ccnc(c1C)c1cccs1	B1-B11-B7-B2	1336.98
1694	26193	Sc1nccc(c1)c1cscc1C	B1-B7-B11-B2	1331.78
1695	26204	Sc1sc(c(c1)c1ccccn1)C	B2-B7-B1-B11	1313.37
1696	26213	Sc1scc(c1)c1ccncc1C	B1-B11-B7-B2	1328.48
1697	26233	c1ccc(cn1)CSc1cccs1	B2-B7-B1-B11	1306.16
1698	26250	CSc1ccc(nc1)c1cncs1	B2-B11-B14-B1	1388.63
1699	26264	CSc1ccnc(c1)c1cncs1	B2-B11-B14-B1	1392.52
1700	26284	CSc1csc(c1)c1cnccn1	B2-B7-B1-B12	1392.58
1701	26298	CSc1nccnc1c1cccs1	B2-B12-B1-B7	1382.25
1702	26318	Cc1cc(S)nc(c1)c1cscn1	B2-B11-B14-B1	1398.23
1703	26335	Cc1ccc(c(n1)c1cncs1)S	B2-B11-B14-B1	1388.43
1704	26366	Cc1ccc(nc1S)c1nccs1	B2-B11-B14-B1	1390.37
1705	26382	Cc1cccc(c1)Sc1nsnc1	B2-B5-B1-B13	1369.65
1706	26392	Cc1cccc(n1)c1cnc(s1)S	B2-B14-B11-B1	1379.21
1707	26416	Cc1ccnc(c1)c1cnc(s1)S	B2-B14-B11-B1	1385.69
1708	26430	Cc1ccncc1Sc1nccs1	B2-B14-B11-B1	1362.42
1709	26468	Cc1cncc(c1)c1ncc(s1)S	B2-B14-B11-B1	1387.29
1710	26473	Cc1cncc(c1S)c1cscn1	B2-B11-B14-B1	1402.41
1711	26496	Cc1csc(c1)c1cncc(n1)S	B2-B12-B7-B1	1392.15
1712	26559	Cc1ncsc1Sc1ccncc1	B2-B14-B1-B11	1364.23
1713	26562	Cc1nsnc1Sc1ccccc1	B2-B13-B1-B5	1365.73
1714	26568	Cc1sc(c(n1)c1ccccn1)S	B2-B14-B1-B11	1376.3
1715	26594	OSc1ccc(cc1)c1cscc1	B2-B3-B5-B7	1384.6
1716	26602	OSc1cccc(c1)c1cscc1	B2-B3-B5-B7	1379.84
1717	26645	Oc1ccc2c(c1S)c(S)ccc2	B2-B16-B2-B3	1485.66
1718	26648	Oc1cccc(c1)Sc1cscc1	B3-B5-B2-B7	1368.31
1719	26655	Oc1cccc(c1S)c1cscc1	B3-B5-B2-B7	1405.3
1720	26681	SC(c1cscn1)c1ccccn1	B1-B14-B2-B11	1388.28
1721	26725	SCc1cnccc1c1cscn1	B1-B11-B14-B2	1400.06
1722	26742	SCc1nccnc1c1cccs1	B1-B12-B2-B7	1398.75
1723	26799	SSc1ccc2c(c1O)cccc2	B2-B16-B2-B3	1419.78
1724	26800	SSc1cccc(c1)c1ccco1	B5-B15-B2-B2	1372.46
1725	26837	Sc1ccc(c(c1)C)c1nsnc1	B2-B5-B1-B13	1410.6
1726	26841	Sc1ccc(c(c1)S)c1cocc1	B5-B15-B2-B2	1406.05
1727	26862	Sc1ccc(cc1)c1ccoc1S	B5-B15-B2-B2	1389.63
1728	26863	Sc1ccc(cc1)c1ccsc1O	B5-B7-B2-B3	1399.7
1729	26885	Sc1ccc(cn1)c1ncc(s1)C	B2-B11-B14-B1	1392.97
1730	26922	Sc1cccc(c1)Cc1nncs1	B2-B5-B1-B8	1373.48
1731	26932	Sc1cccc(c1)c1cocc1S	B5-B15-B2-B2	1391.01
1732	26933	Sc1cccc(c1)c1cscc1O	B5-B7-B2-B3	1408.79
1733	26942	Sc1cccc(c1O)c1cccs1	B3-B5-B2-B7	1405.42
1734	26950	Sc1cccc(n1)Cc1nccs1	B1-B14-B11-B2	1371.05
1735	26963	Sc1ccccc1c1ccsc1O	B5-B7-B2-B3	1385.93
1736	26979	Sc1ccnc(c1)c1ncc(s1)C	B2-B11-B14-B1	1391.41
1737	26985	Sc1ccnc(c1C)c1nccs1	B2-B11-B14-B1	1400.67
1738	27008	Sc1cnc(cc1C)c1cscn1	B2-B11-B14-B1	1405.86
1739	27014	Sc1cnc(cn1)c1csc(c1)C	B2-B12-B7-B1	1401.23
1740	27020	Sc1cnc(s1)c1cccnc1C	B2-B14-B11-B1	1382.51
1741	27036	Sc1cncc(n1)Cc1cccs1	B1-B12-B2-B7	1372.71
1742	27050	Sc1coc(c1S)c1ccccc1	B2-B15-B2-B5	1383.03
1743	27058	Sc1csc(c1C)c1cnccn1	B2-B7-B1-B12	1394.91
1744	27059	Sc1csc(c1O)c1ccccc1	B2-B7-B3-B5	1397.64
1745	27065	Sc1csc(n1)c1cccnc1C	B2-B14-B11-B1	1377.31
1746	27090	Sc1ncc(s1)Cc1cccnc1	B2-B14-B1-B11	1363.89
1747	27095	Sc1ncc(s1)c1ncccc1C	B2-B14-B11-B1	1385.15
1748	27111	Sc1ncccc1c1scnc1C	B2-B11-B14-B1	1381.76
1749	27113	Sc1nccnc1Cc1cscc1	B1-B12-B2-B7	1385.02
1750	27142	Sc1scc(c1O)c1ccccc1	B2-B7-B3-B5	1395.06
1751	27150	Sc1scc(n1)c1ncccc1C	B2-B14-B11-B1	1383.57
1752	27171	c1ccc(cn1)SCc1nccs1	B1-B14-B2-B11	1361.23
1753	27188	n1ccc(cc1)CSc1nccs1	B2-B14-B1-B11	1370.89
1754	27200	CC1NCN(C(N1)c1ccccc1)S	B2-B9-B1-B5	1272.28
1755	27213	CC1NCNCN1Sc1ccccc1	B2-B9-B1-B5	1262.15
1756	27225	CN1CNCN(C1)c1ccc(cc1)S	B2-B5-B9-B1	1305.59
1757	27272	CSc1ncc(s1)c1cnccn1	B2-B14-B1-B12	1448.5
1758	27275	CSc1ncccc1c1nncs1	B2-B11-B8-B1	1433.95
1759	27279	CSc1nccnc1c1ncsc1	B2-B12-B1-B14	1437.31
1760	27282	CSc1nnc(s1)c1cccnc1	B2-B8-B1-B11	1444.74
1761	27293	Cc1cc(S)nc(c1)c1nsnc1	B2-B11-B13-B1	1467.61
1762	27306	Cc1ccc(cc1S)N1CNCNC1	B2-B5-B1-B9	1319.62
1763	27308	Cc1ccc(cn1)Sc1nsnc1	B2-B11-B13-B1	1427.91
1764	27328	Cc1ccccc1SC1NCNCN1	B2-B5-B1-B9	1292.02
1765	27349	Cc1cnc(c(n1)S)c1cscn1	B1-B12-B2-B14	1449.52
1766	27370	Cc1cncc(c1)c1nsnc1S	B2-B13-B11-B1	1460.24
1767	27393	Cc1ncc(c(c1)S)c1nsnc1	B2-B11-B13-B1	1471.78
1768	27397	Cc1ncc(cc1S)c1nsnc1	B2-B11-B13-B1	1488.69
1769	27434	N1CNC(NC1)SCc1ccccc1	B2-B9-B1-B5	1297.67
1770	27444	OSc1ccc(s1)c1ccccn1	B2-B3-B7-B11	1444.53
1771	27470	OSc1csc(c1)c1cccnc1	B2-B3-B7-B11	1453.96
1772	27479	OSc1ncccc1c1cccs1	B2-B3-B11-B7	1434.85
1773	27505	Oc1ccc(c(c1)c1cscn1)S	B3-B5-B2-B14	1467.66
1774	27562	Oc1cccc(n1)Sc1cccs1	B2-B11-B3-B7	1416.63
1775	27591	Oc1ccncc1Sc1ccsc1	B2-B11-B3-B7	1438.81
1776	27601	Oc1cnc(c(c1)c1cscc1)S	B2-B11-B3-B7	1466.84
1777	27623	Oc1csc(c1)Sc1cccnc1	B2-B7-B3-B11	1424.43
1778	27630	Oc1csc(c1)c1ncccc1S	B3-B7-B11-B2	1461.82
1779	27678	Oc1scc(c1)c1ccncc1S	B3-B7-B11-B2	1459.33
1780	27723	SCC1NCNC(N1)c1ccccc1	B1-B9-B2-B5	1301.42
1781	27740	SCc1cccnc1c1nncs1	B1-B11-B8-B2	1455.43
1782	27747	SCc1cnc(cn1)c1cscn1	B1-B12-B2-B14	1473.2
1783	27766	SCc1nccnc1c1ncsc1	B1-B12-B2-B14	1465.38
1784	27774	SCc1scnc1c1nccnc1	B1-B14-B2-B12	1462.29
1785	27789	SN1CNCNC1c1ccc(cc1)C	B2-B9-B5-B1	1293.74
1786	27815	SOc1ccncc1c1ccsc1	B2-B3-B11-B7	1445.78
1787	27835	SOc1ncccc1c1cscc1	B2-B3-B11-B7	1444.02
1788	27879	SSc1occ(c1)c1ccncc1	B2-B15-B2-B11	1441.55
1789	27890	Sc1cc(S)nc(c1)c1ccoc1	B2-B11-B15-B2	1456.18
1790	27897	Sc1cc(sc1O)c1ccccn1	B2-B7-B3-B11	1467.38
1791	27899	Sc1cc(sc1O)c1ccncc1	B2-B7-B3-B11	1479.84
1792	27918	Sc1ccc(c(n1)c1nncs1)C	B2-B11-B8-B1	1445.12
1793	27922	Sc1ccc(cc1)N1CNCNC1C	B2-B5-B9-B1	1300.56
1794	27925	Sc1ccc(cc1)Oc1scnc1	B3-B5-B2-B14	1415.42
1795	27958	Sc1ccc(nc1)Cc1nncs1	B1-B8-B11-B2	1424.02
1796	27960	Sc1ccc(nc1)Oc1cccs1	B2-B11-B3-B7	1413.13
1797	28002	Sc1cccc(c1)Oc1cncs1	B3-B5-B2-B14	1417.18
1798	28037	Sc1ccccc1c1ncsc1O	B3-B14-B5-B2	1448.64
1799	28038	Sc1ccccc1c1scnc1O	B3-B14-B5-B2	1453.14
1800	28047	Sc1cccnc1c1cocc1S	B2-B11-B15-B2	1446.7
1801	28049	Sc1cccnc1c1nsnc1C	B2-B11-B13-B1	1448.87
1802	28054	Sc1ccnc(c1)Oc1cccs1	B2-B11-B3-B7	1413.96
1803	28065	Sc1ccnc(c1)c1nsnc1C	B2-B11-B13-B1	1450.74
1804	28070	Sc1ccnc(c1C)c1nncs1	B2-B11-B8-B1	1458.88
1805	28071	Sc1ccnc(c1C)c1nsnc1	B2-B11-B13-B1	1479.34
1806	28072	Sc1ccnc(c1O)c1cccs1	B2-B11-B3-B7	1471.15
1807	28081	Sc1ccnc(c1c1nsnc1)C	B2-B11-B13-B1	1462.29
1808	28123	Sc1cnc(cc1S)c1ccco1	B2-B11-B15-B2	1469.7
1809	28125	Sc1cnc(cn1)Cc1cncs1	B1-B12-B2-B14	1437.05
1810	28127	Sc1cnc(cn1)Cc1nccs1	B1-B12-B2-B14	1433.39
1811	28131	Sc1cnc(cn1)c1ncsc1C	B2-B12-B14-B1	1441.81
1812	28144	Sc1cncc(c1)c1ccc(o1)S	B2-B15-B11-B2	1458.32
1813	28154	Sc1cncc(c1)c1scc(c1)O	B3-B7-B11-B2	1475.46
1814	28157	Sc1cncc(c1C)c1nsnc1	B2-B11-B13-B1	1486.31
1815	28176	Sc1cnccc1Sc1ccco1	B2-B11-B15-B2	1422.59
1816	28184	Sc1cnccc1c1sccc1O	B3-B7-B11-B2	1460.46
1817	28189	Sc1coc(c1)c1cccnc1S	B2-B15-B11-B2	1453.33
1818	28194	Sc1coc(c1S)c1cccnc1	B2-B15-B2-B11	1448.88
1819	28210	Sc1csc(c1O)c1ccncc1	B2-B7-B3-B11	1473.31
1820	28230	Sc1ncc(c(c1)O)c1cscc1	B2-B11-B3-B7	1465.06
1821	28236	Sc1ncc(c(c1)c1cocc1)S	B2-B11-B15-B2	1468.28
1822	28256	Sc1nccc(c1)Sc1ccco1	B2-B11-B15-B2	1413.04
1823	28265	Sc1nccc(c1)c1nsnc1C	B2-B11-B13-B1	1460.82
1824	28291	Sc1nccnc1Cc1ncsc1	B1-B12-B2-B14	1446.32
1825	28292	Sc1nccnc1c1ncsc1C	B2-B12-B14-B1	1438.37
1826	28294	Sc1ncsc1Cc1cnccn1	B2-B14-B1-B12	1449.05
1827	28297	Sc1nnc(s1)Cc1cccnc1	B2-B8-B1-B11	1414.74
1828	28305	Sc1nsnc1Cc1ccncc1	B2-B13-B1-B11	1459.44
1829	28316	Sc1occ(c1)c1cccnc1S	B2-B11-B15-B2	1466.14
1830	28319	Sc1occ(c1)c1cncc(c1)S	B2-B11-B15-B2	1460.11
1831	28326	Sc1occ(c1c1ccccn1)S	B2-B15-B2-B11	1448.66
1832	28331	Sc1occc1Sc1ccncc1	B2-B15-B2-B11	1417.55
1833	28336	Sc1sc(c(n1)c1cnccn1)C	B2-B14-B1-B12	1439.84
1834	28339	Sc1scc(c1)Oc1ccncc1	B2-B7-B3-B11	1418.13
1835	28354	Sc1scc(n1)c1nccnc1C	B2-B14-B12-B1	1447.12
1836	28370	c1ccc(cn1)SCc1nncs1	B1-B8-B2-B11	1413.97
1837	28382	c1ccc(nc1)SOc1cccs1	B2-B3-B11-B7	1375.09
1838	28396	n1ccc(cc1)SCc1nncs1	B1-B8-B2-B11	1415.47
1839	28401	n1ccc(cc1)SSc1cocc1	B2-B15-B2-B11	1394.5
1840	28407	C1NCN(CN1)SCc1ccccn1	B2-B9-B1-B11	1316.81
1841	28425	CC1(S)NCNCN1c1cccnc1	B2-B9-B1-B11	1356.72
1842	28450	CC1NCN(CN1)c1ccnc(c1)S	B2-B11-B9-B1	1363.76
1843	28458	CC1NCNC(N1)(S)c1cccnc1	B2-B9-B1-B11	1364.43
1844	28465	CC1NCNC(N1)c1cccc(n1)S	B2-B11-B9-B1	1348.57
1845	28466	CC1NCNC(N1)c1cccnc1S	B2-B11-B9-B1	1354.66
1846	28480	CC1NCNCN1c1ccc(nc1)S	B2-B11-B9-B1	1356.47
1847	28502	CN1CNC(NC1)(S)c1ccccn1	B2-B9-B1-B11	1355.47
1848	28536	CN1CNCN(C1c1ccccn1)S	B2-B9-B1-B11	1341.65
1849	28537	CN1CNCN(C1c1cccnc1)S	B2-B9-B1-B11	1347.64
1850	28539	CN1CNCNC1(S)c1ccccn1	B2-B9-B1-B11	1368.16
1851	28548	CN1CNCNC1c1cccnc1S	B2-B11-B9-B1	1384.39
1852	28577	CSc1ccc(cn1)N1CNCNC1	B2-B11-B9-B1	1351.9
1853	28604	Cc1c(S)ccnc1C1NCNCN1	B2-B11-B9-B1	1383.66
1854	28622	Cc1ccc(cn1)C1(S)NCNCN1	B2-B9-B11-B1	1356.83
1855	28650	Cc1ccnc(c1C1NCNCN1)S	B2-B11-B9-B1	1370.45
1856	28652	Cc1ccncc1SC1NCNCN1	B2-B11-B9-B1	1353.13
1857	28680	Cc1nc(S)cc(c1)N1CNCNC1	B2-B11-B9-B1	1364.68
1858	28701	Cc1nsnc1Sc1cnccn1	B2-B13-B1-B12	1496.03
1859	28705	N1CNC(NC1)SCc1ccccn1	B2-B9-B1-B11	1341.11
1860	28707	N1CNC(NC1)SCc1ccncc1	B2-B9-B1-B11	1350.63
1861	28715	OSc1ccc(nc1)c1cncs1	B2-B3-B11-B14	1507.04
1862	28723	OSc1cccc(n1)c1nccs1	B2-B3-B11-B14	1497.93
1863	28748	OSc1cnccc1c1scnc1	B2-B3-B11-B14	1514.16
1864	28764	OSc1nccnc1c1cscc1	B2-B3-B12-B7	1501.32
1865	28796	Oc1ccc(c(c1)c1nsnc1)S	B3-B5-B2-B13	1549.82
1866	28812	Oc1ccc(cn1)Sc1cscn1	B2-B11-B3-B14	1497.99
1867	28834	Oc1ccc(s1)Sc1cnccn1	B2-B7-B3-B12	1486
1868	28849	Oc1cccc(c1)c1nsnc1S	B2-B13-B5-B3	1545.61
1869	28851	Oc1cccc(c1S)c1nsnc1	B3-B5-B2-B13	1565.31
1870	28872	Oc1ccccc1c1nsnc1S	B2-B13-B5-B3	1532.74
1871	28890	Oc1ccnc(c1c1cncs1)S	B2-B11-B3-B14	1528.88
1872	28892	Oc1ccnc(c1c1ncsc1)S	B2-B11-B3-B14	1531.69
1873	28926	Oc1cnc(s1)c1cnccc1S	B2-B11-B14-B3	1536.05
1874	28928	Oc1cncc(c1)Sc1cncs1	B2-B11-B3-B14	1490.65
1875	28961	Oc1csc(c1)c1cncc(n1)S	B2-B12-B7-B3	1537.23
1876	28962	Oc1csc(c1)c1nccnc1S	B2-B12-B7-B3	1542.13
1877	28974	Oc1nc(S)cc(c1)c1nccs1	B2-B11-B3-B14	1547.3
1878	28983	Oc1ncc(c(c1)S)c1cncs1	B2-B11-B3-B14	1540.15
1879	28993	Oc1ncc(nc1S)c1cscc1	B3-B12-B2-B7	1534.1
1880	29001	Oc1nccc(c1)Sc1cncs1	B2-B11-B3-B14	1495.42
1881	29012	Oc1ncccc1Sc1cncs1	B2-B11-B3-B14	1492.93
1882	29037	Oc1scc(c1)c1nccnc1S	B2-B12-B7-B3	1535.55
1883	29060	SC1(CCCC1)Sc1ccccc1	B2-B10-B2-B5	1200.41
1884	29074	SC1CCC(C1)(S)c1ccccc1	B2-B10-B2-B5	1241.89
1885	29088	SC1NCN(C(N1)C)c1ccncc1	B2-B9-B1-B11	1352.31
1886	29091	SC1NCN(C(N1)c1ccncc1)C	B2-B9-B1-B11	1368.08
1887	29116	SC1NCNC(N1)c1ccnc(c1)C	B2-B9-B11-B1	1355.78
1888	29126	SC1NCNCN1c1ccc(nc1)C	B2-B9-B11-B1	1356.91
1889	29128	SC1NCNCN1c1cccnc1C	B2-B9-B11-B1	1358.4
1890	29140	SCC1NCNC(N1)c1cccnc1	B1-B9-B2-B11	1361.45
1891	29169	SCc1cncc(c1)N1CNCNC1	B9-B11-B1-B2	1384.89
1892	29176	SCc1ncccc1C1NCNCN1	B9-B11-B1-B2	1396.82
1893	29177	SCc1ncccc1N1CNCNC1	B9-B11-B1-B2	1372.74
1894	29217	SN1CNCN(C1)c1cccnc1C	B2-B9-B11-B1	1338.6
1895	29231	SN1CNCNC1Cc1ccncc1	B2-B9-B1-B11	1350.19
1896	29234	SN1CNCNC1c1cccc(n1)C	B2-B9-B11-B1	1339.51
1897	29240	SN1CNCNC1c1nccc(c1)C	B2-B9-B11-B1	1347.79
1898	29264	SOc1ccncc1c1cncs1	B2-B3-B11-B14	1519.97
1899	29268	SOc1cnc(cn1)c1cccs1	B3-B12-B2-B7	1506.42
1900	29307	SOc1scnc1c1ccccn1	B2-B3-B14-B11	1499.59
1901	29316	SSc1ccccc1C1CCCC1	B2-B5-B10-B2	1208.55
1902	29317	SSc1ccoc1c1cnccn1	B2-B15-B2-B12	1502.23
1903	29320	SSc1cncc(n1)c1ccco1	B2-B12-B2-B15	1481.37
1904	29329	Sc1c(C)ccnc1N1CNCNC1	B2-B11-B9-B1	1365.51
1905	29334	Sc1c(cncc1C)C1NCNCN1	B2-B11-B9-B1	1368.61
1906	29338	Sc1cc(O)nc(c1)c1cncs1	B2-B11-B3-B14	1541.37
1907	29345	Sc1cc(ncc1C)C1NCNCN1	B2-B11-B9-B1	1371.64
1908	29346	Sc1cc(ncc1C)N1CNCNC1	B2-B11-B9-B1	1371
1909	29358	Sc1ccc(c(n1)c1nccs1)O	B2-B11-B3-B14	1531.36
1910	29363	Sc1ccc(cc1)c1nsnc1O	B2-B5-B13-B3	1551.2
1911	29366	Sc1ccc(cc1O)c1nsnc1	B3-B5-B2-B13	1571.21
1912	29373	Sc1ccc(cn1)Oc1nccs1	B2-B11-B3-B14	1485.44
1913	29384	Sc1ccc(nc1)Oc1cncs1	B2-B11-B3-B14	1484.89
1914	29403	Sc1cccc(c1)Oc1nncs1	B3-B5-B2-B8	1474.2
1915	29434	Sc1ccnc(c1)CC1NCNCN1	B1-B9-B11-B2	1367.09
1916	29450	Sc1ccnc(c1O)c1nccs1	B2-B11-B3-B14	1540.4
1917	29458	Sc1ccncc1Oc1nccs1	B2-B11-B3-B14	1486.62
1918	29468	Sc1cnc(c(c1)c1cncs1)O	B2-B11-B3-B14	1541.51
1919	29479	Sc1cnc(c(n1)c1cocc1)S	B2-B12-B2-B15	1525.77
1920	29495	Sc1cnc(cn1)c1ccsc1O	B2-B12-B7-B3	1537.68
1921	29523	Sc1cncc(c1O)c1nccs1	B2-B11-B3-B14	1546.44
1922	29549	Sc1coc(c1)Sc1cnccn1	B2-B15-B2-B12	1476.49
1923	29556	Sc1csc(c1)c1cncc(n1)O	B2-B7-B12-B3	1529.54
1924	29559	Sc1csc(c1c1cnccn1)O	B2-B7-B3-B12	1530.27
1925	29562	Sc1csc(n1)Oc1ccncc1	B2-B14-B3-B11	1484.51
1926	29564	Sc1csc(n1)c1ccnc(c1)O	B2-B14-B11-B3	1534.67
1927	29592	Sc1ncc(nc1)c1ccc(o1)S	B2-B15-B12-B2	1517.84
1928	29607	Sc1ncc(s1)c1cccnc1O	B2-B14-B11-B3	1535.03
1929	29608	Sc1ncc(s1)c1ccncc1O	B2-B14-B11-B3	1534.56
1930	29622	Sc1nccc(c1O)c1cncs1	B2-B11-B3-B14	1548.03
1931	29633	Sc1nccnc1Cc1nsnc1	B1-B12-B2-B13	1530.82
1932	29636	Sc1nccnc1Sc1ccco1	B2-B12-B2-B15	1488.49
1933	29661	Sc1occc1Sc1cnccn1	B2-B15-B2-B12	1480.66
1934	29678	Sc1scnc1Oc1ccccn1	B2-B14-B3-B11	1486.96
1935	29694	c1ccc(cc1)c1coc(c1)c1ccco1	B15-B15-B5	1282
1936	29726	c1coc(c1)c1ccc(cc1)c1ccco1	B5-B15-B15	1293.56
1937	29748	CC1(CSCCS1)c1cccnc1	B1-B6-B11	1297.56
1938	29798	CN1CNCN(C1)Sc1cnccn1	B2-B9-B1-B12	1378.11
1939	29811	CSC1NCNC(N1)c1cnccn1	B2-B9-B1-B12	1404.51
1940	29830	Cc1cncc(n1)SN1CNCNC1	B1-B12-B2-B9	1374.66
1941	29842	Cc1nccnc1SC1NCNCN1	B1-B12-B2-B9	1405.75
1942	29850	N1CNCN(C1)SCc1nccnc1	B2-B9-B1-B12	1381.18
1943	29921	OSc1cnc(cn1)c1nccs1	B2-B3-B12-B14	1568.5
1944	29946	OSc1nsnc1c1ccncc1	B2-B3-B13-B11	1590.87
1945	29955	Oc1ccc(c(c1)S)N1CNCNC1	B3-B5-B2-B9	1429.26
1946	29967	Oc1ccc(cn1)Sc1nncs1	B2-B11-B3-B8	1545.64
1947	29968	Oc1ccc(cn1)Sc1nsnc1	B2-B11-B3-B13	1578.41
1948	29982	Oc1cccc(c1N1CNCNC1)S	B3-B5-B2-B9	1422.94
1949	29986	Oc1cccc(n1)c1nsnc1S	B2-B13-B11-B3	1608.38
1950	29988	Oc1ccccc1SC1NCNCN1	B3-B5-B2-B9	1416.05
1951	30012	Oc1cnc(c(n1)c1nccs1)S	B3-B12-B2-B14	1606.91
1952	30024	Oc1cnc(cn1)c1scnc1S	B2-B14-B12-B3	1602.5
1953	30051	Oc1nc(sc1S)c1cnccn1	B2-B14-B3-B12	1603.85
1954	30054	Oc1ncc(c(c1)c1cnsn1)S	B2-B11-B3-B13	1627.87
1955	30056	Oc1ncc(cc1S)c1nncs1	B2-B11-B3-B8	1604.53
1956	30087	Oc1nsnc1Sc1ccncc1	B2-B13-B3-B11	1575.77
1957	30107	SC1(S)CCC(C1)c1ccccn1	B2-B10-B2-B11	1275.77
1958	30109	SC1(S)CCC(C1)c1ccncc1	B2-B10-B2-B11	1285.55
1959	30120	SC1CCC(C1)(S)c1ccccn1	B2-B10-B2-B11	1285.09
1960	30140	SC1CCC(C1c1ccncc1)S	B2-B10-B2-B11	1285.71
1961	30173	SC1NCNC(N1)Oc1ccccc1	B2-B9-B3-B5	1394.46
1962	30212	SN1CNC(NC1)c1ncc(nc1)C	B2-B9-B12-B1	1400.74
1963	30219	SN1CNCN(C1)c1cccc(c1)O	B2-B9-B5-B3	1418.25
1964	30225	SN1CNCNC1(O)c1ccccc1	B2-B9-B3-B5	1413.95
1965	30228	SN1CNCNC1c1ccc(cc1)O	B2-B9-B5-B3	1419.15
1966	30245	SOc1ccc(nc1)c1nncs1	B2-B3-B11-B8	1571.54
1967	30270	SOc1csc(n1)c1cnccn1	B2-B3-B14-B12	1580.86
1968	30272	SOc1ncc(s1)c1cnccn1	B2-B3-B14-B12	1580.14
1969	30287	SOc1scnc1c1nccnc1	B2-B3-B14-B12	1582.05
1970	30299	SSc1cccc(n1)C1CCCC1	B2-B11-B2-B10	1242.75
1971	30307	Sc1c(O)cccc1N1CNCNC1	B3-B5-B2-B9	1436.85
1972	30316	Sc1cc(ncc1S)C1CCCC1	B2-B11-B2-B10	1277.11
1973	30322	Sc1ccc(c(n1)c1nncs1)O	B2-B11-B3-B8	1593.02
1974	30335	Sc1ccc(cn1)c1nnc(s1)O	B2-B11-B8-B3	1589.44
1975	30336	Sc1ccc(cn1)c1nsnc1O	B2-B11-B13-B3	1620.35
1976	30346	Sc1cccc(c1)C1(O)NCNCN1	B2-B5-B9-B3	1427.98
1977	30379	Sc1cnc(c(c1)O)c1nsnc1	B2-B11-B3-B13	1623.1
1978	30409	Sc1cncc(c1C1CCCC1)S	B2-B11-B2-B10	1306.07
1979	30467	Sc1nccnc1CC1NCNCN1	B1-B12-B2-B9	1431.76
1980	30468	Sc1nccnc1CN1CNCNC1	B1-B12-B2-B9	1422.03
1981	30477	Sc1nnc(s1)Oc1ccncc1	B2-B8-B3-B11	1533.91
1982	30507	c1ccc(cn1)c1occc1c1ccco1	B15-B15-B11	1317.82
1983	30533	c1coc(c1)c1cnccc1c1ccco1	B11-B15-B15	1314.64
1984	30538	c1ncc(s1)c1cccc2c1cccc2	B16-B14	1327.49
1985	30539	c1occ(c1)c1cnccc1c1cocc1	B11-B15-B15	1333.14
1986	30547	n1ccc(cc1)SOc1nncs1	B2-B3-B11-B8	1510.08
1987	30554	n1ccc(cc1)c1coc(c1)c1cocc1	B15-B15-B11	1344.47
1988	30556	n1ccc(cc1)c1cocc1c1cocc1	B15-B15-B11	1328.73
1989	30565	o1ccc(c1)c1ccnc(c1)c1ccco1	B11-B15-B15	1330.24
1990	30579	C1CCC(C1)c1ccc(cc1)c1ccoc1	B5-B15-B10	1138.27
1991	30585	C1CCC(C1)c1ccoc1c1ccccc1	B10-B15-B5	1123.18
1992	30594	CC1(CSCCS1)c1cnccn1	B1-B6-B12	1344.1
1993	30609	CSc1sccc1c1cscc1	B2-B7-B1-B7	1432.72
1994	30618	Cc1ccc(s1)c1csc(c1)S	B7-B7-B2-B1	1402.32
1995	30621	Cc1ccsc1Sc1cccs1	B2-B7-B1-B7	1357.9
1996	30642	Cc1cscc1c1sccc1S	B7-B7-B2-B1	1452.43
1997	30649	Cc1scc(c1)c1csc(c1)S	B7-B7-B2-B1	1403.48
1998	30652	Cc1scc(c1)c1sccc1S	B7-B7-B2-B1	1427.39
1999	30660	N1CNC(NC1)OSc1cccnc1	B2-B3-B11-B9	1436.55
[truncated: 98,001 more rows]

## Sheet: Descriptors
Descriptor name
MW
AMW
Sv
Se
Sp
Si
Mv
Me
Mp
Mi
nAT
nSK
nBT
nBO
nBM
SCBO
RBN
RBF
nDB
nTB
nAB
nH
nC
nN
nO
nP
nS
nF
nCL
nBR
nI
nB
nHM
nHet
nX
H%
C%
N%
O%
X%
nCsp3
nCsp2
nCsp
nCp
nCs
nCt
nCq
nCrs
nCrt
nCrq
nCar
nCbH
nCb-
nCconj
nR=Cp
nR=Cs
nR=Ct
n=C=
nR#CH/X
nR#C-
nROCN
nArOCN
nRNCO
nArNCO
nRSCN
nArSCN
nRNCS
nArNCS
nRCOOH
nArCOOH
nRCOOR
nArCOOR
nRCONH2
nArCONH2
nRCONHR
nArCONHR
nRCONR2
nArCONR2
nROCON
nArOCON
nRCOX
nArCOX
nRCSOH
nArCSOH
nRCSSH
nArCSSH
nRCOSR
nArCOSR
nRCSSR
nArCSSR
nRCHO
nArCHO
nRCO
nArCO
nCONN
nC=O(O)2
nN=C-N<
nC(=N)N2
nRC=N
nArC=N
nRCNO
nArCNO
nRNH2
nArNH2
nRNHR
nArNHR
nRNR2
nArNR2
nN-N
nN=N
nRCN
nArCN
nN+
nNq
nRNHO
nArNHO
nRNNOx
nArNNOx
nRNO
nArNO
nRNO2
nArNO2
nN(CO)2
nC=N-N<
nROH
nArOH
nOHp
nOHs
nOHt
nROR
nArOR
nROX
nArOX
nO(C=O)2
nH2O
nSH
nC=S
nRSR
nRSSR
nSO
nS(=O)2
nSOH
nSOOH
nSO2OH
nSO3OH
nSO2
nSO3
nSO4
nSO2N
nPO3
nPO4
nPR3
nP(=O)O2R
nP(=O)R3/nPR5
nCH2RX
nCHR2X
nCR3X
nR=CHX
nR=CRX
nR#CX
nCHRX2
nCR2X2
nR=CX2
nCRX3
nArX
nCXr
nCXr=
nCconjX
nAziridines
nOxiranes
nThiranes
nAzetidines
nOxetanes
nThioethanes
nBeta-Lactams
nPyrrolidines
nOxolanes
ntH-Thiophenes
nPyrroles
nPyrazoles
nImidazoles
nFuranes
nThiophenes
nOxazoles
nIsoxazoles
nThiazoles
nIsothiazoles
nTriazoles
nPyridines
nPyridazines
nPyrimidines
nPyrazines
n135-Triazines
n124-Triazines
nHDon
nHAcc
nHBonds

## Sheet: Experimental_data
SMILES	Experimental_density (kg/m3)	Density_Molar (kg/m3)	Density_Molar (calibrated) (kg/m3)	Error (kg/m3)
CCC(C)C	620	615.324	599.785	20.2147
CCCC(C)C	653	646.597	637.781	15.2193
CC(C)CC(C)(C)C	688	709.918	714.713	26.7131
CC(C)N	689	658.715	652.504	36.4964
CCCCCCCC	703	684.549	683.891	19.1092
CCC#CC	712	723.23	730.887	18.8867
CC(C)(C)CC#C	714	756.993	771.907	57.9073
CCCCC#C	715	732.388	742.013	27.0133
CCCCCCCCC	717	704.841	708.545	8.45522
CC(C)CCCCC(C)C	725	724.289	732.173	7.1733
CC(C)OC(C)C	726	731.705	741.183	15.1834
CCCCCCCCCC	730	719.122	725.896	4.10439
CCCC#CC	731	734.073	744.06	13.0605
CCCCCC#C	734	750.873	764.472	30.4718
CCCCCCCCCCC	740	732.017	741.563	1.56251
C1CCCC1	745	717.977	724.504	20.4955
CCCCCCC#C	746	758.971	774.311	28.3105
CCCCC#CC	748	747.094	759.88	11.8804
CCCOCCC	749	738.929	749.96	0.960303
CCCCCCCCCCCC	749	743.941	756.05	7.04968
CCCCCCCCCCCCC	756	749.485	762.785	6.78541
CCCCCCCC#C	758	771.691	789.765	31.7648
CCCCCCCCCCC=C	760	749.738	763.093	3.09279
CCCCCOC	761	752.547	766.506	5.50561
CCCCCOCC	762	756.829	771.708	9.70807
CCCCCCCCCCCCCC	762	767.219	784.331	22.3315
CC1CCCCC1	769	772.32	790.529	21.529
CCCCCCCCCCCCCC=C	769	769.661	787.298	18.2984
CCCCOCCCC	770	762.149	778.172	8.17165
C1CC=CC1	772	735.013	745.203	26.7975
CCCCOC	774	730.969	740.289	33.7108
CCCCCCCCCCCCCCC=C	774	777.125	796.367	22.3669
CC#N	777	679.873	678.21	98.7903
CCCCF	779	691.244	692.025	86.975
CCC1CCCCC1	784	783.465	804.07	20.0697
CC(C)O	785	689.926	690.424	94.5763
CC(C)(C)O	788	721.168	728.381	59.6186
CCCCCCCCCCCCCCCCC=C	789	776.92	796.118	7.11781
CCCC1CCCCC1	790	786.635	807.921	17.9211
CCCCC1CCCCC1	800	796.789	820.258	20.2578
CC(C)C1CCCCC1	802	797.203	820.761	18.7608
CC(C)CCC1CCCCC1	802	804.379	829.479	27.4794
CCCO	803	698.226	700.508	102.492
CCCCCC1CCCCC1	804	803.202	828.049	24.0494
CCC(C)=O	805	727.627	736.229	68.7712
CCC(C)O	807	726.668	735.064	71.9363
CCCC(C)=O	809	745.784	758.289	50.7112
CCCCC=O	809	754.839	769.29	39.7097
CCCCO	810	735.051	745.249	64.7513
C1CCC=CC1	810	775.301	794.151	15.8492
C1CCCCCC1	811	790.162	812.206	1.2063
CCCCC(C)=O	811	767.717	784.937	26.0635
CCCC(=O)CC	812	760.593	776.281	35.7188
CCC(=O)CC	814	741.018	752.498	61.5016
CCCCCC=O	814	768.988	786.481	27.5192
CCCC=O	817	735.179	745.404	71.5958
CCCC(C)C(C)=O	828	775.281	794.126	33.8735
CCCCCCCCCCCCCC(O)=O	844	877.33	918.112	74.1118
C1CNC1	847	742.11	753.825	93.1749
COC(C)OC	850	846.032	880.086	30.0861
CC(C)C1=CC=C(C)C=C1	857	843.906	877.503	20.5031
CC1(CCCC1)OC1(C)CCCC1	862	911.221	959.288	97.288
CC(C)C1=CC=CC=C1	862	841.777	874.916	12.9164
CCC1=CC(CC)=CC(CC)=C1	863	835.189	866.912	3.91226
CC1=CC(C)=CC(C)=C1	865	846.909	881.152	16.1516
CCC1=CC=CC=C1	868	832.549	863.705	4.29524
CCCCOC(=O)CC	875	853.278	888.89	13.8896
COC1CCCCC1	875	867.107	905.691	30.6913
CCCCCCCl	878	846.05	880.108	2.10793
CCCCCl	886	834.452	866.017	19.9832
Cc1cc(c(c(c1)C(C)(C)C)O)C(C)(C)C	894	914.033	962.704	68.7045
CCN1CN(CC)CN(CC)C1	894	934.909	988.068	94.068
C(CN)N	898	831.624	862.581	35.4191
CN1CN(C)CN(C)C1	919	1004.55	1072.68	153.679
CC(C)CC(O)=O	933	893.794	938.115	5.11493
COC(C)=O	939	887.026	929.892	9.10791
CCCCC(=O)O	939	894	938.365	0.63479
CCOCC1=CC=CC=C1	949	921.131	971.328	22.3283
C1CCC(CC1)C1=CC=CC=C1	950	935.737	989.074	39.074
CCC[N+]([O-])=O	953	974.789	1036.52	83.5205
COCC1=CC=CC=C1	963	930.808	983.085	20.0854
CCCC(=O)OC(=O)CCC	968	938.534	992.472	24.4722
CC(=O)OC1CCCCC1	970	947.921	1003.88	33.877
CCCC[N+]([O-])=O	971	947.938	1003.9	32.8977
CC1=CC=C(N)C=C1	973	932.206	984.784	11.7839
CC(=O)C(=O)C	981	892.814	936.924	44.0757
CC(C)[N+]([O-])=O	988	963.813	1023.19	35.1851
CCC(O)=O	993	899.215	944.701	48.2988
CCC(c1ccccc1)O	994	930.86	983.149	10.8514
COC1=CC=CC=C1	996	941.349	995.892	0.107696
CCC[N+]([O-])=O	1001	972.309	1033.51	32.5074
CCC(=O)c1ccccc1	1009	957.457	1015.46	6.46286
CNC=O	1010	895.043	939.632	70.3676
CC(=O)N1CCCCC1	1011	959.429	1017.86	6.85876
CC(O)C1=CC=CC=C1	1015	953.036	1010.09	4.90847
Cc1cccc2c1cccc2	1019	1000.45	1067.7	48.6976
NC1=CC=CC=C1	1021	944.403	999.603	21.3972
OCCC1=CC=CC=C1	1023	947.101	1002.88	20.1193
C1CC2=C3C1=CC=CC3=CC=C2	1024	1063.96	1144.86	120.86
CCCC(Cl)=O	1028	977.751	1040.12	12.1192
CC(C)O[N+]([O-])=O	1036	1060.19	1140.28	104.279
OCC1=CC=CC=C1	1042	969.081	1029.59	12.4145
CC1=CC=C(N)C=C1	1046	934.565	987.65	58.35
Cc1cc(c(c(c1)C(C)(C)C)O)C(C)(C)C	1048	915.96	965.046	82.9543
CC[N+](=O)[O-]	1050	1007.25	1075.96	25.9593
CCC(Cl)=O	1056	997.081	1063.6	7.6044
OC1=CC=CC=C1	1057	968.424	1028.79	28.2127
C=CCOC(=O)c1ccccc1	1058	1023.03	1095.13	37.1314
CCCO[N+]([O-])=O	1058	1068.3	1150.13	92.1326
C(CCCl)CF	1063	963.292	1022.55	40.4479
CC1=CC=C(Cl)C=C1	1070	1029.74	1103.28	33.2837
O(C1=CC=CC=C1)C1=CC=CC=C1	1075	1050.56	1128.58	53.5792
CCOC(=O)N(C)c1ccccc1	1090	1045.55	1122.49	32.4922
CCO[N+]([O-])=O	1100	1119.56	1212.41	112.411
OCCF	1104	845.117	878.974	225.026
COc1ccc(cc1)CO	1109	1045.77	1122.76	13.7595
CC(=O)OCCO	1109	1018.32	1089.41	19.5911
CC1=CC=C(C=C1)[N+]([O-])=O	1123	1123.52	1217.22	94.2226
O=CC=O	1140	925.824	977.03	162.97
C1=CC2=CC=CC=C2C=C1	1145	991.299	1056.58	88.4205
O=C(C1=CC=CC=C1)C1=CC=CC=C1	1146	1071.26	1153.73	7.72884
CCC(=O)C1=CC=CC=C1	1157	959.274	1017.67	139.33
CC1=C(N)C=CC(=C1)[N+]([O-])=O	1159	1210.67	1323.11	164.106
[O-][N+](=O)CC1=CC=CC=C1	1160	1131.83	1227.32	67.3189
CC(=O)C(O)=O	1227	1097.5	1185.61	41.3906
C(CCl)Cl	1235	1088.05	1174.13	60.872
CC(C)(O)CC1=CC=C(Cl)C=C1	1240	1062.1	1142.6	97.4002
Cc1c(cccc1Cl)Cl	1269	1226.06	1341.8	72.8045
CC1=CC=C(C=C1)[N+]([O-])=O	1287	1119.9	1212.82	74.1756
CC/N=c\1/[nH]/c(=N\CC)/nc([nH]1)Cl	1302	1197.34	1306.91	4.91087
O=C1OC(=O)C=C1	1314	1275.7	1402.12	88.1151
Cc1ccc(cc1[N+](=O)[O-])[N+](=O)[O-]	1321	1332.03	1470.55	149.554
COS(=O)(=O)OC	1328	1356.97	1500.85	172.855
OC(=O)CCCCC(O)=O	1360	1112.75	1204.14	155.863
OC(=O)CCl	1370	1256.69	1379.02	9.01869
COC1=CC=C(C=C1)C(O)=O	1385	1165.95	1268.77	116.227
BrC1CCCC1	1387	1374.54	1522.2	135.202
CC1=CC=C(Br)C=C1	1410	1375.92	1523.88	113.878
NC1=CC=C(C=C1)[N+]([O-])=O	1422	1247.07	1367.33	54.6692
CC1=C(Br)C=CC=C1	1425	1390.04	1541.03	116.033
CCCBr	1435	1303.09	1435.39	0.392788
ClCC(Cl)Cl	1440	1339.25	1479.33	39.3257
O=N(=O)OCCON(=O)=O	1480	1476.84	1646.49	166.492
ClCCCCBr	1488	1424.41	1582.79	94.7916
OC(=O)C1=CC(Cl)=CC=C1	1496	1287.46	1416.4	79.597
CC1=C(C=C(C=C1)[N+]([O-])=O)[N+]([O-])=O	1521	1333.55	1472.4	48.5996
ClC1=CC=C(Cl)C=C1	1526	1220.84	1335.46	190.538
OC(=O)C1=C(Cl)C=CC=C1	1544	1288.45	1417.61	126.394
NC1=NC(N)=NC(N)=N1	1573	1397.19	1549.72	23.2796
[O-][N+](=O)C(=C1NCC2(CN1)CNC(NC2)=C([N+]([O-])=O)[N+]([O-])=O)[N+]([O-])=O	1587	1479.84	1650.14	63.1368
ClC(Cl)C(Cl)Cl	1595	1507.34	1683.55	88.5482
CCOC(=O)Nc1c(cc(cc1[N+](=O)[O-])[N+](=O)[O-])[N+](=O)[O-]	1600	1455.41	1620.46	20.4553
CC(C)CI	1602	1604.03	1801.02	199.023
CC1=C(C=C(C=C1[N+]([O-])=O)[N+]([O-])=O)[N+]([O-])=O	1654	1474.08	1643.14	10.8614
OCC1=CC(O)=CC=C1	1161	1081.98	1166.75	5.7532
CC(C)NC1=NC(NC(C)C)=NC(Cl)=N1	1162	1119.38	1212.19	50.1927
CC(=O)CC(=O)NCCO	1168	1070.52	1152.83	15.1702
CCNC1=NC(Cl)=NC(NC(C)C)=N1	1187	1164.57	1267.1	80.0967
COC(=O)C1=CC=CC=C1C(=O)OC	1191	1166.68	1269.66	78.6602
CC1COC(=O)O1	1204	1154.64	1255.03	51.0321
CC(=O)NC1=CC=C(C)C=C1	1212	1006.37	1074.89	137.11
OCCCl	1200	1031.58	1105.52	94.4807
OC1=CC2=CC=CC=C2C=C1	1217	1100.61	1189.39	27.6121
OC=O	1220	973.519	1034.98	185.022
OC1=CC=CC2=CC=CC=C12	1222.4	1105.47	1195.29	27.1074
CC(=O)OO	1226	1040.74	1116.65	109.352
[O-][N+](=O)C(=C1NCCN1)[N+]([O-])=O	1702	1514.26	1691.96	10.0443
[O-][N+](=O)C1=CC(=C(N=[N+]=[N-])C(=C1)[N+]([O-])=O)[N+]([O-])=O	1709	1578.78	1770.34	61.3448
c1(nc(nc(n1)O)O)O	1768	1489.79	1662.23	105.774
NNC1=C(C=C(C=C1[N+]([O-])=O)[N+]([O-])=O)[N+]([O-])=O	1775	1589.37	1783.21	8.21125
NC1=C(C(O)=C(C(O)=C1[N+]([O-])=O)[N+]([O-])=O)[N+]([O-])=O	1896	1654.96	1862.9	33.0996
[O-][N+](=O)C1=CC(=C(N(F)F)C(=C1)[N+]([O-])=O)[N+]([O-])=O	1910	1634.28	1837.78	72.2249
[O-][N+](=O)C1=NC(=NC(=N1)[N+]([O-])=O)[N+]([O-])=O	1915	1719.57	1941.4	26.3989
ClC1=C2C(=O)OC(=O)C2=C(Cl)C(Cl)=C1Cl	1920	1714.61	1935.37	15.3727
c1(c(c(c(c(c1[N+](=O)[O-])N)[N+](=O)[O-])N)[N+](=O)[O-])N	1930	1618.19	1818.23	111.774

## Sheet: SAscore
Building block number	SMILES	SAscore
1	C	2.57877
2	S	2.60065
3	O	2.57877
4	c1ccccc1	2.43211
5	S1CCSCC1	2.64915
6	s1cccc1	2.53256
7	s1cnnc1	2.58931
8	N1CNCNC1	2.61008
9	C1CCCC1	2.86594
10	n1ccccc1	2.44756
11	n1ccncc1	2.5913
12	n1ccns1	2.70916
13	n1ccsc1	2.62024
14	c1cocc1	2.47669
15	C1=CC=C2C=CC=CC2=C1	2.42917
